# Supplementary material
Source: PubMed Central journal article supplement (PMC8317135)
Supplement: NIHMS1711267-supplement-SI_file_001.pdf [file NIHMS1711267-supplement-SI_file_001.pdf]

## Supporting Information

### Structure Activity Relationship of Heterocyclic P2Y<sub>14</sub> Receptor Antagonists: Removal of the Zwitterionic Character with Piperidine Bioisosteres

Young-Hwan Jung,<sup>†^</sup> Veronica Salmaso,<sup>†^</sup> Zhiwei Wen,<sup>†</sup> John M. Bennett,<sup>†</sup> Ngan B. Phung,<sup>†</sup>  
David I. Lieberman,<sup>†</sup> Varun Gopinath,<sup>†</sup> John C. R. Randle,<sup>¶</sup> Zhoumou Chen,<sup>¥</sup> Daniela  
Salvemini,<sup>¥</sup> Tadeusz P. Karcz,<sup>+,\*</sup> Donald N. Cook,<sup>+</sup> and Kenneth A. Jacobson<sup>†\*</sup>

<sup>†</sup> Molecular Recognition Section, Laboratory of Bioorganic Chemistry, National Institute of Diabetes and Digestive and Kidney Diseases, National Institutes of Health, Bethesda, MD 20892 USA.

<sup>+</sup> Immunity, Inflammation and Disease Laboratory, National Institute of Environmental Health Sciences, National Institutes of Health, Research Triangle Park, NC 27709 USA.

<sup>¥</sup> Department of Pharmacology and Physiology and the Henry and Amelia Nasrallah Center for Neuroscience, Saint Louis University School of Medicine, 1402 South Grand Blvd., St. Louis, MO 63104, USA.

<sup>¶</sup> Random Walk Ventures, LLC, 108 Lincoln Street Unit 6B, Boston, MA 02111 USA.

<sup>\*</sup> Current address: Jagiellonian University, Kraków, 2175 31-007, Poland.

<sup>^</sup> equal contribution.

| Contents                                                        | Pages   |
|-----------------------------------------------------------------|---------|
| Synthetic Scheme S1 and S2                                      | S2      |
| Modeling of hP2Y <sub>14</sub> R (Tables S1, S2)                | S3-S4   |
| Chronic pain model: data (Table S3)                             | S5      |
| Modeling of hP2Y <sub>14</sub> R (Figures S1 – S5)              | S6-S10  |
| Off-target interactions (Figures S6)                            | S11-S12 |
| Esterase cleavage of prodrugs (Figures S7 – S9)                 | S13-S21 |
| NMR, MS and HPLC purity of final products                       | S22-S57 |
| ADMET properties of <b>32</b> (Figure S10)                      | S58-S60 |
| Patch clamp hERG assay of <b>1a</b> , <b>1b</b> , and <b>32</b> | S61     |

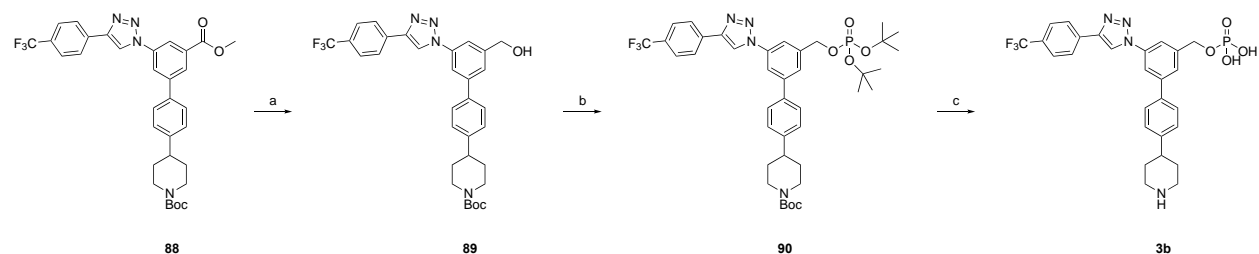

**Scheme S1.** Reagents and Conditions: (a) LAH, THF, 0 °C, 1 h, 45%; (b) di-*tert*-butyl *N,N*-diethylphosphoramidite, tetrazole, THF, rt, 1 h, then MCPBA, -78 °C, 84%; (c) TFA:THF = 2:1, rt, 2 h, 69%. See the main text for the procedures.

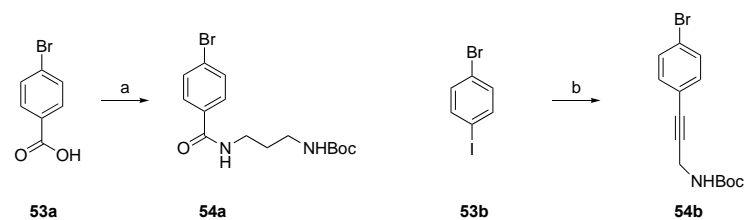

**Scheme S2.** Reagents and conditions: a) Boc-propylene-diamine, HATU, DIPEA, DMF, rt, 2 h, 31%; b) PdCl<sub>2</sub>(PPh<sub>3</sub>)<sub>2</sub>, copper iodide, THF, triethylamine, *N*-Boc-propargylamine, rt, 94%. See the main text for the procedures.

### Molecular modeling

**Table S1.** Inter-replicate average RMSD, Interaction Energy (as sum of electrostatic and van der Waals), Weighted Dynamic Scoring Function (wDSF), percentage of hydrogen bonds of Lys77<sup>2.60</sup>, Tyr102<sup>3.33</sup> and Lys277<sup>7.35</sup>. Compounds with wDSF/time lower than compound **3a** (reference) and IC<sub>50</sub> lower than 1  $\mu$ M are highlighted in green and considered true positives. False positives (wDSF lower than **3a**, but IC<sub>50</sub> higher than 1  $\mu$ M) are highlighted in red, false negatives (wDSF higher than **3a**, but IC<sub>50</sub> lower than 1  $\mu$ M) in orange, and not synthesized compounds in gray. See Figure S1 for structures.

| Compound                  | Average values among 3 replicates |                                     |               |                                     |                                      |                                      | IC <sub>50</sub><br>( $\mu$ M) |
|---------------------------|-----------------------------------|-------------------------------------|---------------|-------------------------------------|--------------------------------------|--------------------------------------|--------------------------------|
|                           | RMSD<br>(Å)                       | Interaction<br>Energy<br>(kcal/mol) | Slope<br>wDSF | Lys77 <sup>2.60</sup><br>(% hbonds) | Tyr102 <sup>3.33</sup><br>(% hbonds) | Lys277 <sup>7.35</sup><br>(% hbonds) |                                |
| <b>1a</b>                 | 1.90                              | -201.46                             | -99.63        | 63.89                               | 26.98                                | 83.20                                | 0.00796                        |
| <b>3a</b>                 | 3.01                              | -173.21                             | -70.55        | 91.24                               | 18.91                                | 75.69                                | 0.0317                         |
| <b>7</b>                  | 3.25                              | -171.93                             | -50.64        | 88.04                               | 74.31                                | 66.91                                | 1.48                           |
| <b>8</b>                  | 2.22                              | -177.83                             | -71.17        | 83.20                               | 48.07                                | 64.22                                | 0.811                          |
| <b>9</b>                  | 2.94                              | -179.27                             | -53.88        | 65.91                               | 31.47                                | 65.16                                | 1.86                           |
| <b>10</b>                 | 2.98                              | -176.40                             | -52.43        | 83.67                               | 7.02                                 | 81.89                                | 3.16                           |
| <b>11</b>                 | 2.00                              | -235.43                             | -120.39       | 92.96                               | 77.49                                | 73.24                                | 0.197                          |
| <b>13</b>                 | 4.30                              | -223.25                             | -37.41        | 1.62                                | 66.31                                | 48.44                                | 0.632                          |
| <b>14</b>                 | 2.37                              | -250.33                             | -107.21       | 82.93                               | 60.16                                | 77.18                                | 0.588                          |
| <b>15</b>                 | 3.05                              | -173.01                             | -53.41        | 86.53                               | 54.38                                | 74.64                                | >10                            |
| <b>16</b>                 | 7.05                              | -148.38                             | -20.43        | 0.00                                | 16.18                                | 36.64                                | 1.29                           |
| <b>17</b>                 | 3.66                              | -177.61                             | -48.05        | 84.71                               | 88.02                                | 82.80                                | 17.8                           |
| <b>18</b>                 | 1.94                              | -200.75                             | -96.58        | 54.27                               | 87.71                                | 79.47                                | 0.292                          |
| <b>19</b>                 | 2.20                              | -243.49                             | -109.20       | 37.02                               | 70.24                                | 77.80                                | 0.308                          |
| <b>21</b>                 | 4.04                              | -175.87                             | -42.88        | 7.76                                | 45.36                                | 76.89                                | 9.22                           |
| <b>22</b>                 | 1.92                              | -263.37                             | -118.51       | 87.47                               | 66.82                                | 82.38                                | 14.1                           |
| <b>23</b>                 | 2.09                              | -210.72                             | -91.24        | 88.60                               | 83.27                                | 80.53                                | 8.91                           |
| <b>25</b>                 | 2.34                              | -223.24                             | -77.24        | 67.96                               | 38.36                                | 76.64                                | 2.00                           |
| <b>27</b>                 | 2.32                              | -204.06                             | -99.71        | 87.62                               | 80.47                                | 79.22                                | 2.86                           |
| <b>28</b>                 | 2.90                              | -140.71                             | -48.10        | 87.71                               | 80.42                                | 29.00                                | 2.23                           |
| <b>29</b>                 | 2.23                              | -206.94                             | -99.22        | 92.73                               | 88.18                                | 77.42                                | 0.296                          |
| <b>30</b>                 | 2.75                              | -209.82                             | -64.94        | 0.02                                | 14.64                                | 77.71                                | 0.389                          |
| <b>31-tau1</b>            | 5.92                              | -211.06                             | -32.84        | 0.00                                | 47.29                                | 51.09                                | 0.895                          |
| <b>31-tau2</b>            | 1.51                              | -207.34                             | -134.67       | 95.56                               | 1.69                                 | 69.44                                | 0.895                          |
| <b>piperazine<br/>6</b>   | 2.15                              | -212.78                             | -107.65       | 87.02                               | 73.80                                | 80.24                                | 0.233 <sup>a</sup>             |
| <b>oxadiazole,<br/>91</b> | 2.92                              | -180.32                             | -63.42        | 70.04                               | 52.24                                | 81.11                                | -                              |
| <b>4-hydroxy,<br/>92</b>  | 2.15                              | -217.61                             | -93.32        | 84.51                               | 74.04                                | 48.33                                | -                              |
| <b>azido, 93</b>          | -                                 | -                                   | -             | -                                   | -                                    | -                                    | -                              |

<sup>a</sup>Reported in Jung, Y. H. et al. Exploration of alternative scaffolds for P2Y<sub>14</sub> receptor antagonists containing a biaryl core. *J. Med. Chem.* **2020**, 63, 9563–9589.

**Table S2.** Intra-replicate average RMSD, Interaction Energy (as sum of electrostatic and van der Waals), Weighted Dynamic Scoring Function (wDSF), percentage of hydrogen bonds of Lys77<sup>2.60</sup>, Tyr102<sup>3.33</sup> and Lys277<sup>7.35</sup>, for compounds **29**, **32** and **33**.

| Compound  |                | Average values within each replicate |                               |            |                                  |                                   |                                   |
|-----------|----------------|--------------------------------------|-------------------------------|------------|----------------------------------|-----------------------------------|-----------------------------------|
|           |                | RMSD (Å)                             | Interaction Energy (kcal/mol) | Slope wDSF | Lys77 <sup>2.60</sup> (% hbonds) | Tyr102 <sup>3.33</sup> (% hbonds) | Lys277 <sup>7.35</sup> (% hbonds) |
| <b>29</b> | <b>run1</b>    | 1.99                                 | -210.51                       | -117.02    | 93.60                            | 89.60                             | 74.53                             |
|           | <b>run2</b>    | 2.39                                 | -204.78                       | -92.71     | 90.93                            | 84.47                             | 76.80                             |
|           | <b>run3</b>    | 2.30                                 | -205.52                       | -87.92     | 93.67                            | 90.47                             | 80.93                             |
|           | <b>average</b> | 2.23                                 | -206.94                       | -99.22     | 92.73                            | 88.18                             | 77.42                             |
| <b>32</b> | <b>run1</b>    | 2.23                                 | -196.17                       | -89.77     | 89.00                            | 75.33                             | 26.00                             |
|           | <b>run2</b>    | 2.12                                 | -220.47                       | -107.67    | 74.00                            | 86.87                             | 80.13                             |
|           | <b>run3</b>    | 1.85                                 | -217.20                       | -104.66    | 69.27                            | 79.60                             | 81.00                             |
|           | <b>average</b> | 2.07                                 | -211.28                       | -100.70    | 77.42                            | 80.60                             | 62.38                             |
| <b>33</b> | <b>run1</b>    | 2.76                                 | -151.94                       | -58.53     | 94.00                            | 67.47                             | 0.73                              |
|           | <b>run2</b>    | 7.31                                 | -155.58                       | -11.72     | 0.00                             | 50.60                             | 1.20                              |
|           | <b>run3</b>    | 3.51                                 | -138.78                       | -23.08     | 85.87                            | 59.93                             | 1.47                              |
|           | <b>average</b> | 4.53                                 | -148.77                       | -31.11     | 59.96                            | 59.33                             | 1.13                              |

**Table S3.** Reversal of CCI-induced mechano-allodynia in the mouse by P2Y<sub>14</sub>R antagonists.

| Compound<br>(10 $\mu$ mol/kg,<br>i.p.) | Effects at 30 min<br>(%Reversal $\pm$ SD) | Effects at 1 h<br>(%Reversal $\pm$ SD) | Effects at 2 h<br>(%Reversal $\pm$ SD) | Effects at 3 h<br>(%Reversal $\pm$ SD) | Effects at 5 h<br>(%Reversal $\pm$ SD) | IC <sub>50</sub><br>(mP2Y <sub>14</sub> ,<br>nM) | MW<br>(D) |
|----------------------------------------|-------------------------------------------|----------------------------------------|----------------------------------------|----------------------------------------|----------------------------------------|--------------------------------------------------|-----------|
| <b>1a<sup>a</sup></b>                  | 87.9 $\pm$ 12.9                           | 100 $\pm$ 0.0                          | 96.4 $\pm$ 6.2                         | 78.6 $\pm$ 9.4                         | 21.3 $\pm$ 14.1                        | 21.6 $\pm$ 7.0                                   | 475.5     |
| <b>1b<sup>a</sup></b>                  | 83.3 $\pm$ 9.6                            | 100 $\pm$ 0.0                          | 100 $\pm$ 0.0                          | 92.4 $\pm$ 8.7                         | 40.7 $\pm$ 7.5                         | 29.7 $\pm$ 9.3                                   | 517.6     |
| <b>3a<sup>a</sup></b>                  | 52.4 $\pm$ 9.6                            | 67.4 $\pm$ 7.0                         | 57.2 $\pm$ 13.3                        | 31.9 $\pm$ 16.8                        | 12.7 $\pm$ 13.2                        | 142 $\pm$ 58                                     | 492.5     |
| <b>32</b>                              | 41.5 $\pm$ 13.4                           | 71.0 $\pm$ 17.4                        | 34.9 $\pm$ 18.4                        | 15.7 $\pm$ 14.4                        | 0.0 $\pm$ 0.0                          | 18.6 $\pm$ 8.4                                   | 489.5     |

<sup>a</sup> Data published in Mufti et al.<sup>1</sup> IC<sub>50</sub> values are from the fluorescent binding assay, as described in the main text.

1. Mufti, F.; Jung, Y. H.; Giancotti, L. A.; Yu, J.; Chen, Z.; Phung, N. B.; Jacobson, K. A.; Salvemini, D. P2Y<sub>14</sub> receptor antagonists reverse chronic neuropathic pain in a mouse model. *ACS Med. Chem. Lett.* **2020**, *11*, 1281–1286.

Commercially available precursors (corresponding antagonist derivative):

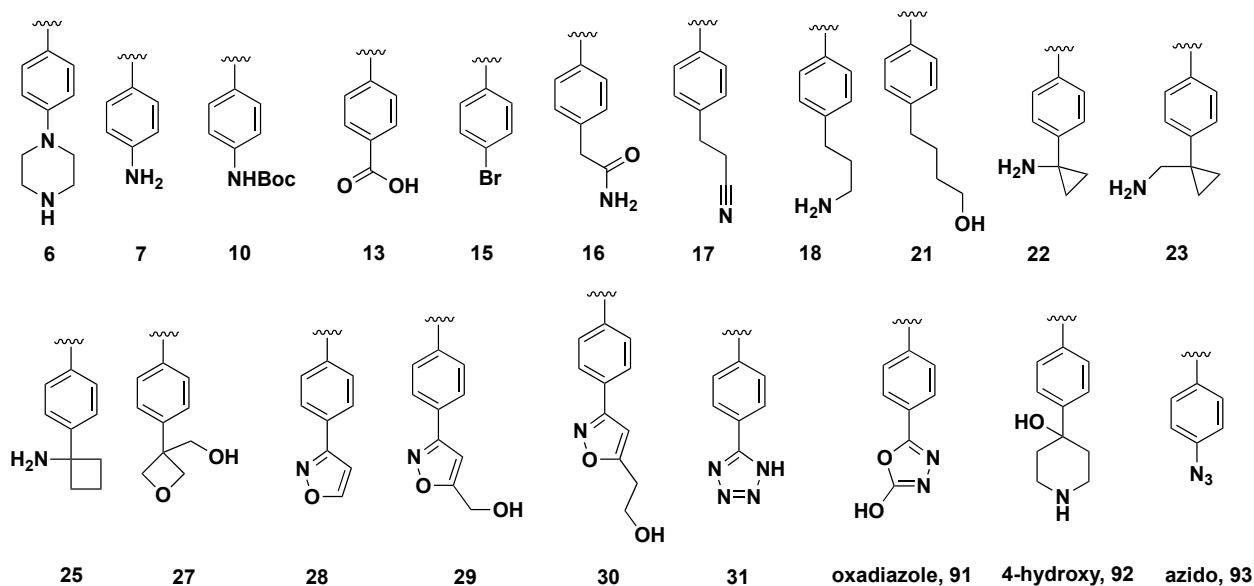

Synthesized easily using commercial precursors:

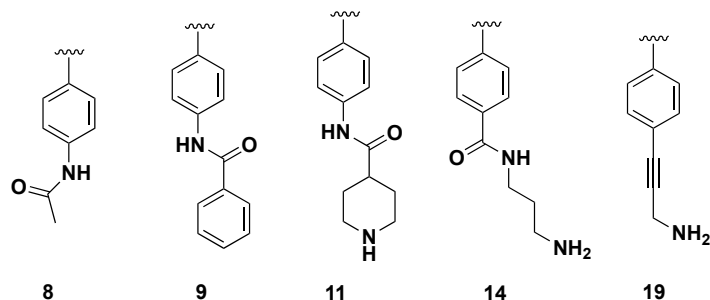

**Figure S1.** R-groups corresponding to 20 commercially available bromo-aryl precursors and 5 R-groups easily obtainable by chemical synthesis starting from commercial precursors. These R-groups were used to build a library of compounds of the triazole series, which was submitted to molecular modeling evaluation to prioritize the synthesis. The compound bearing the azido substituent was not subjected to MD simulations because of lack of parameters for the azido group.

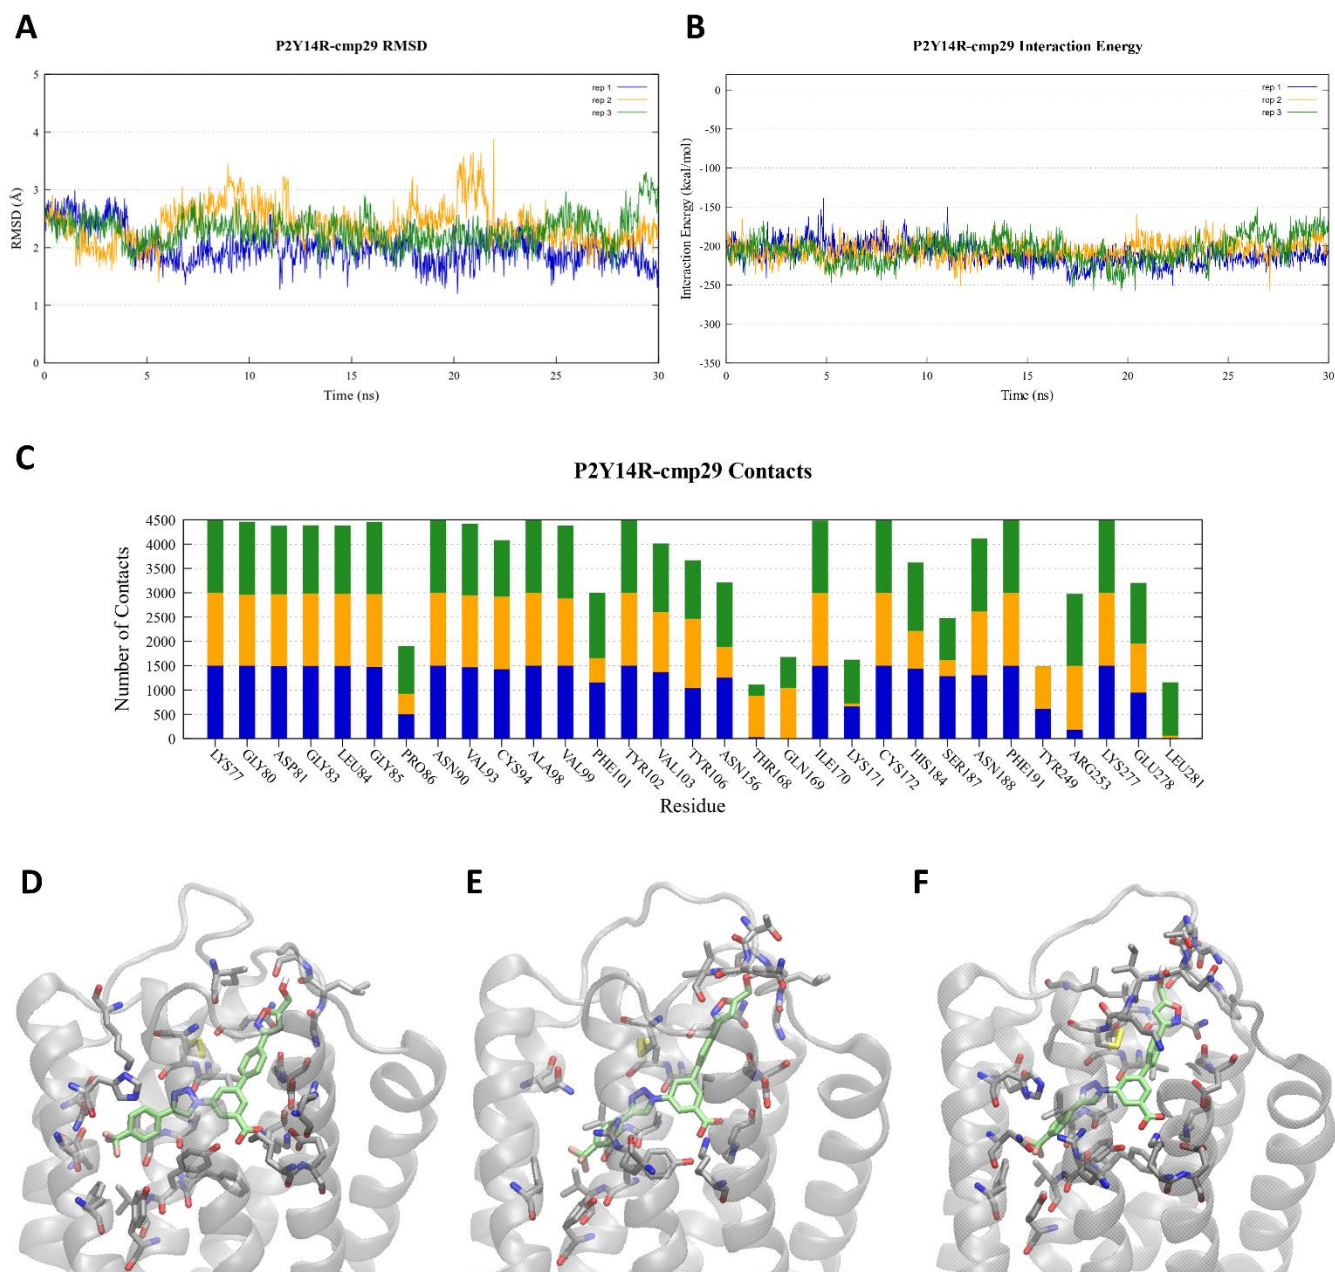

**Figure S2.** Results of the MD simulations of the complex between hP2Y<sub>14</sub>R and compound **29**. **A)** RMSD of ligand heavy atoms relative to the docking pose, after superposition of the protein C $\alpha$  atoms to the starting position. **B)** Ligand-receptor interaction energy (as sum of electrostatic and van der Waals components). **C)** Number of contacts (distance  $\leq 4$  Å) between ligand and receptor residues. Residues in contact with the ligand for more than half of the simulation in at least one replicate are reported. A stride of 20 ps was employed, so a maximum of 1500 contacts (frames) can be observed for each replicate. **D**, **E** and **F)** Last frame of replicates 1-2-3. The receptor is reported in gray and the ligand in lime.

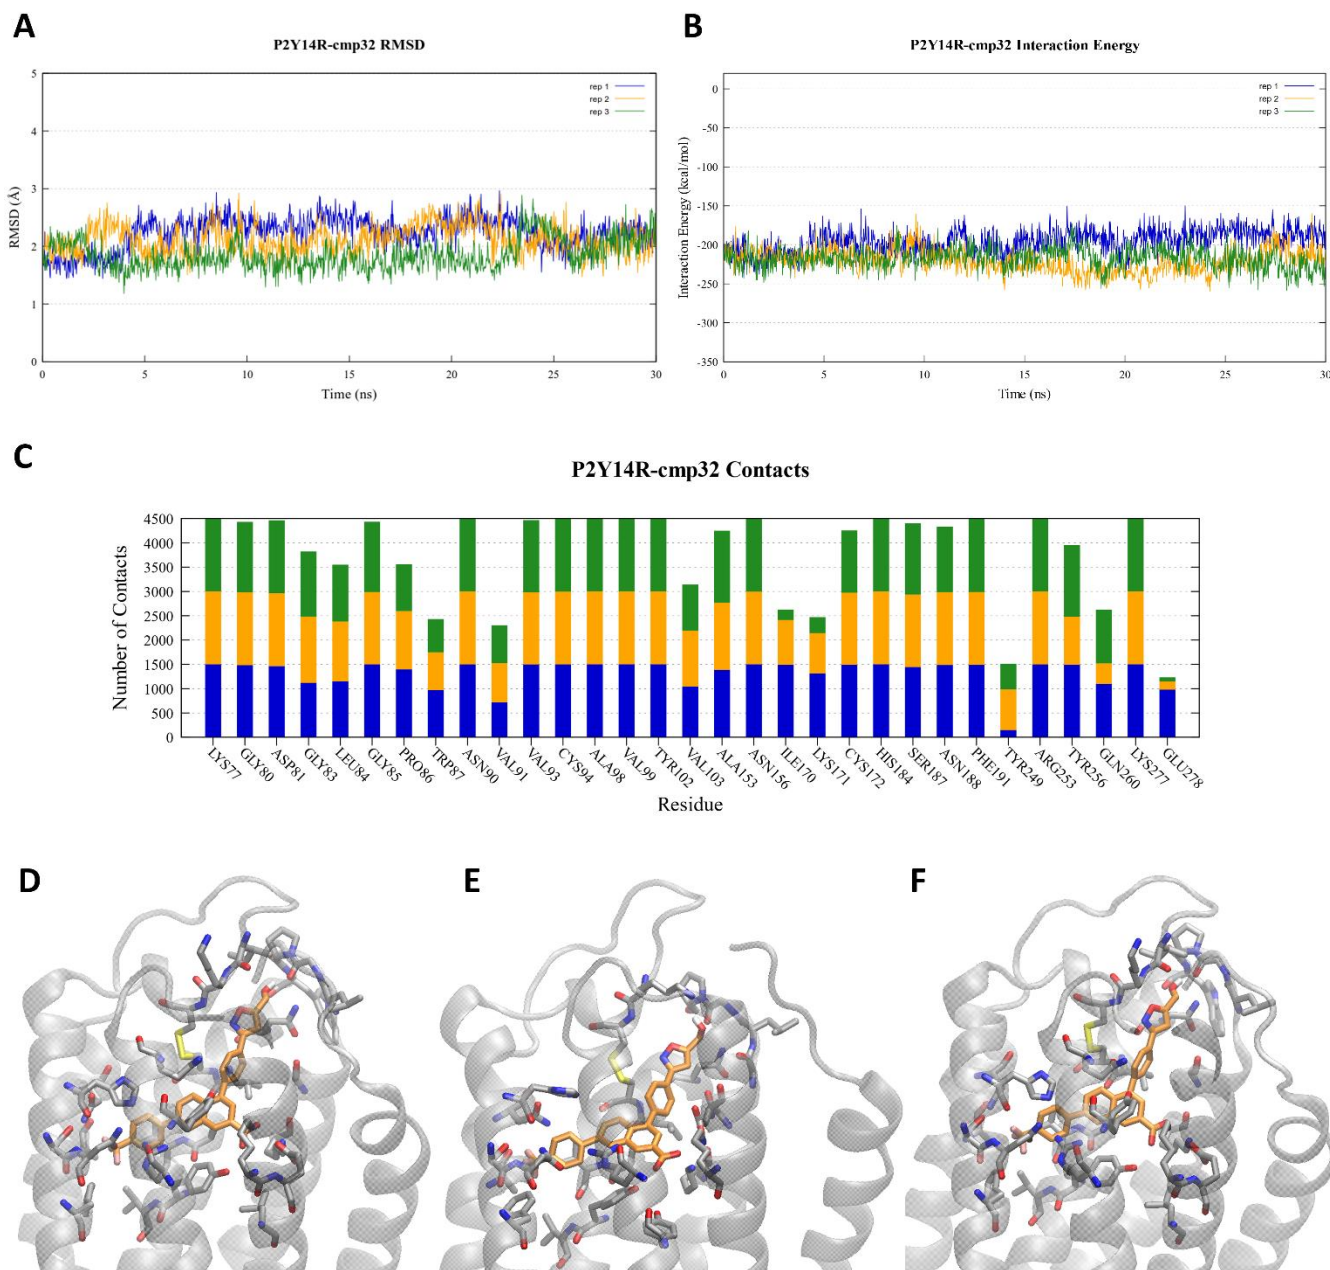

**Figure S3.** Results of the MD simulations of the complex between hP2Y<sub>14</sub>R and compound **32**. **A**) RMSD of ligand heavy atoms relative to the docking pose, after superposition of the protein C $\alpha$  atoms to the starting position. **B**) Ligand-receptor interaction energy (as sum of electrostatic and van der Waals components). **C**) Number of contacts (distance  $\leq 4$  Å) between ligand and receptor residues. Residues in contact with the ligand for more than half of the simulation in at least one replicate are reported. A stride of 20 ps was employed, so a maximum of 1500 contacts (frames) can be observed for each replicate. **D**, **E** and **F**) Last frame of replicates 1-2-3. The receptor is reported in gray and the ligand in orange.

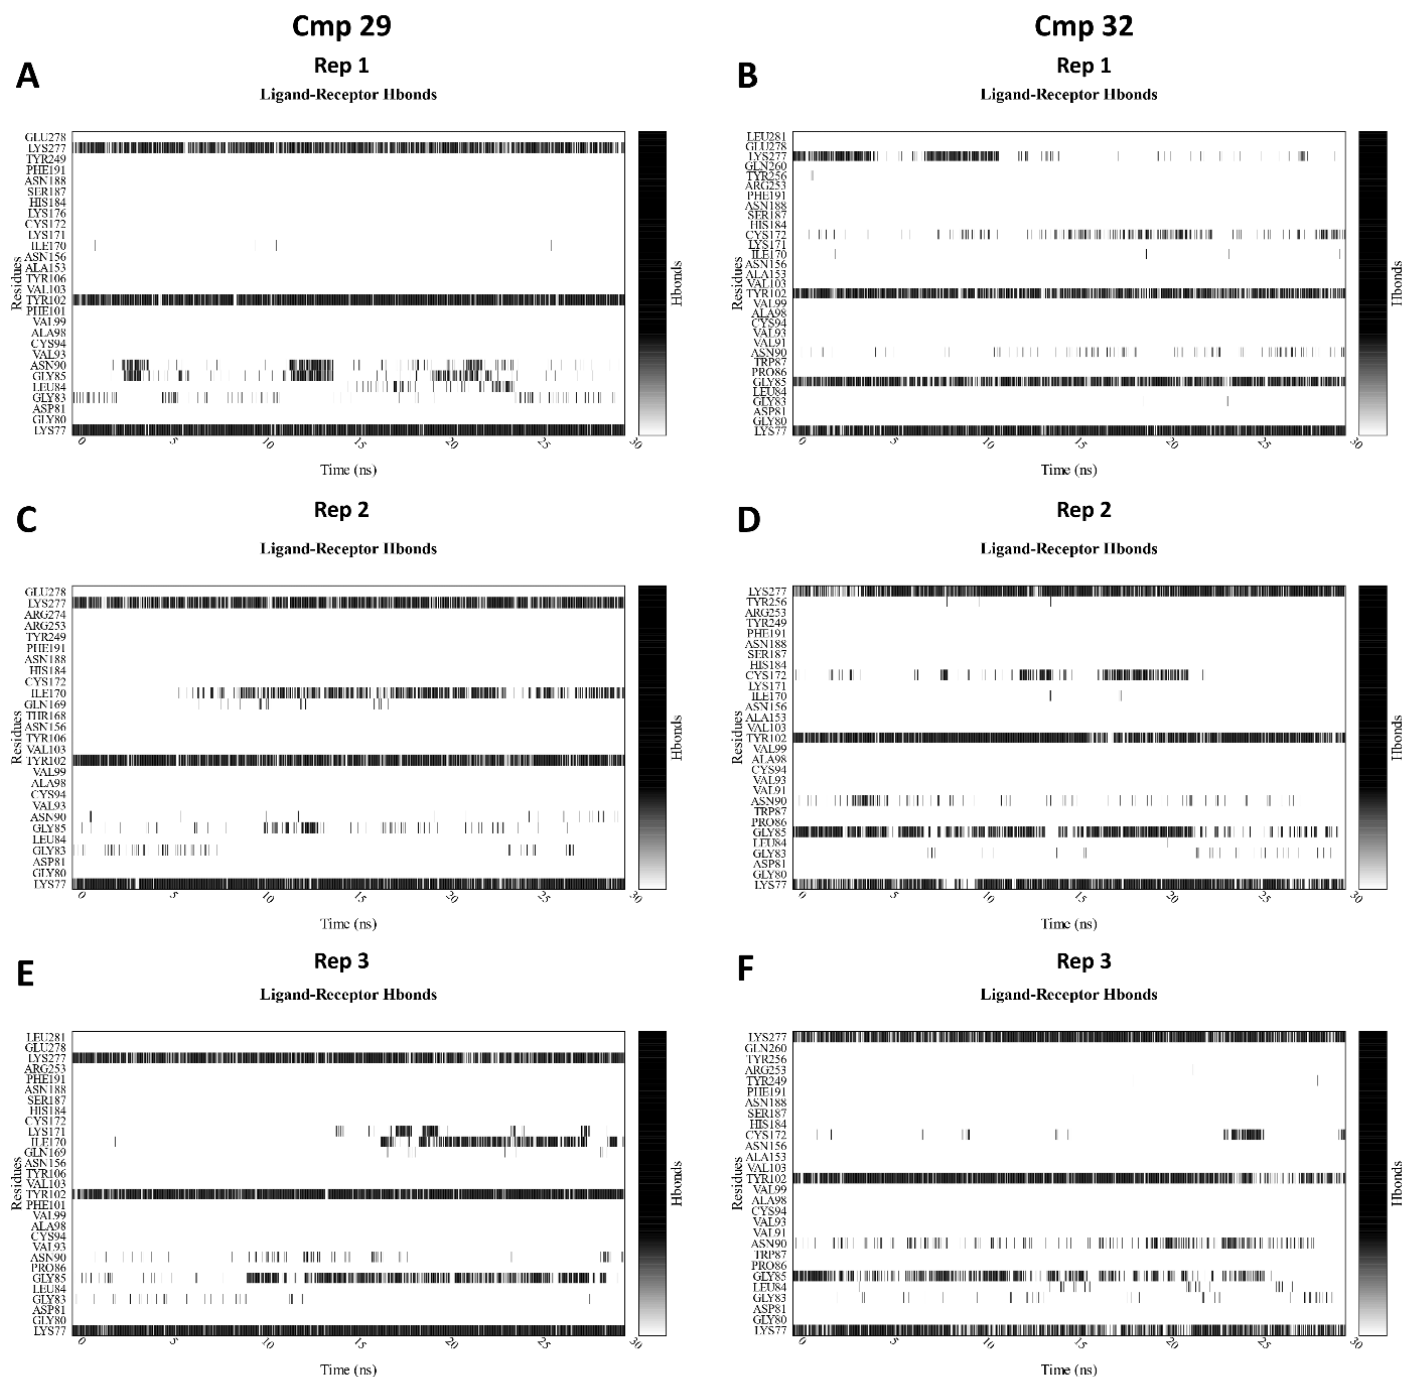

**Figure S4.** Ligand-receptor hydrogen bonds during 30 ns MD simulations. Residues that are in contact (distance  $\leq 4 \text{ \AA}$ ) with the ligand for more than half of the simulation are shown. The panels on the left (A, C and E) are relative to compound 29 (replicates 1, 2 and 3), while panels on the right (B, D and F) are relative to compound 32 (replicates 1, 2 and 3).

**Figure S4**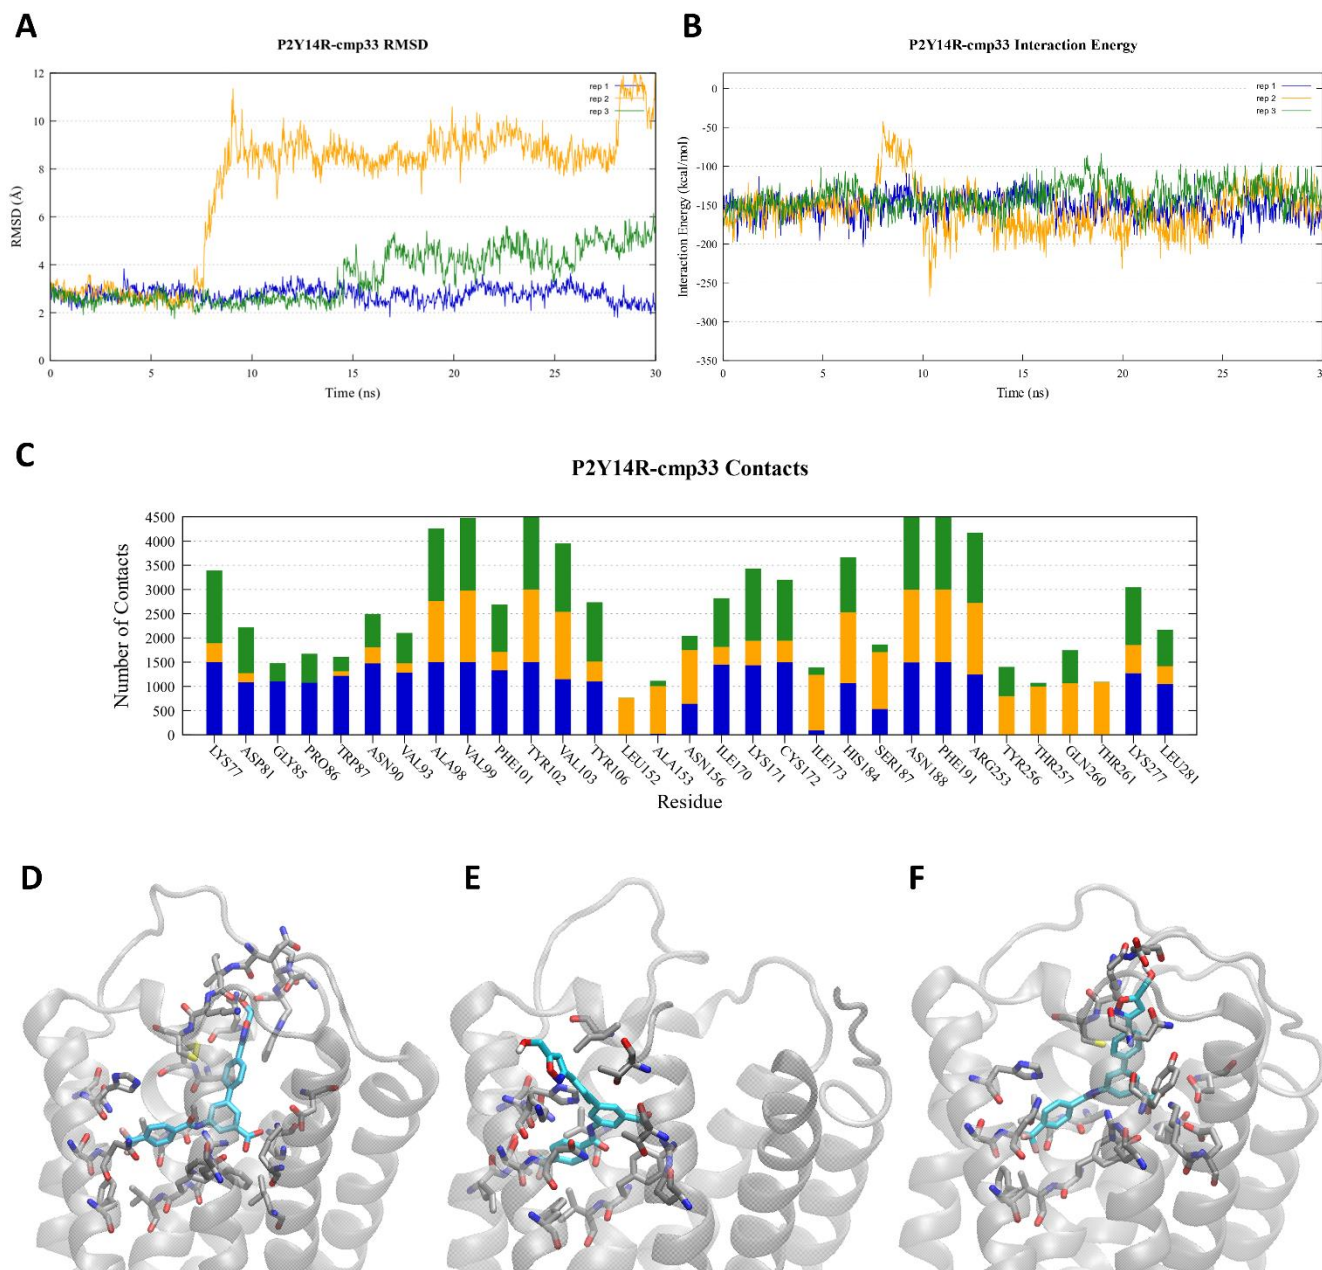

**Figure S5.** Results of the MD simulations of the complex between hP2Y<sub>14</sub>R and compound **33**. **A**) RMSD of ligand heavy atoms relative to the docking pose, after superposition of the protein C $\alpha$  atoms to the starting position. **B**) Ligand-receptor interaction energy (as sum of electrostatic and van der Waals components). **C**) Number of contacts (distance  $\leq 4$  Å) between ligand and receptor residues. Residues in contact with the ligand for more than half of the simulation in at least one replicate are reported. A stride of 20 ps was employed, so a maximum of 1500 contacts (frames) can be observed for each replicate. **D**, **E** and **F**) Last frame of replicates 1-2-3. The receptor is reported in gray and the ligand in cyan.

Off-target activity:

**Determined by the the Psychoactive Drug Screening Program (PDSP)**

We thank Dr. Bryan L. Roth (Univ. North Carolina at Chapel Hill) and National Institute of Mental Health's Psychoactive Drug Screening Program (Contract # HHSN-271-2008-00025-C) for screening data. Reference: Besnard, J.; Ruda, G. F.; Setola, V.; Abecassis, K.; Rodriguez, R. M.; Huang, X. P.; Norval, S.; Sassano, M. F.; Shin, A. I.; Webster, L. A.; Simeons, F. R.; Stojanovski, L.; Prat, A.; Seidah, N. G.; Constan, D. B.; Bickerton, G. R.; Read, K. D.; Wetsel, W. C.; Gilbert, I. H.; Roth, B. L.; Hopkins, A. L. Automated design of ligands to polypharmacological profiles. *Nature* **2012**, 492, 215–220.

Procedures: <https://pdsp.unc.edu/pdspweb/content/UNC-CH%20Protocol%20Book.pdf>

Unless noted in the text, no significant interactions (<50% inhibition at 10  $\mu$ M) for any of the nucleosides were found at the following sites (human unless noted): 5HT<sub>1A</sub>, 5HT<sub>1B</sub>, 5HT<sub>1D</sub>, 5HT<sub>1E</sub>, 5HT<sub>2A</sub>, 5HT<sub>2B</sub>, 5HT<sub>2C</sub>, 5HT<sub>3</sub>, 5HT<sub>5A</sub>, 5HT<sub>6</sub>, 5HT<sub>7</sub>,  $\alpha_{1A}$ ,  $\alpha_{1B}$ ,  $\alpha_{1D}$ ,  $\alpha_{2A}$ ,  $\alpha_{2B}$ ,  $\alpha_{2C}$ ,  $\beta_1$ ,  $\beta_2$ ,  $\beta_3$ , BZP rat brain site, D<sub>1</sub>, D<sub>2</sub>, D<sub>3</sub>, D<sub>4</sub>, D<sub>5</sub>, GABA<sub>A</sub>, H<sub>1</sub>, H<sub>2</sub>, H<sub>3</sub>, H<sub>4</sub>, M<sub>1</sub>, M<sub>2</sub>, M<sub>5</sub>,  $\delta$ -opioid receptor (DOR),  $\kappa$ -opioid receptor (KOR),  $\mu$ -opioid receptor (MOR),  $\sigma_1$ ,  $\sigma_2$ , DAT, NET, SERT. K<sub>i</sub> values in  $\mu$ M, or % inhibition at 10  $\mu$ M, are given. Representative curves are shown in Fig. S6.

Results shown as: receptor, K<sub>i</sub>,  $\mu$ M or % inhibition at 10  $\mu$ M.

**1a**, PPTN (PDSP 37482): (in earlier paper)<sup>1,2</sup>

**1b**, N-Ac-PPTN (PDSP 55252): (in earlier paper)<sup>2</sup>

**1c**, N-formyl-PPTN (PDSP 58298): 5HT<sub>1D</sub> 81%;  $\alpha_{1B}$ , 2.65;  $\alpha_{2A}$  3.97;  $\alpha_{2B}$  82%;  $\alpha_{2C}$  3.93; D<sub>1</sub> 0.52, D<sub>5</sub> 1.44;  $\sigma_1$  0.759,  $\sigma_2$  84%, H<sub>4</sub>, 1.70.

**1d**, N-CF<sub>3</sub>CO-PPTN: not submitted.

**3a**, MRS4217 (PDSP 37481): (in earlier paper)<sup>1,2</sup>

**6**, MRS4544 (PDSP 53888): (in earlier paper)<sup>2</sup>

**11**, MRS4681 (PDSP 55946):  $\sigma_1$ , 2.33 $\pm$ 0.15; DOR, 2.0 $\pm$ 0.38.

**13**, MRS4678 (PDSP 57280): none detected.

**16**, MRS4594 (PDSP 53890):  $\sigma_2$  0.931 $\pm$ 0.388; TSPO, 2.81 $\pm$ 0.18.

**18**, MRS4635 (PDSP 55841): none detected.

**19**, MRS4698 (PDSP 56449): none detected.

**29**, MRS4586 (PDSP 53889): DOR, 6.9 $\pm$ 1.9; H<sub>1</sub>, 2.65 $\pm$ 0.74; TSPO, 0.751 $\pm$ 0.101.

**30**, MRS4702 (PDSP 57282): DOR, 2.15, TSPO, 1.93.

**31**, MRS4683 (PDSP 57281): DOR, 3.30 $\pm$ 1.76;  $\sigma_2$ , 2.26 $\pm$ 1.28.

**32**, MRS4654 (PDSP 56758):  $\sigma_1$  2.68 $\pm$ 0.21;  $\sigma_2$  4.78 $\pm$ 0.99; TSPO 4.63 $\pm$ 0.87.

**37a**, MRS4543 (PDSP 57573): 5HT<sub>1D</sub>, 2.39; 5HT<sub>1B</sub>, 5.57; 5HT<sub>5A</sub>, 2.04; 5HT<sub>7A</sub>, 2.22; D<sub>1</sub> 1.22; D<sub>3</sub>, 0.84; D<sub>5</sub>, 3.01; H<sub>2</sub>, 54%;  $\alpha_{1A}$ , 1.23;  $\alpha_{1B}$ , 2.52;  $\alpha_{2B}$ , 1.81;  $\alpha_{2C}$ , 0.790;  $\sigma_1$ , 0.133;  $\sigma_2$ , 0.23; M<sub>5</sub>, 2.23;  $\beta_2$ , 4.18;  $\beta_3$ , 1.24; DAT 0.165; SERT, 1.80; NET, 0.469.

**37c**, MRS4741 (PDSP 57574):  $\sigma_2$ , 0.585 $\pm$ 0.125.

References:

1. Yu, J.; Ciancetta, A.; Dudas, S.; Duca, S.; Lottermoser, J.; Jacobson, K. A. Structure-guided modification of heterocyclic antagonists of the P2Y<sub>14</sub> receptor. *J. Med. Chem.* **2018**, 61, 4860–4882, doi: 10.1021/acs.jmedchem.8b00168.
2. Jung, Y. H.; Yu, J.; Wen, Z.; Salmaso, V.; Phung, N. B.; Karcz, T.; Chen, Z.; Duca, S.; Bennett, J. M.; Dudas, S.; Cook, D. N.; Salvemini, D.; Gao, Z. G.; Jacobson, K. A. Exploration of alternative scaffolds for P2Y<sub>14</sub> receptor antagonists containing a biaryl core. *J. Med. Chem.* **2020**, 63, 9563–9589.

**Figure S6.** Binding curves for selected off-target assays performed by the PDSP. A. Binding enhancement at  $\alpha_2\text{AR}$  by compound **29**. B. Binding enhancement at  $\alpha_2\text{AR}$  by compound **16**. C. TSPO binding inhibition by compound **30**.

A

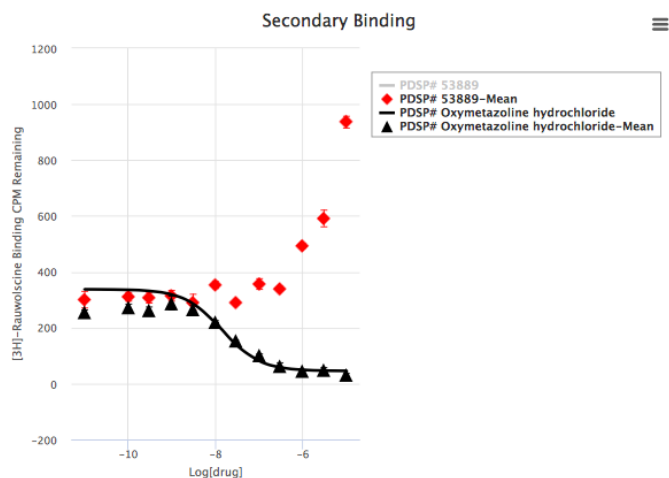

B

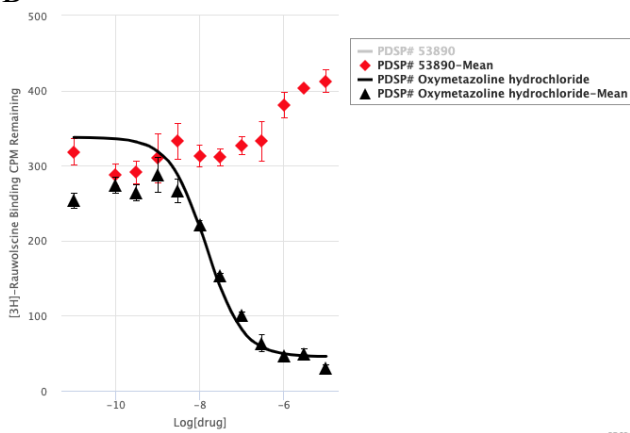

C

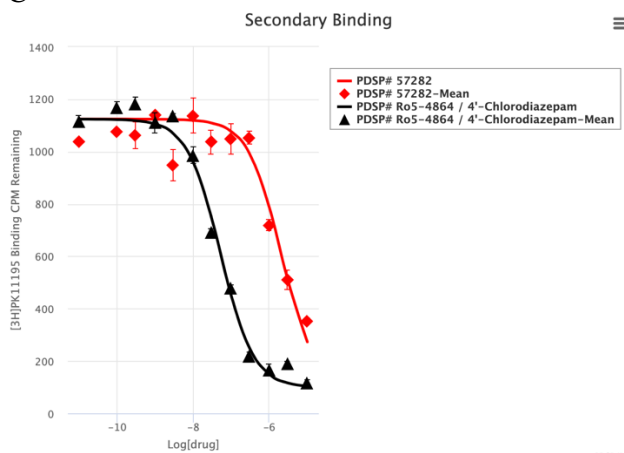

**Figure S7A.** Hydrolytic stability of the prodrug **37a** in the absence of PLE. HPLC traces of **3a** (active drug alone) and **37a** (prodrug alone), and of **37a** following incubation at pH 7.4 and 37 °C for 24 h.

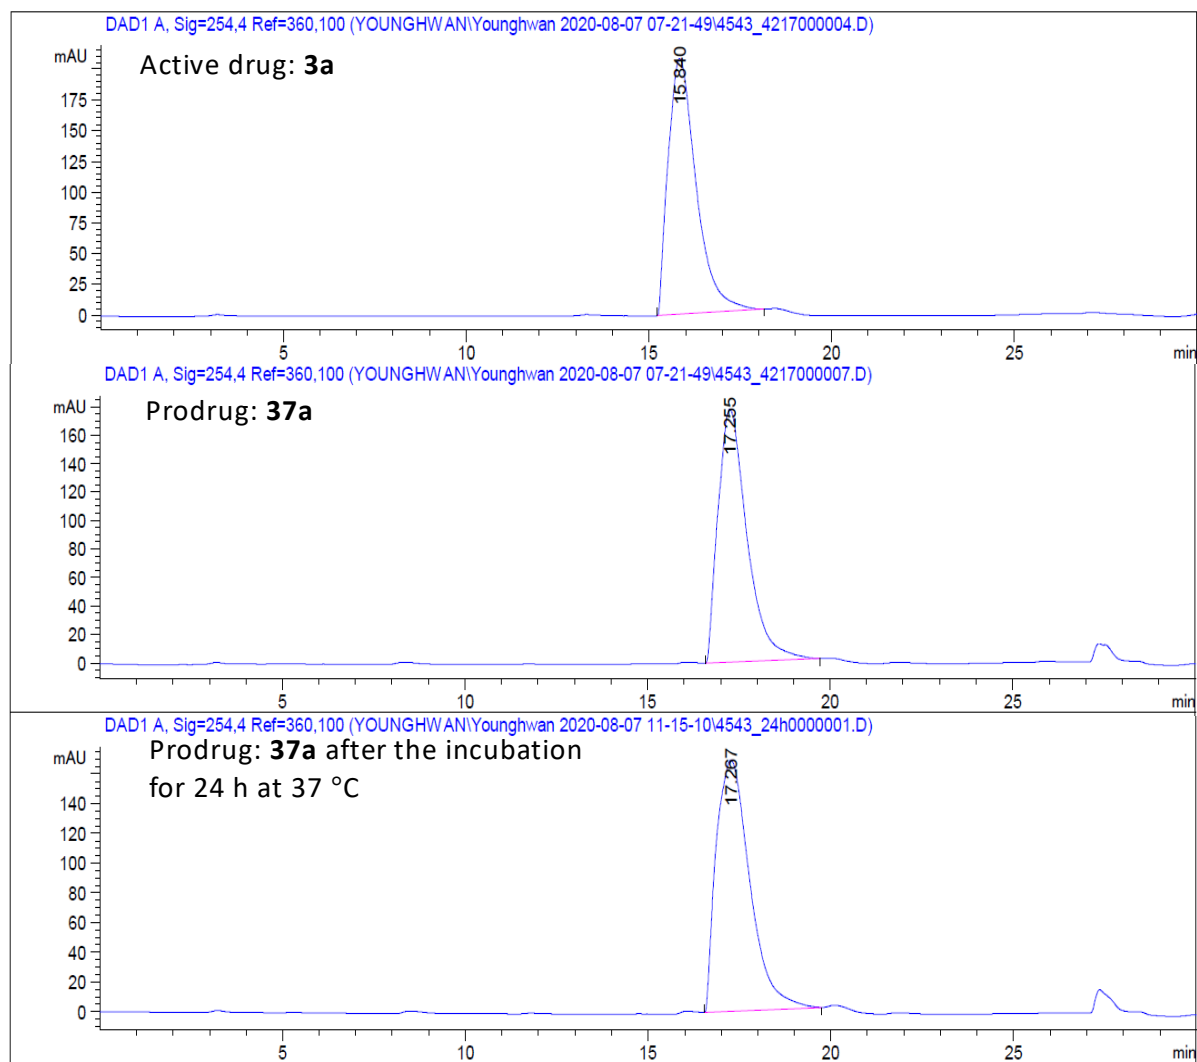

**Figure S7B.** Enzymatic hydrolysis of the prodrug **37a** to produce active drug **3a**. HPLC traces of **37a** after the reaction with PLE for 5, 35, 65, and 120 min at 37 °C.

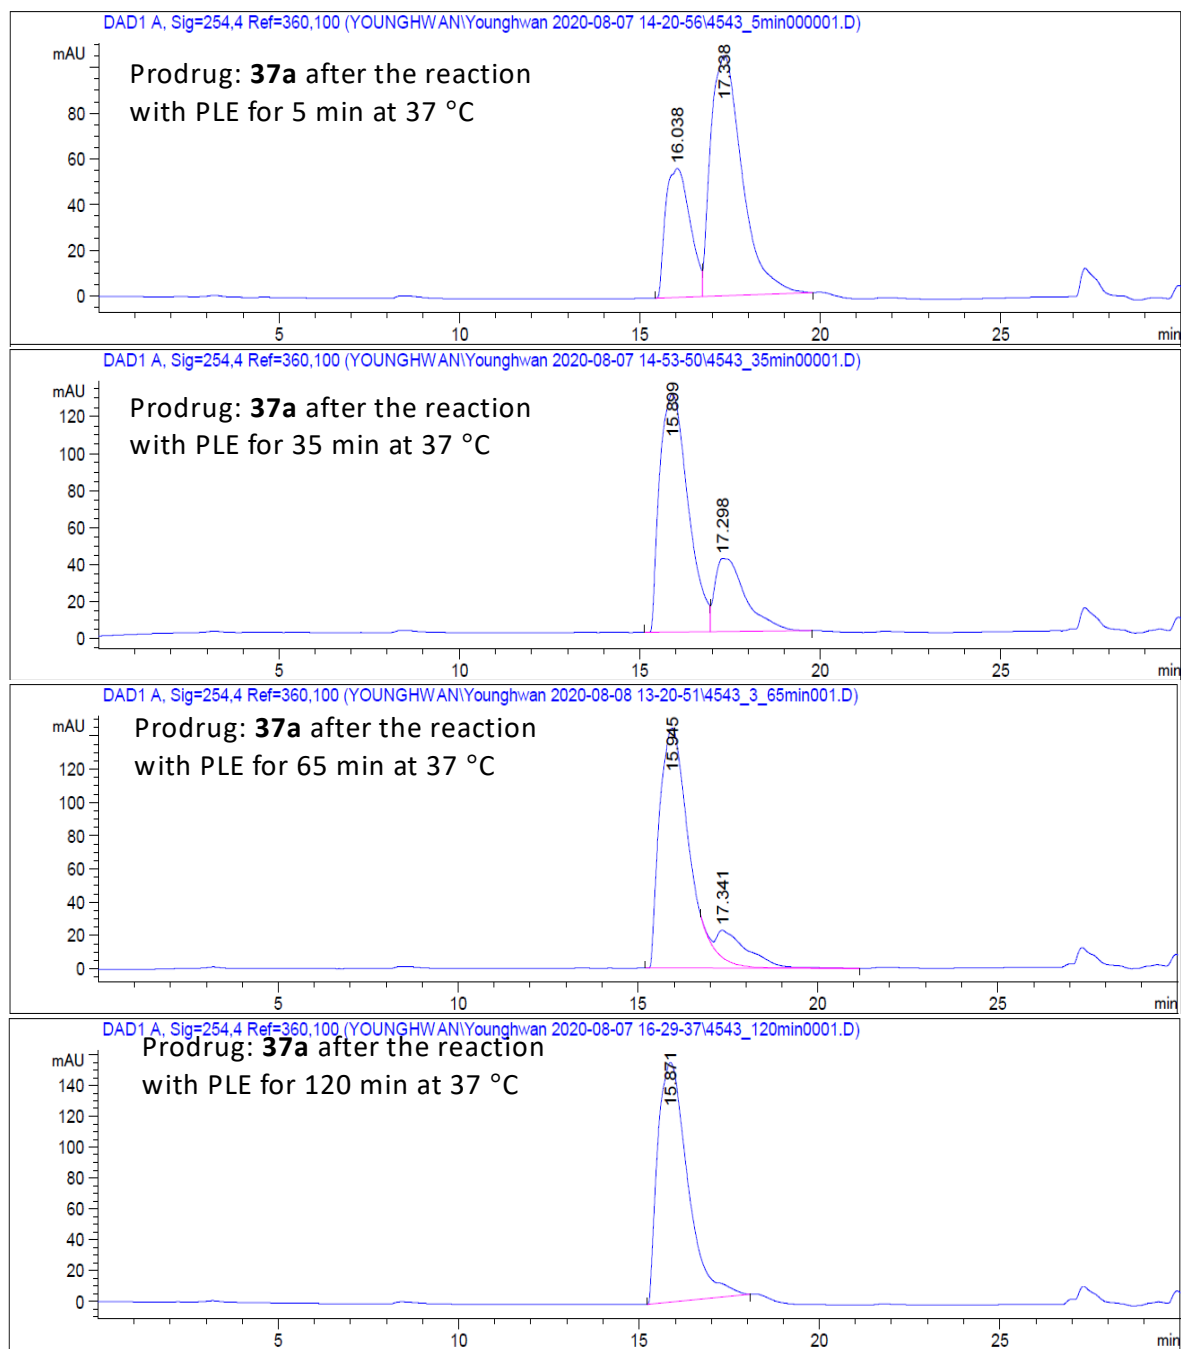

**Figure S7C.** Enzymatic hydrolysis of the prodrug **37a** to produce active drug **3a**. The half-life of **37a** by the reaction with PLE was  $20.20 \pm 1.85$  min (Mean  $\pm$  SEM).

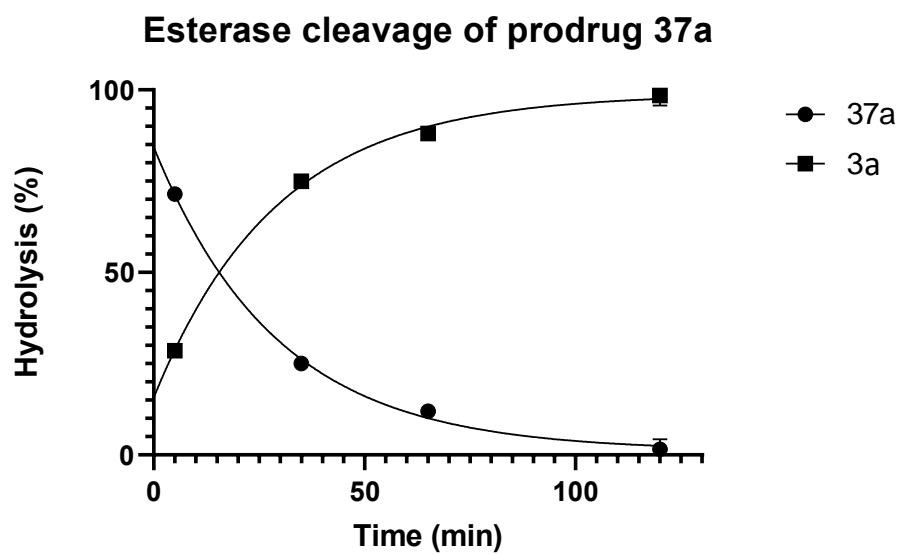

**Figure S8A.** Hydrolytic stability of the prodrug **37b** in the absence of PLE. HPLC traces of **32** (active drug alone) and **37b** (prodrug alone), and of **37b** following incubation at pH 7.4 and 37 °C for 24 h.

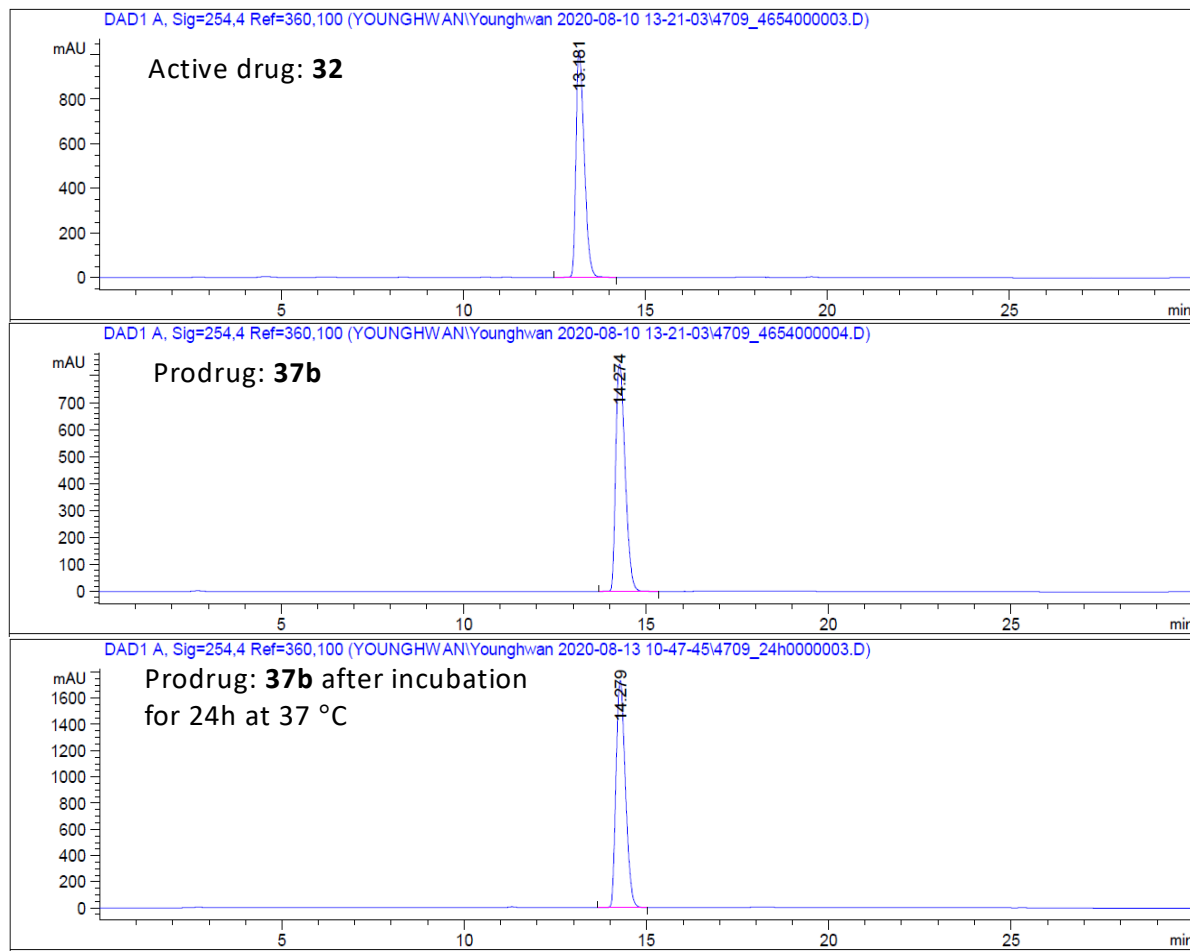

**Figure S8B.** Enzymatic hydrolysis of the prodrug **37b**. HPLC traces of **37b** after the reaction with PLE for 0, 2, 6, 24, 48, and 72 h at 37 °C.

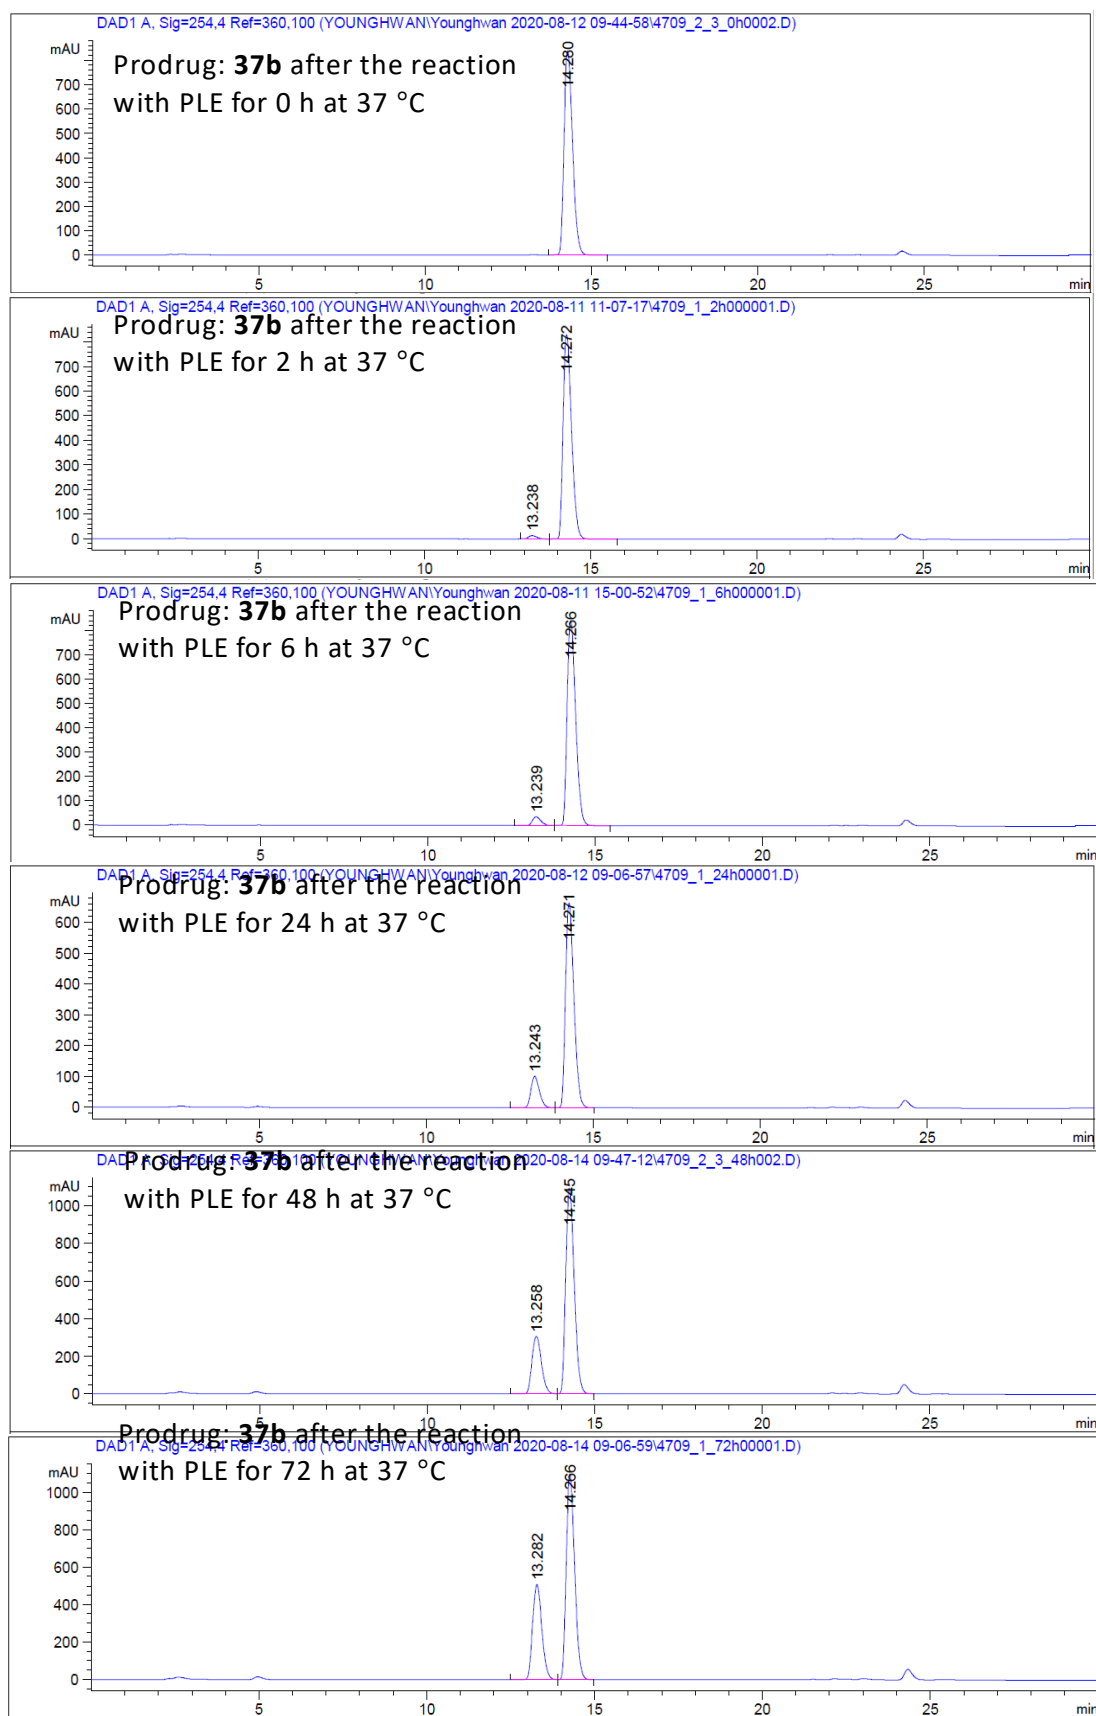

**Figure S8C.** Enzymatic hydrolysis of the prodrug **37b**. Mean  $\pm$  SD is shown.

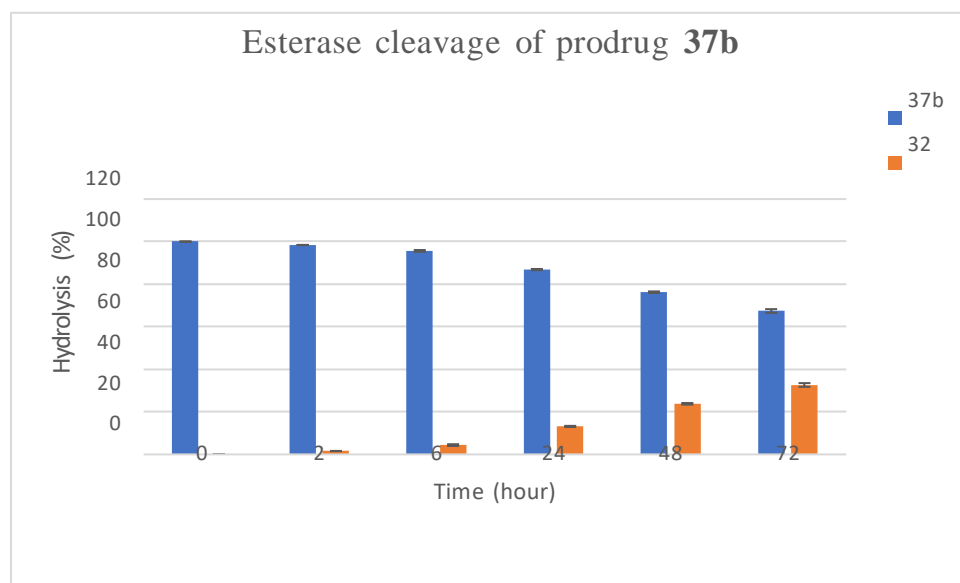

**Figure S9A.** Hydrolytic stability of the prodrug **37c** in the absence of PLE. HPLC traces of **1b** (active drug alone) and **37c** (prodrug alone), and of **37c** following incubation at pH 7.4 and 37 °C for 24 h.

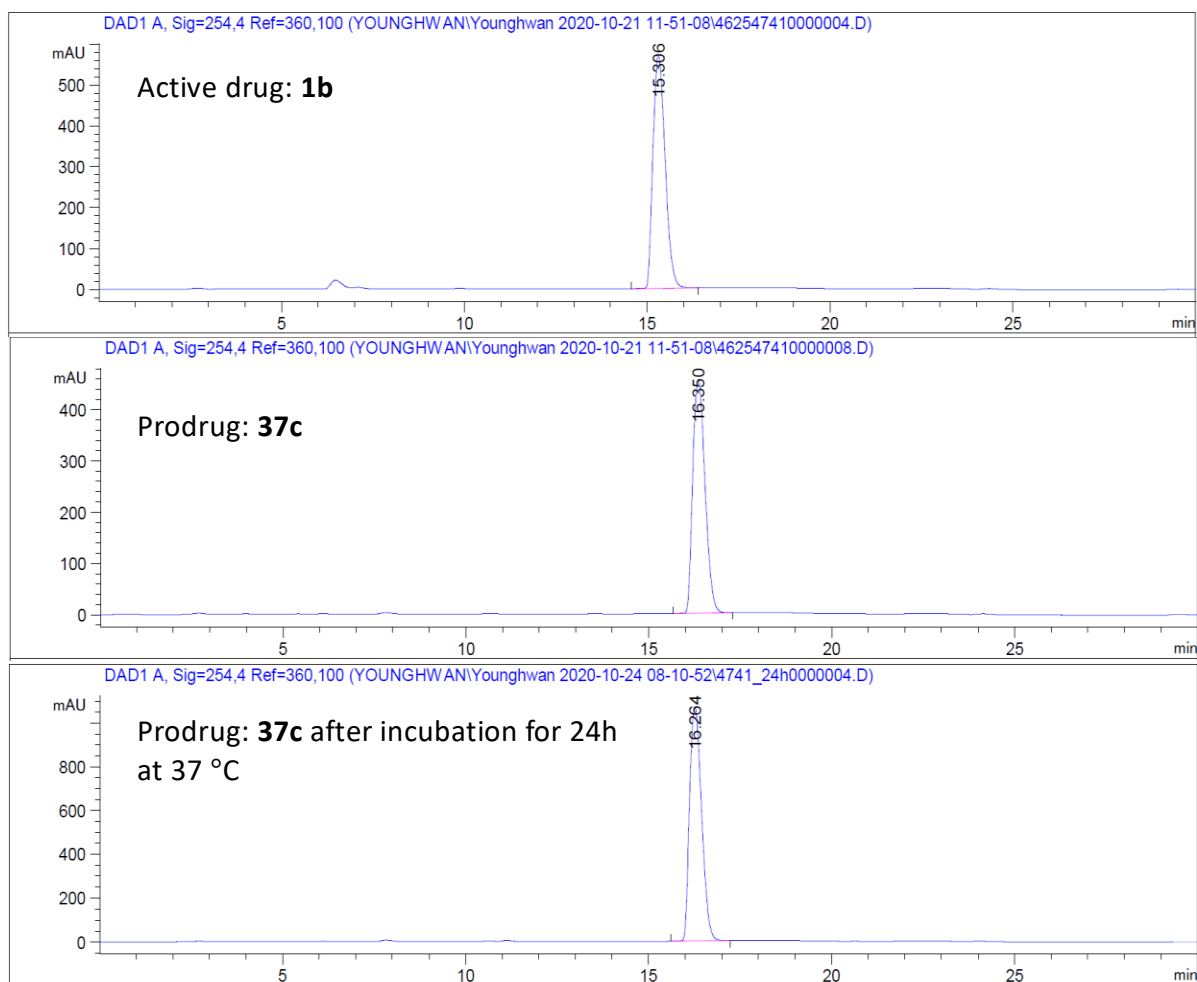

**Figure S9B.** Enzymatic hydrolysis of the prodrug **37c**. HPLC traces of **37c** after the reaction with PLE for 0, 2, 6, 24, 48, and 72 h at 37 °C.

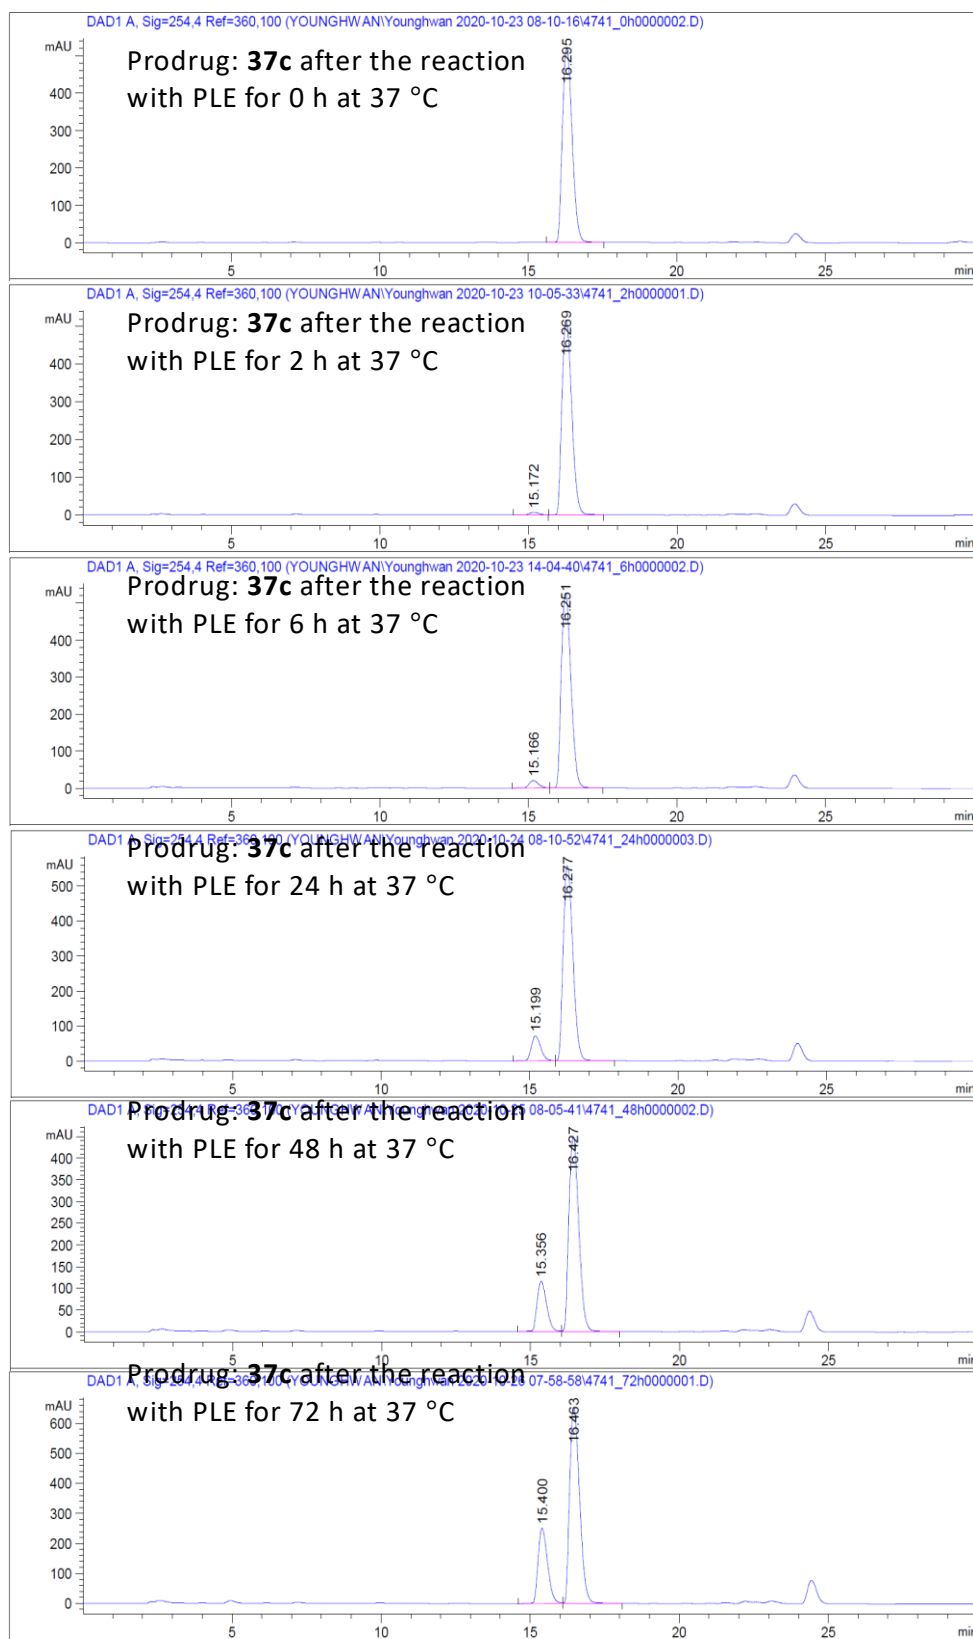

**Figure S9C.** Enzymatic hydrolysis of the prodrug **37c**. Mean  $\pm$  SD is shown.

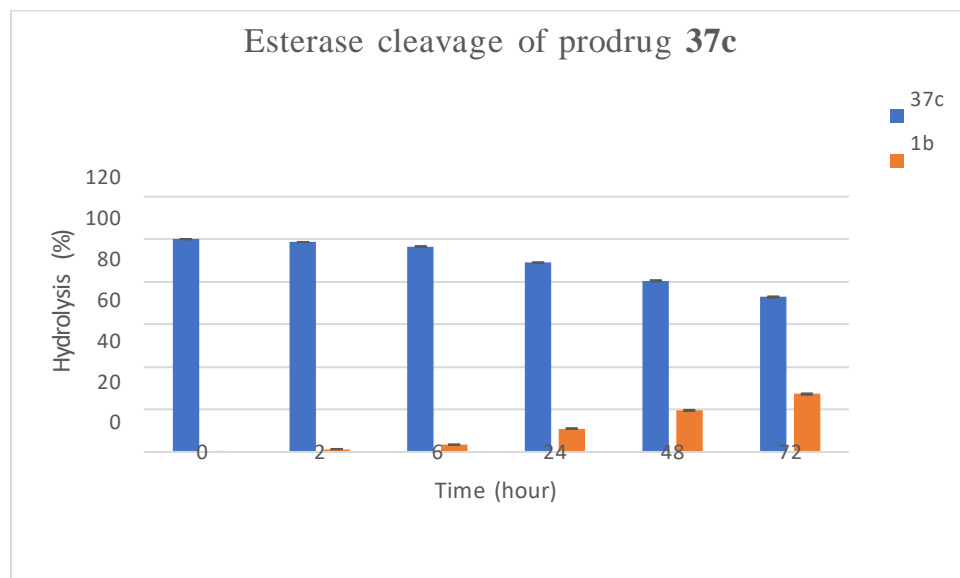

4-(4-(1-Formylpiperidin-4-yl)phenyl)-7-(4-(trifluoromethyl)phenyl)-2-naphthoic acid (**1c**).

## Elemental Composition Report

## Single Mass Analysis

Tolerance = 5.0 mDa / DBE: min = -1.5, max = 100.0

Element prediction: Off

Number of isotope peaks used for i-FIT = 3

Monoisotopic Mass, Even Electron Ions

55 formula(e) evaluated with 1 results within limits (up to 50 closest results for each mass)

Elements Used:

C: 0-100 H: 0-250 N: 1-1 O: 0-10 F: 3-3

JYH-300CT20-396-1 202 (3.434) AM2 (Ar:25000.0,0.00,0.00); ABS

TOF MS ES+

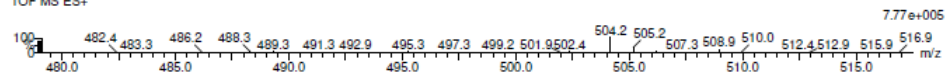

Minimum: -1.5  
Maximum: 5.0 5.0 100.0

| Mass     | Calc. Mass | mDa | PPM | DBE  | 1-FIT | Norm | Conf (%) | Formula         |
|----------|------------|-----|-----|------|-------|------|----------|-----------------|
| 504.1792 | 504.1787   | 0.5 | 1.0 | 17.5 | 377.0 | n/a  | n/a      | C30 H25 N O3 F3 |

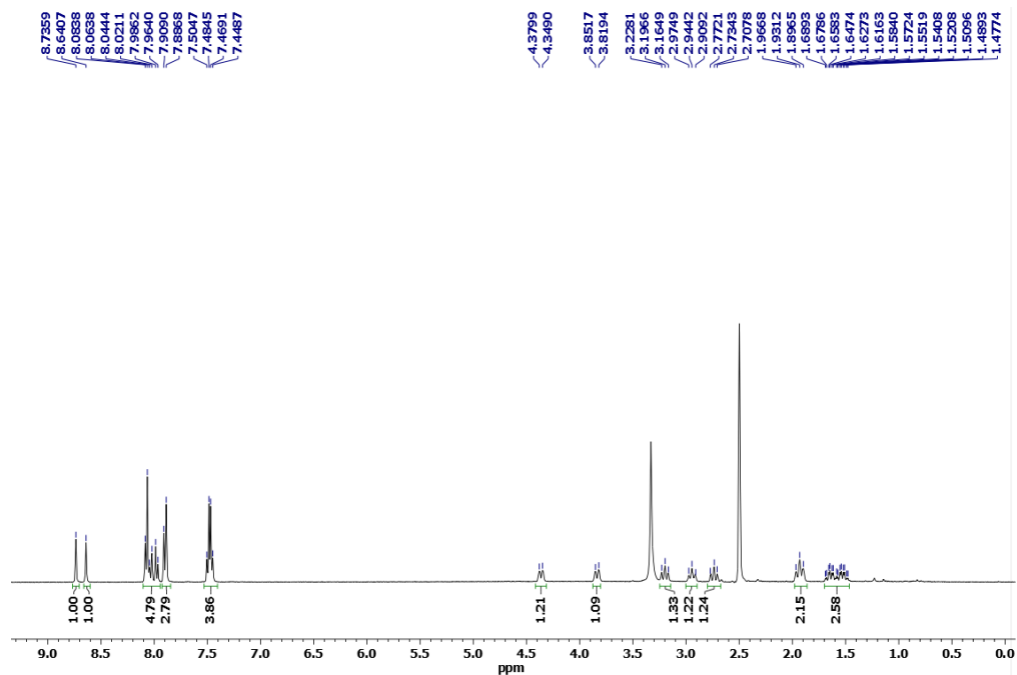HPLC purity 98% ( $R_t = 14.62$  min)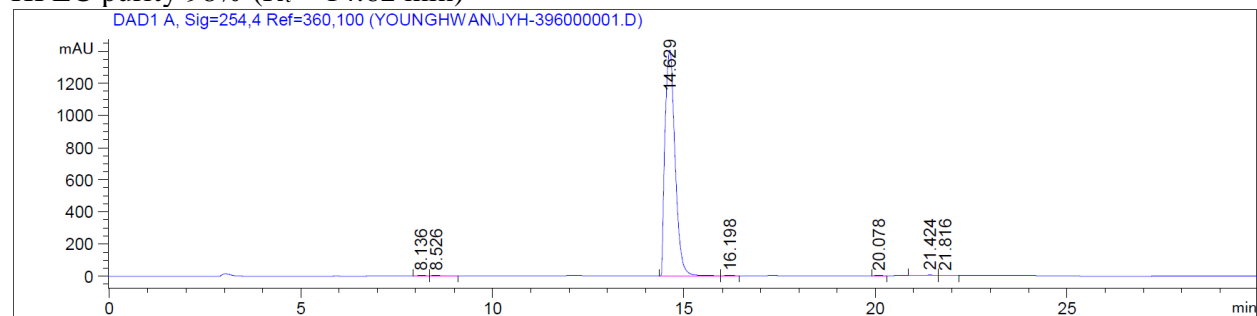

4-(4-(1-(2,2,2-Trifluoroacetyl)piperidin-4-yl)phenyl)-7-(4-(trifluoromethyl)phenyl)-2-naphthoic acid (**1d**).

### Elemental Composition Report

#### Single Mass Analysis

Tolerance = 5.0 mDa / DBE: min = -1.5, max = 100.0

Element prediction: Off

Number of isotope peaks used for i-FIT = 3

Monoisotopic Mass, Even Electron Ions

89 formula(e) evaluated with 1 results within limits (up to 50 closest results for each mass)

Elements Used:

C: 0-100 H: 0-250 N: 1-1 O: 0-50 F: 6-6

JYH-07JAN21-412-2-1-NEG 18 (0.321) AM2 (Ar,22000.0,0.00,0.00); ABS

TOF MS ES-

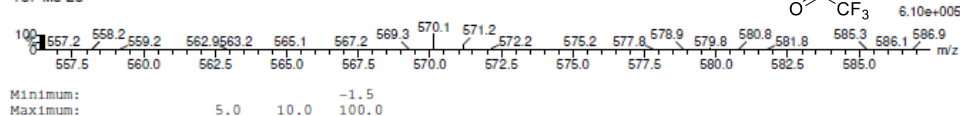

Minimum:

Maximum: 5.0 10.0 100.0

Mass Calc. Mass mDa PPM DBE 1-FIT Norm Conf (%) Formula

570.1493 570.1504 -1.1 -1.9 18.5 361.3 n/a n/a C31 H22 N O3 F6

8.7850 8.2589 8.1039 8.0996 8.0762 8.0542 7.8408 7.8201 7.8055 7.7762 7.7513 7.5022 7.3869 4.7918 4.7584 4.2326 4.1983 3.3571 3.3511 3.3237 3.3178 3.2909 3.2849 2.9833 2.9808 2.9713 2.9626 2.9331 2.9412 2.9586 2.9527 2.9058 2.1279 2.0945 1.8888 1.8789 1.8564 1.8465 1.8243 1.8144 1.7913

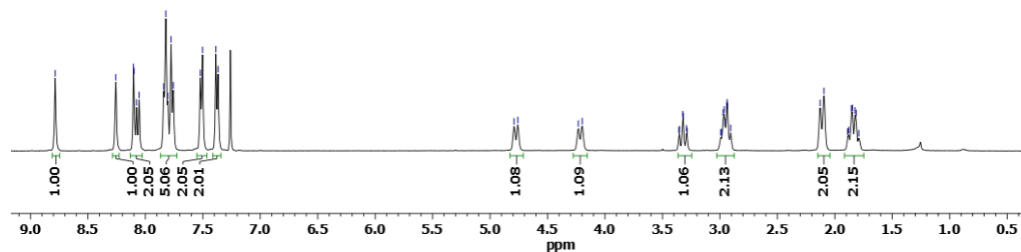

HPLC purity 99% ( $R_t$  = 16.92 min)

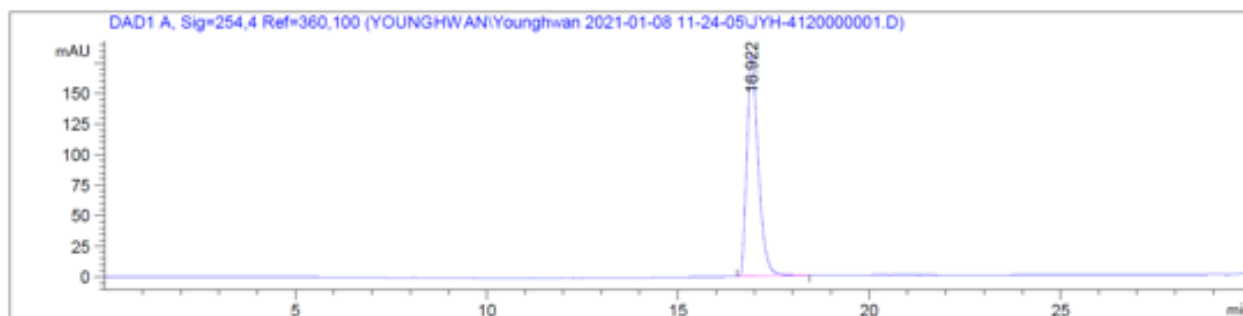

(4'-(Piperidin-4-yl)-5-(4-(4-(trifluoromethyl)phenyl)-1*H*-1,2,3-triazol-1-yl)-[1,1'-biphenyl]-3-yl)methyl dihydrogen phosphate (**3b**).

#### Elemental Composition Report

##### Single Mass Analysis

Tolerance = 5.0 mDa / DBE: min = -1.5, max = 100.0

Element prediction: Off

Number of isotope peaks used for i-FIT = 3

Monoisotopic Mass, Even Electron Ions

98 formula(e) evaluated with 1 results within limits (up to 50 closest results for each mass)

Elements Used:

C: 0-100 H: 0-250 N: 4-4 O: 0-60 F: 3-3 P: 1-1

JYH-19MAY20-354-HCL 169 (2.876) AM2 (Ar,25000.0,0.00,0.00); ABS

TOF MS ES+

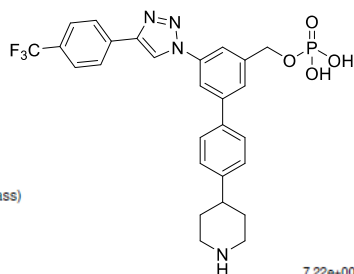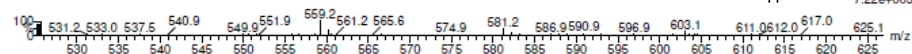

Minimum: 5.0 5.0 -1.5  
Maximum: 5.0 5.0 100.0

| Mass     | Calc. Mass | mDa  | PPM  | DBE  | 1-FIT | Norm | Conf(%) | Formula            |
|----------|------------|------|------|------|-------|------|---------|--------------------|
| 559.1716 | 559.1722   | -0.6 | -1.1 | 15.5 | 404.5 | n/a  | n/a     | C27 H27 N4 O4 F3 P |

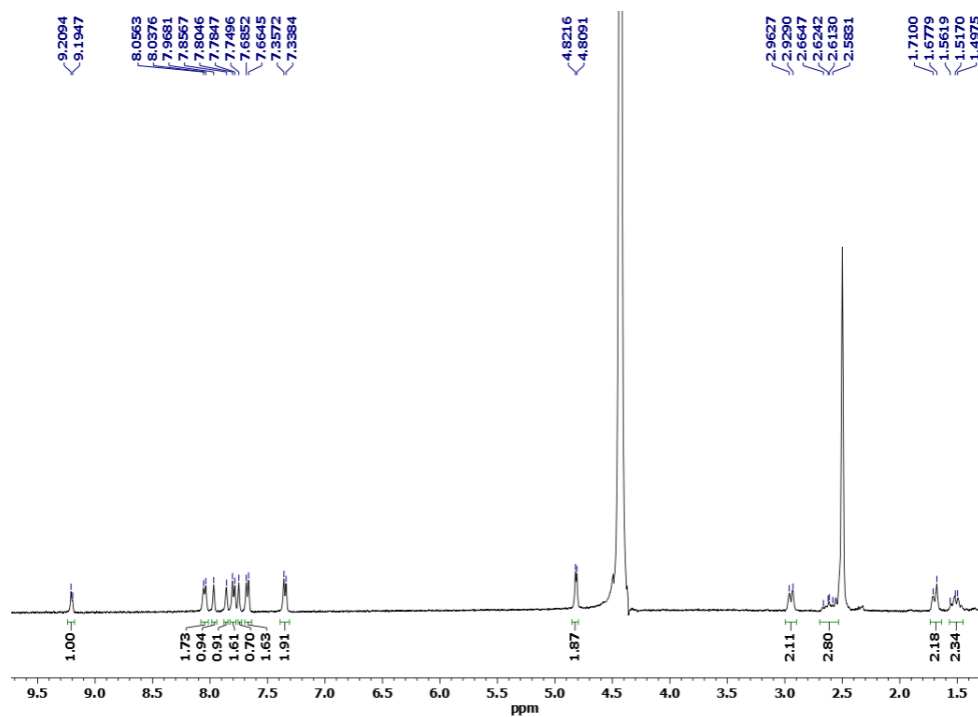

HPLC purity 96% ( $R_t = 8.58$  min)

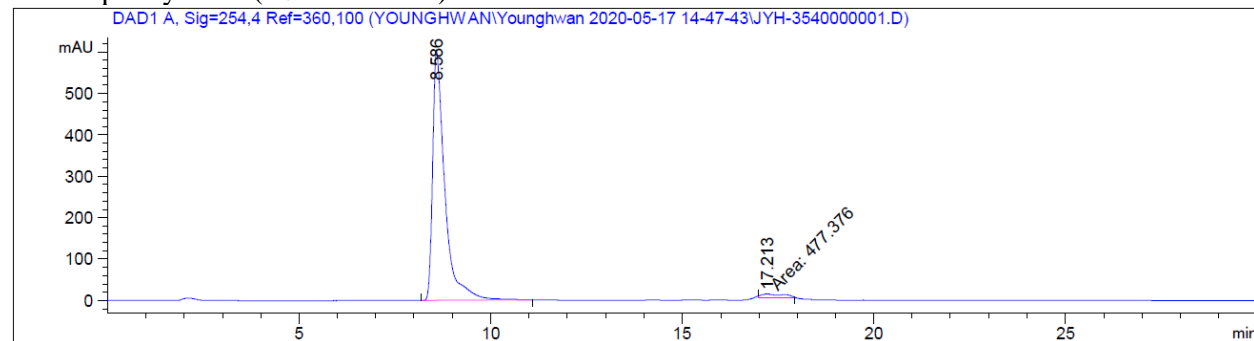

Amino-5-(4-(4-(trifluoromethyl)phenyl)-1*H*-1,2,3-triazol-1-yl)-[1,1'-biphenyl]-3-carboxylic acid (**7**).

#### Elemental Composition Report

##### Single Mass Analysis

Tolerance = 5.0 mDa / DBE: min = -1.5, max = 100.0

Element prediction: C<sub>22</sub>H<sub>16</sub>N<sub>4</sub>O<sub>2</sub>F<sub>3</sub>

Number of isotope peaks used for i-FIT = 3

Monoisotopic Mass, Even Electron Ions

60 formula(e) evaluated with 1 results within limits (up to 50 closest results for each mass)

Elements Used:

C: 0-100 H: 0-250 N: 4-4 O: 0-60 F: 3-3

JYH-07JUN19-237 194 (3.299) AM2 (Ar:25000.0,0.00,0.00); ABS

TOF MS ES+

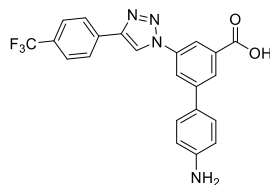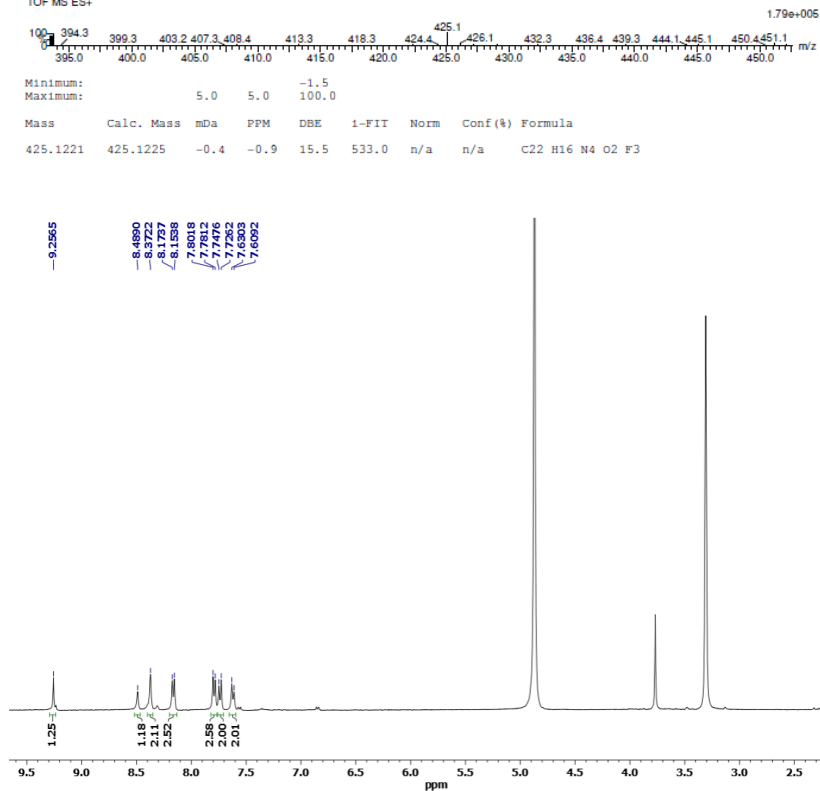

HPLC purity 97% ( $R_t = 8.96$  min)

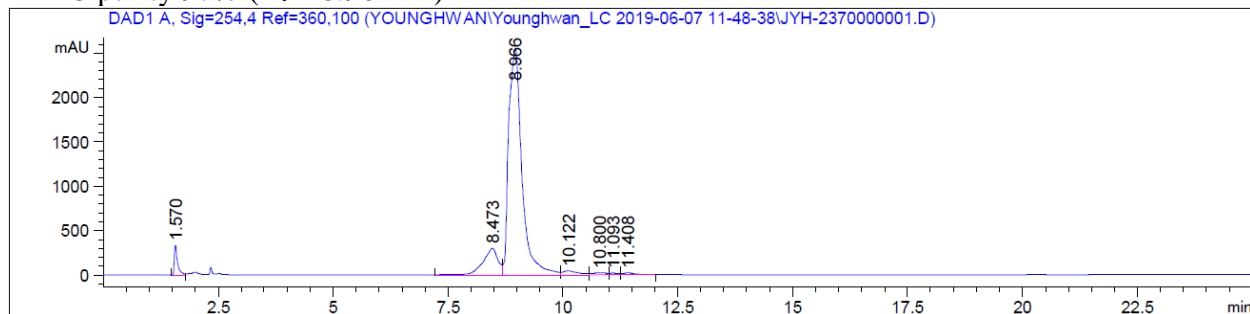

4'-Acetamido-5-(4-(4-(trifluoromethyl)phenyl)-1H-1,2,3-triazol-1-yl)-[1,1'-biphenyl]-3-carboxylic acid (**8**).

#### Elemental Composition Report

##### Single Mass Analysis

Tolerance = 5.0 mDa / DBE: min = -1.5, max = 100.0

Element prediction: Off

Number of isotope peaks used for i-FIT = 3

Monoisotopic Mass, Even Electron Ions

70 formulae evaluated with 1 results within limits (up to 50 closest results for each mass)

Elements Used:

C: 0-100 H: 0-250 N: 4-4 O: 0-60 F: 3-3

JYH-19JUN19-242 141 (2.402) AM2 (Ar25000.0.0.00.00); ABS

TOF MS ES+

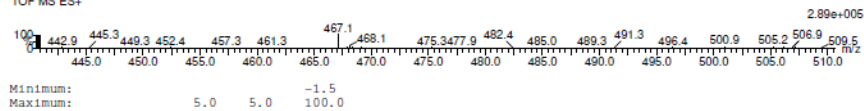

Minimum: -1.5  
Maximum: 5.0 5.0 100.0

| Mass     | Calc. Mass | mDa  | PPM  | DBE  | i-FIT | Norm | Conf(%) | Formula          |
|----------|------------|------|------|------|-------|------|---------|------------------|
| 467.1330 | 467.1331   | -0.1 | -0.2 | 16.5 | 432.4 | n/a  | n/a     | C24 H18 N4 O3 F3 |

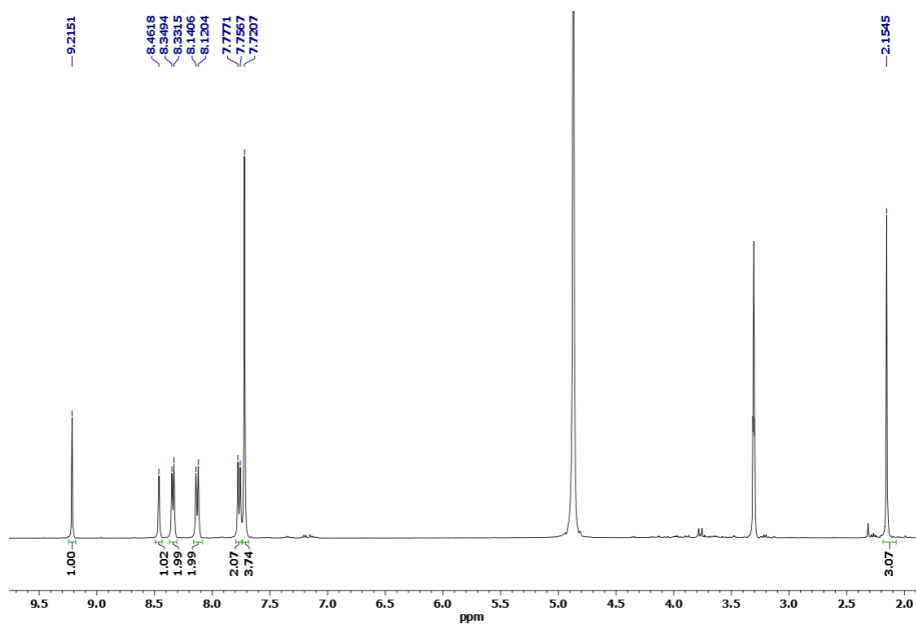

HPLC purity 99% ( $R_t = 7.95$  min)

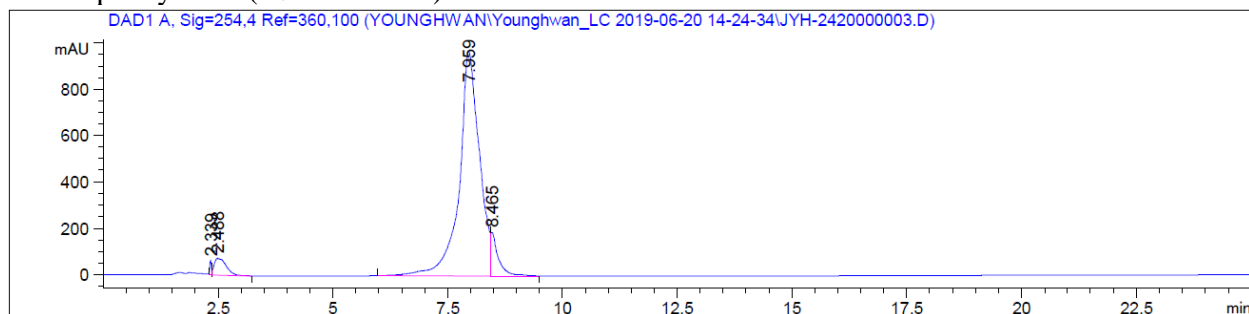

4'-Benzamido-5-(4-(4-(trifluoromethyl)phenyl)-1*H*-1,2,3-triazol-1-yl)-[1,1'-biphenyl]-3-carboxylic acid (**9**).

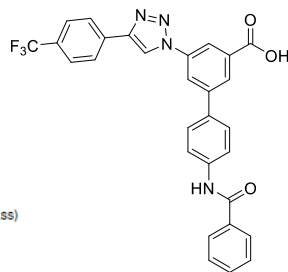

#### Elemental Composition Report

##### Single Mass Analysis

Tolerance = 5.0 mDa / DBE: min = -1.5, max = 100.0

Element prediction: Off

Number of isotope peaks used for i-FIT = 3

Monoisotopic Mass, Even Electron Ions

96 formula(e) evaluated with 2 results within limits (up to 50 closest results for each mass)

Elements Used:

C: 0-100 H: 0-250 N: 4-4 O: 0-60 F: 3-3

JYH-27JUN19-244-HPLC 152 (2.588) AM2 (Ar:25000.0,0.00,0.00); ABS

TOF MS ES+

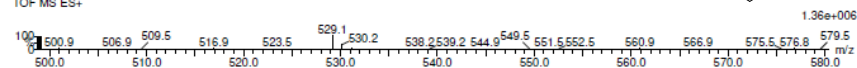

Minimum:

Maximum:

| Mass     | Calc. Mass | mDa | PPM | DBE  | 1-FIT | Norm  | Conf(%) | Formula           |
|----------|------------|-----|-----|------|-------|-------|---------|-------------------|
| 529.1489 | 529.1488   | 0.1 | 0.2 | 20.5 | 408.2 | 0.000 | 99.98   | C29 H20 N4 O3 F3  |
|          | 529.1452   | 3.7 | 7.0 | -1.5 | 416.5 | 8.327 | 0.02    | C11 H28 N4 O16 F3 |

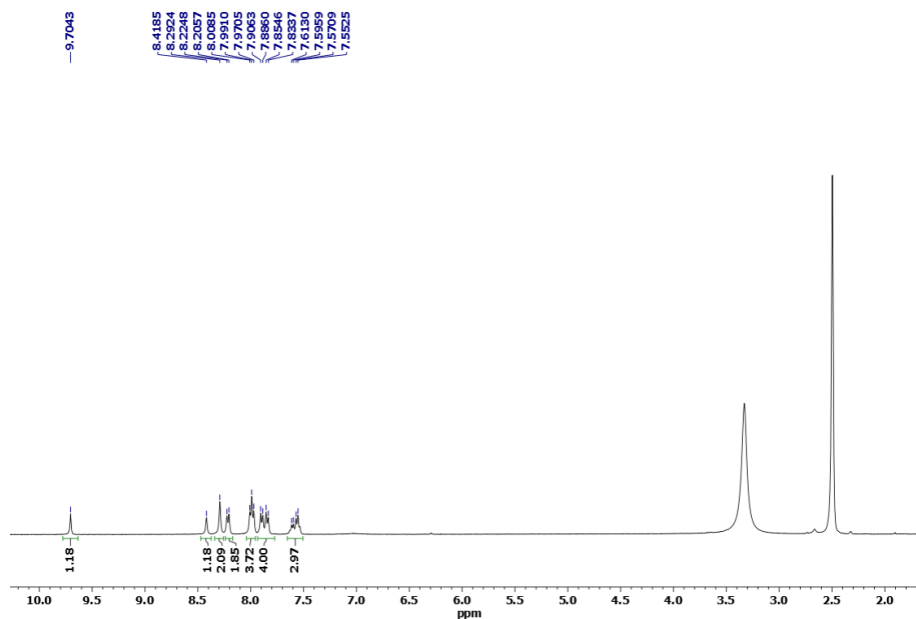

HPLC purity 99% ( $R_t = 9.48$  min)

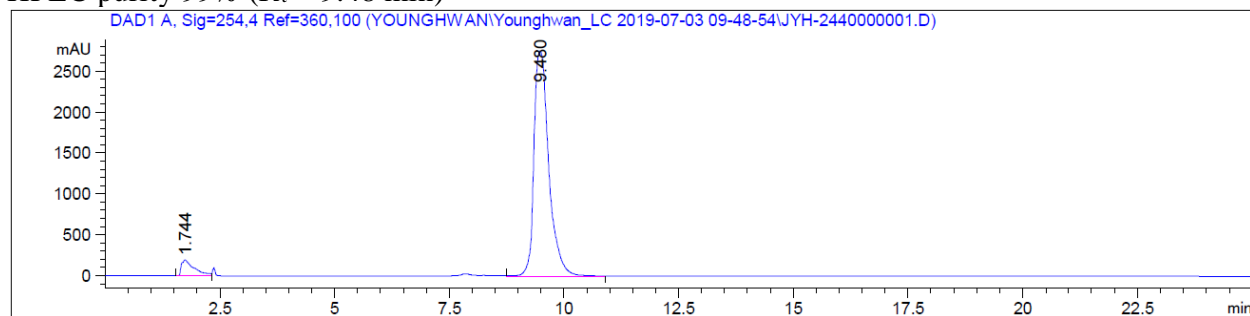

4'-((*tert*-Butoxycarbonyl)amino)-5-(4-(4-(trifluoromethyl)phenyl)-1*H*-1,2,3-triazol-1-yl)-[1,1'-biphenyl]-3-carboxylic acid (**10**).

#### Elemental Composition Report

##### Single Mass Analysis

Tolerance = 5.0 mDa / DBE: min = -1.5, max = 100.0

Element prediction: Off

Number of isotope peaks used for i-FIT = 3

Monoisotopic Mass, Even Electron Ions

94 formula(e) evaluated with 1 results within limits (up to 50 closest results for each mass)

Elements Used:

C: 0-100 H: 0-250 N: 4-4 O: 0-60 F: 3-3

JYH-31MAY19-234 279 (4.737) AM2 (Ar,25000.0,0.00,0.00); ABS

TOF MS ES+

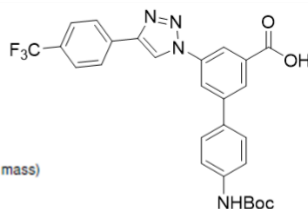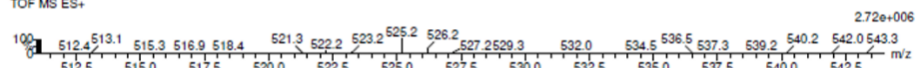

Minimum: -1.5  
Maximum: 5.0 5.0 100.0

| Mass     | Calc. Mass | mDa | PPM | DBE  | 1-FIT | Norm | Conf(%) | Formula          |
|----------|------------|-----|-----|------|-------|------|---------|------------------|
| 525.1755 | 525.1750   | 0.5 | 1.0 | 16.5 | 484.3 | n/a  | n/a     | C27 H24 N4 O4 F3 |

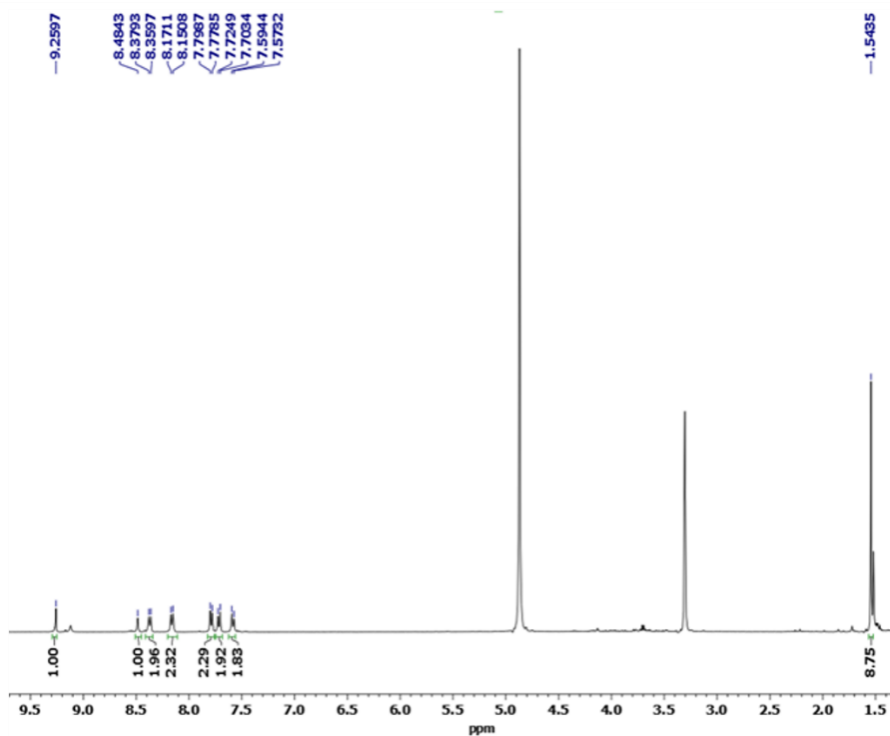

HPLC purity 99% ( $R_t = 10.36$  min)

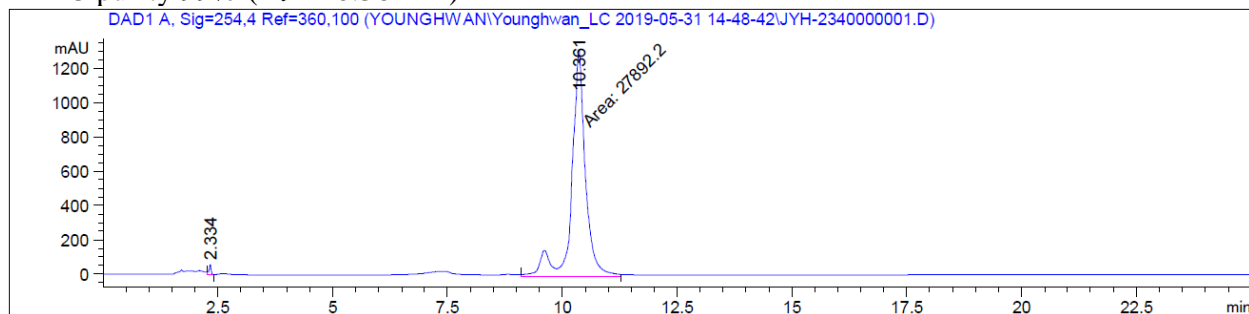

4'-(Piperidine-4-carboxamido)-5-(4-(4-(trifluoromethyl)phenyl)-1*H*-1,2,3-triazol-1-yl)-[1,1'-biphenyl]-3-carboxylic acid (**11**).

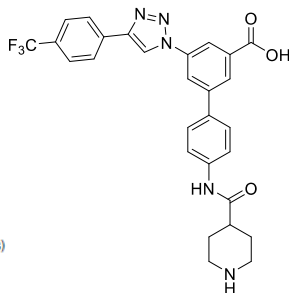

#### Elemental Composition Report

##### Single Mass Analysis

Tolerance = 5.0 mDa / DBE: min = -1.5, max = 100.0

Element prediction: Off

Number of isotope peaks used for i-FIT = 3

Monoisotopic Mass, Even Electron Ions

93 formula(e) evaluated with 1 results within limits (up to 50 closest results for each mass)

Elements Used:

C: 0-100 H: 0-250 N: 5-5 O: 0-60 F: 3-3

JYH-15AUG19-DIL-014 114 (1.945) AM2 (Ar:25000.0,0.00,0.00); ABS

TOF MS ES+

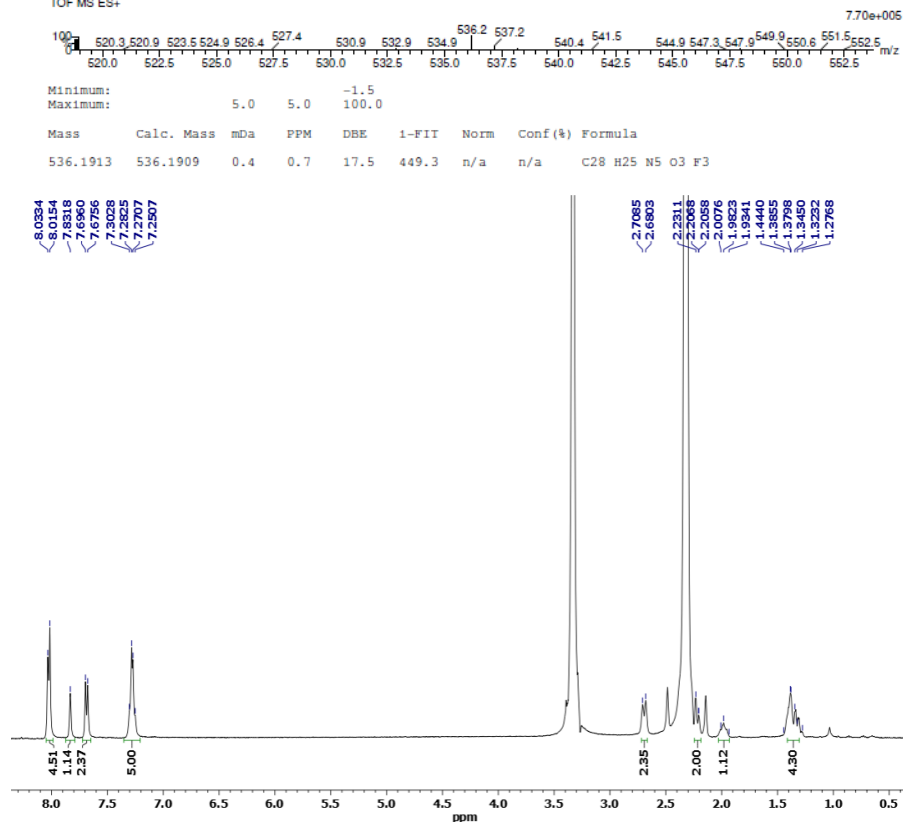

HPLC purity 99% ( $R_t = 21.20$  min)

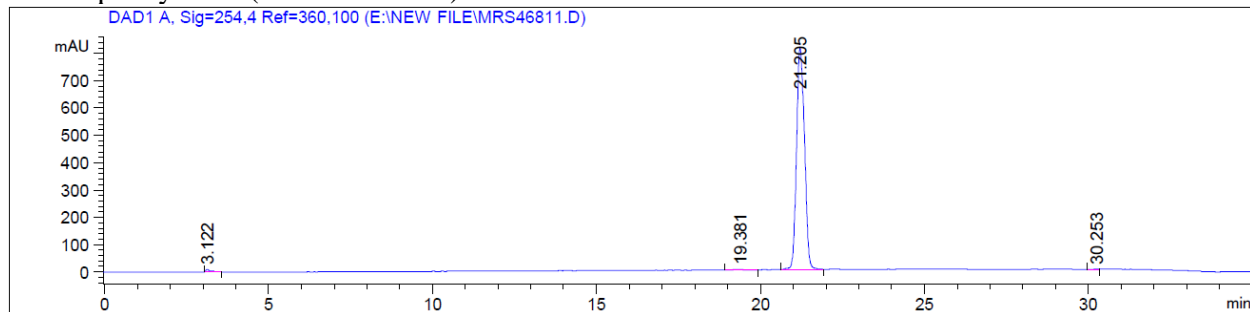

4'-(1-(*tert*-Butoxycarbonyl)piperidine-4-carboxamido)-5-(4-(4-(trifluoromethyl)phenyl)-1*H*-1,2,3-triazol-1-yl)-[1,1'-biphenyl]-3-carboxylic acid (**12**).

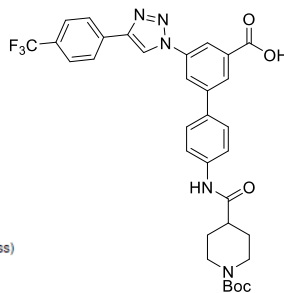

#### Elemental Composition Report

##### Single Mass Analysis

Tolerance = 5.0 mDa / DBE: min = -1.5, max = 100.0

Element prediction: Off

Number of isotope peaks used for i-FIT = 3

Monoisotopic Mass, Even Electron Ions

134 formula(e) evaluated with 1 results within limits (up to 50 closest results for each mass)

Elements Used:

C: 0-100 H: 0-250 N: 5-5 O: 0-60 F: 3-3 Na: 1-1

JYH-13AUG19-DIL-012 129 (2.199) AM2 (Ar,25000.0,0.00,0.00); ABS

TOF MS ES+

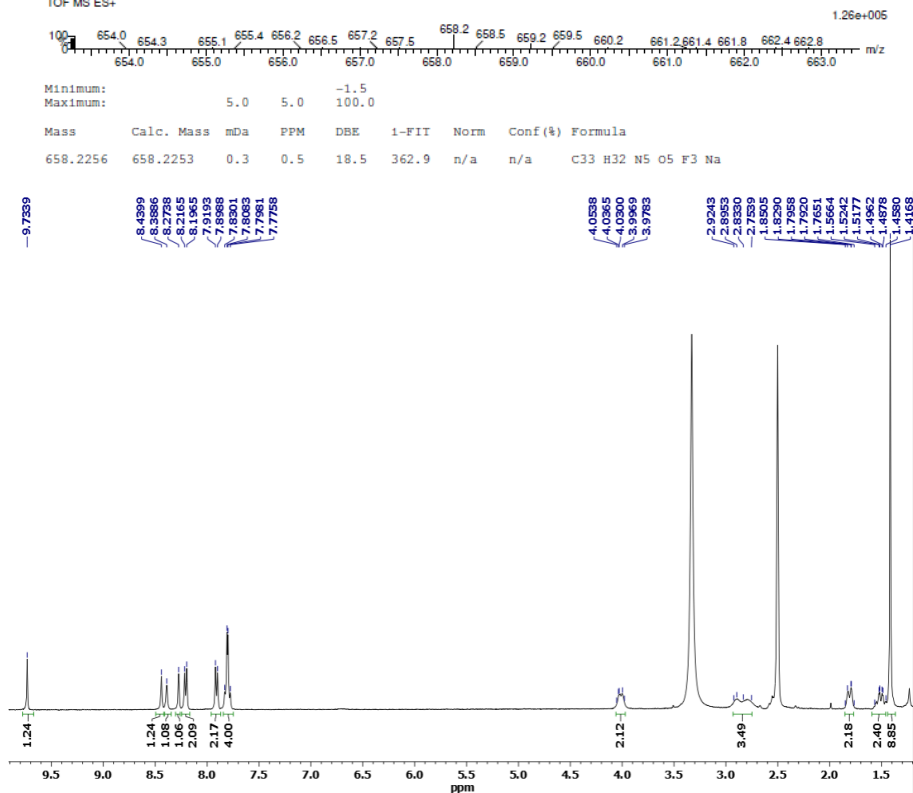

HPLC purity 98% ( $R_t = 24.10$  min)

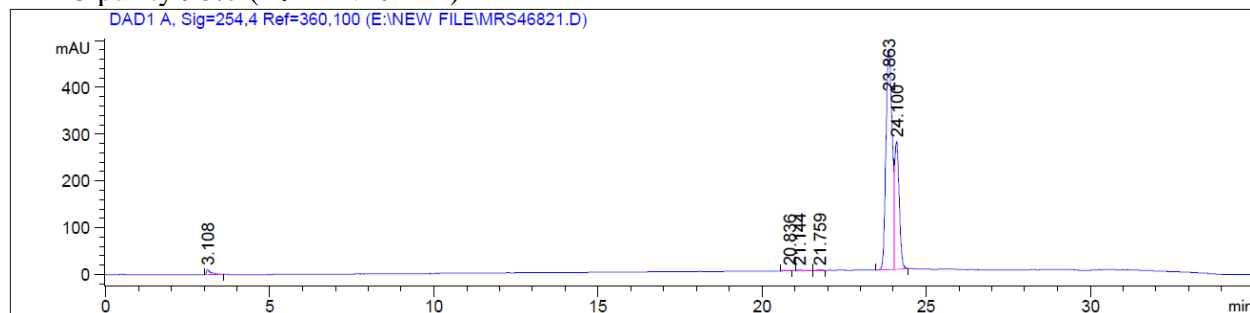

5-(4-(4-(Trifluoromethyl)phenyl)-1*H*-1,2,3-triazol-1-yl)-[1,1'-biphenyl]-3,4'-dicarboxylic acid (**13**)

#### Elemental Composition Report

##### Single Mass Analysis

Tolerance = 5.0 mDa / DBE: min = -1.5, max = 100.0

Element prediction: Off

Number of isotope peaks used for i-FIT = 3

Monoisotopic Mass, Even Electron Ions

74 formula(e) evaluated with 1 results within limits (up to 50 closest results for each mass)

Elements Used:

C: 0-100 H: 0-250 N: 3-3 O: 0-60 F: 3-3

JYH-31JUL19-256 146 (2.486) AM2 (Ar.25000.0,0.00,0.00); ABS

TOF MS ES+

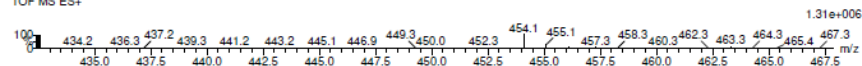

Minimum: -1.5  
Maximum: 5.0 5.0 100.0

| Mass     | Calc. Mass | mDa | PPM | DBE  | 1-FIT | Norm | Conf(%) | Formula          |
|----------|------------|-----|-----|------|-------|------|---------|------------------|
| 454.1017 | 454.1015   | 0.2 | 0.4 | 16.5 | 439.7 | n/a  | n/a     | C23 H15 N3 O4 F3 |

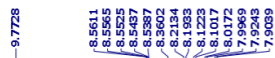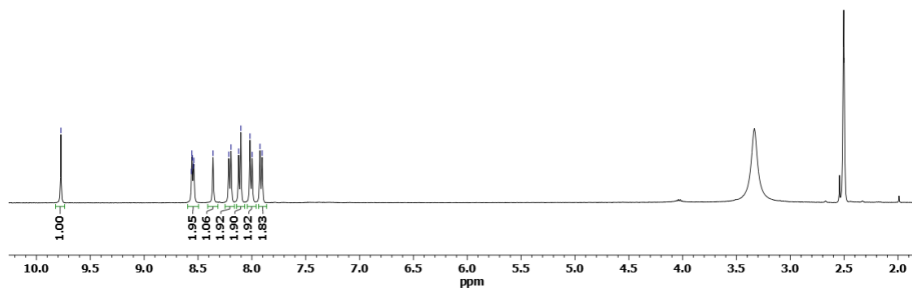

HPLC purity 99% ( $R_t = 13.46$  min)

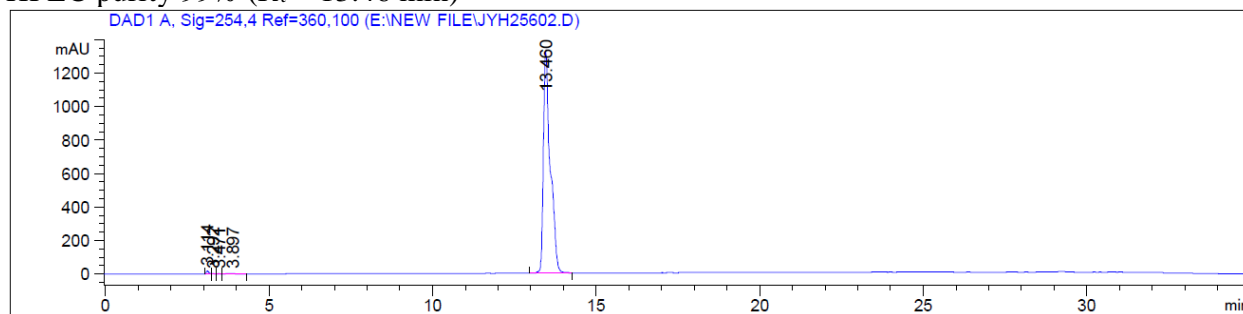

4'-((3-Aminopropyl)carbamoyl)-5-(4-(4-(trifluoromethyl)phenyl)-1*H*-1,2,3-triazol-1-yl)-[1,1'-biphenyl]-3-carboxylic acid (**14**)

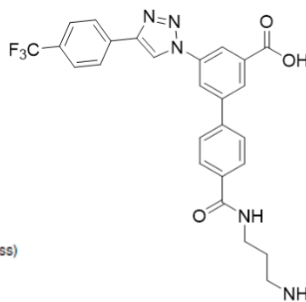

#### Elemental Composition Report

##### Single Mass Analysis

Tolerance = 5.0 mDa / DBE: min = -1.5, max = 100.0

Element prediction: Off

Number of isotope peaks used for i-FIT = 3

Monoisotopic Mass, Even Electron Ions

86 formula(e) evaluated with 1 results within limits (up to 50 closest results for each mass)

Elements Used:

C: 0-100 H: 0-250 N: 5-5 O: 0-60 F: 3-3

JYH-26JUL19-255-2 146 (2.487) AM2 (Ar.25000.0,0.00,0.00); ABS

TOF MS ES+

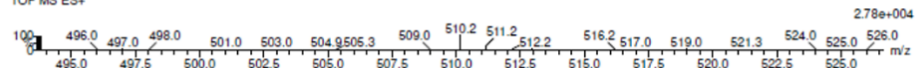

Minimum: -1.5  
Maximum: 100.0

| Mass     | Calc. Mass | mDa | PPM | DBE  | 1-FIT | Norm | Conf(%) | Formula                                                                      |
|----------|------------|-----|-----|------|-------|------|---------|------------------------------------------------------------------------------|
| 510.1754 | 510.1753   | 0.1 | 0.2 | 16.5 | 257.6 | n/a  | n/a     | C <sub>26</sub> H <sub>23</sub> N <sub>5</sub> O <sub>3</sub> F <sub>3</sub> |

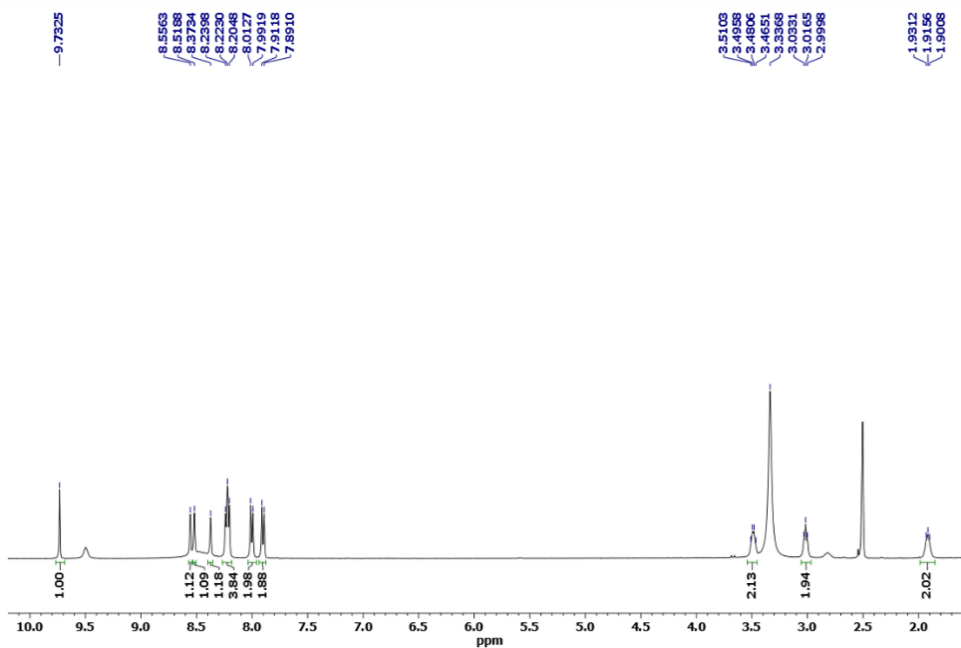

4'-Bromo-5-(4-(4-(trifluoromethyl)phenyl)-1*H*-1,2,3-triazol-1-yl)-[1,1'-biphenyl]-3-carboxylic acid (**15**)

#### Elemental Composition Report

##### Single Mass Analysis

Tolerance = 5.0 mDa / DBE: min = -1.5, max = 100.0

Element prediction: Off

Number of isotope peaks used for i-FIT = 3

Monoisotopic Mass, Even Electron Ions

53 formula(e) evaluated with 1 results within limits (up to 50 closest results for each mass)

Elements Used:

C: 0-100 H: 0-250 N: 3-3 O: 0-60 F: 3-3 79Br: 1-1

JYH-08OCT19-284-HPLC 205 (3.485) AM2 (Ar.25000.0.0.0.0.0); ABS

TOF MS ES+

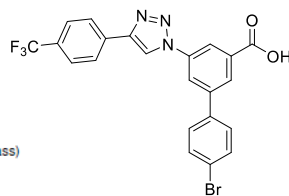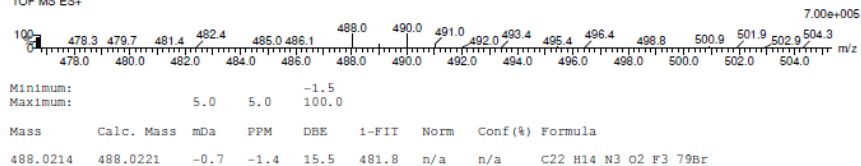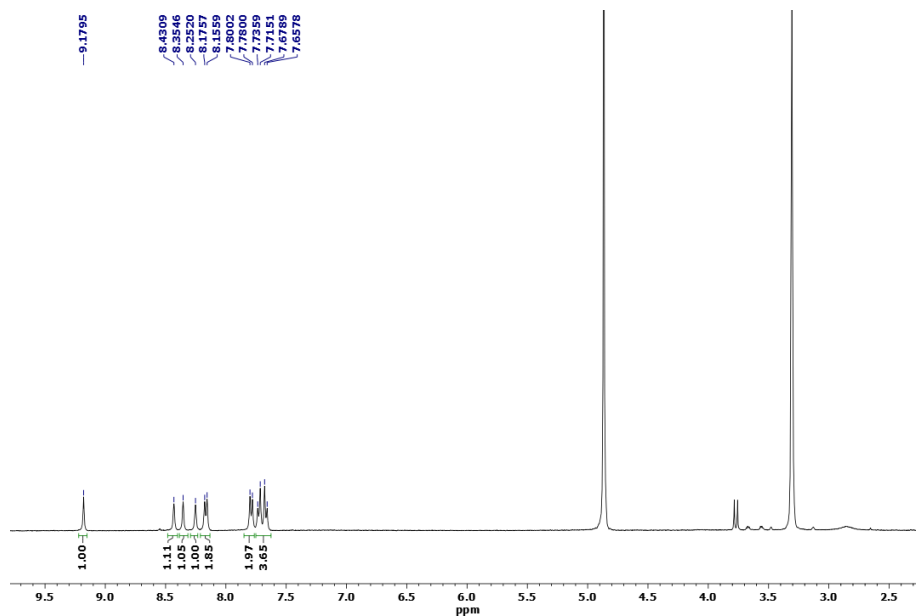

HPLC purity 99% ( $R_t = 12.93$  min)

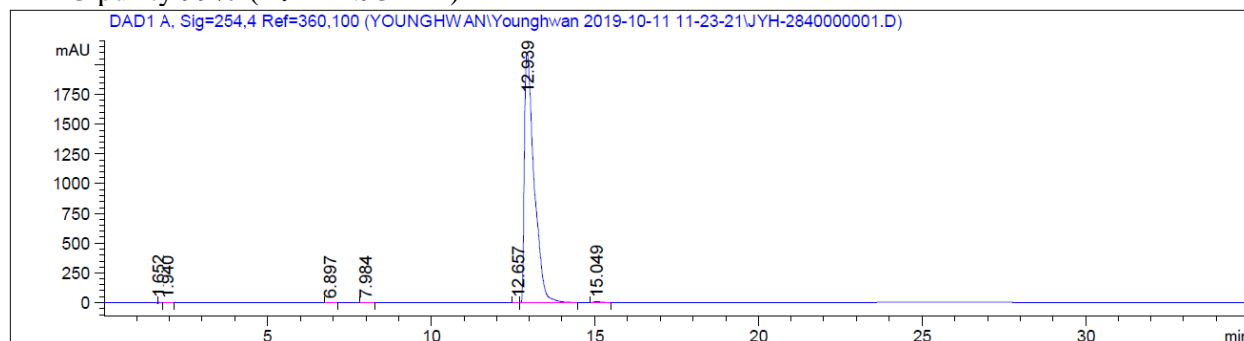

4'-(2-Amino-2-oxoethyl)-5-(4-(4-(trifluoromethyl)phenyl)-1*H*-1,2,3-triazol-1-yl)-[1,1'-biphenyl]-3-carboxylic acid (**16**).

#### Elemental Composition Report

##### Single Mass Analysis

Tolerance = 5.0 mDa / DBE: min = -1.5, max = 100.0

Element prediction: Off

Number of isotope peaks used for i-FIT = 3

Monoisotopic Mass, Even Electron Ions

70 formula(e) evaluated with 1 results within limits (up to 50 closest results for each mass)

Elements Used:

C: 0-150 H: 0-200 N: 4-4 O: 0-60 F: 3-3

JYH-09NOV18-143 100 (1.708) AM2 (Ar.250000.0.0.00.0.00); ABS

TOF MS ES+

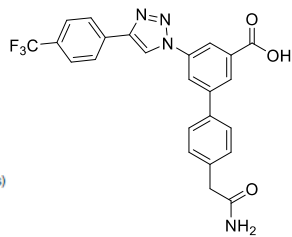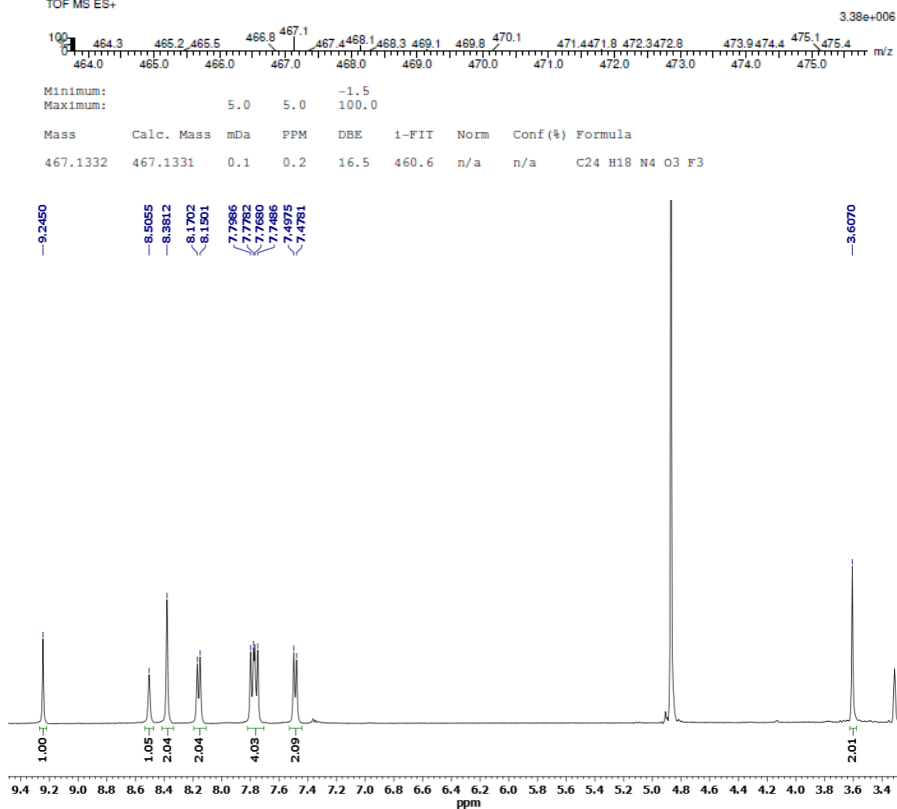

HPLC purity 99% ( $R_t = 8.55$  min)

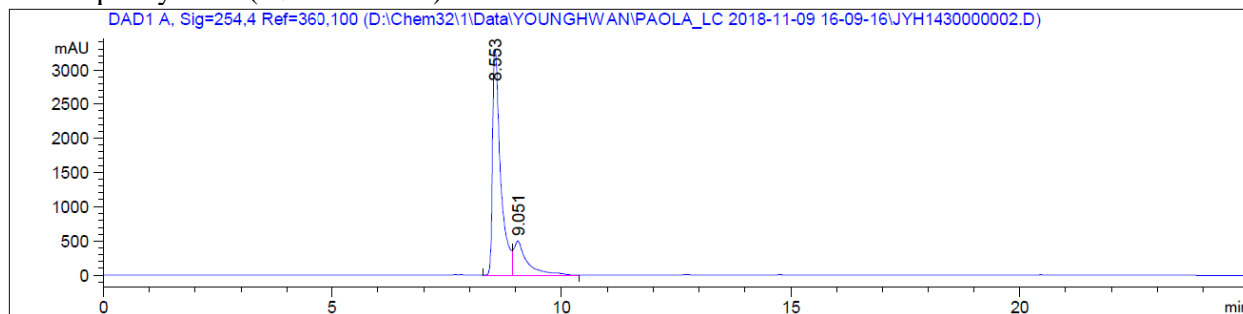

4'-(2-Cyanoethyl)-5-(4-(4-(trifluoromethyl)phenyl)-1*H*-1,2,3-triazol-1-yl)-[1,1'-biphenyl]-3-carboxylic acid (**17**).

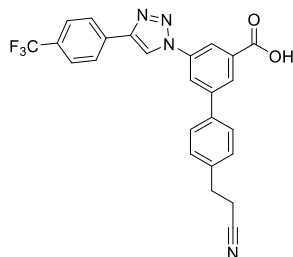

#### Elemental Composition Report

##### Single Mass Analysis

Tolerance = 5.0 PPM / DBE: min = -1.5, max = 100.0

Element prediction: Off

Number of isotope peaks used for i-FIT = 3

Monoisotopic Mass, Even Electron Ions

68 formula(e) evaluated with 1 results within limits (up to 50 closest results for each mass)

Elements Used:

C: 0-100 H: 0-200 N: 4-4 O: 0-40 F: 3-3

JYH-30AUG19-107-2-1 89 (1.522) AM2 (Ar:42000.0,0.00,0.00); ABS

TOF MS ES+

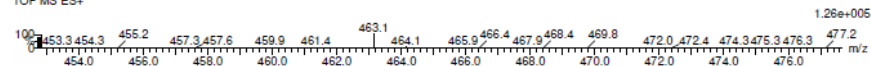

Minimum: -1.5  
Maximum: 100.0

| Mass     | Calc. Mass | mDa  | PPM  | DBE  | 1-FIT | Norm | Conf(%) | Formula                                                                      |
|----------|------------|------|------|------|-------|------|---------|------------------------------------------------------------------------------|
| 463.1381 | 463.1382   | -0.1 | -0.2 | 17.5 | 41.9  | n/a  | n/a     | C <sub>25</sub> H <sub>18</sub> N <sub>4</sub> O <sub>2</sub> F <sub>3</sub> |

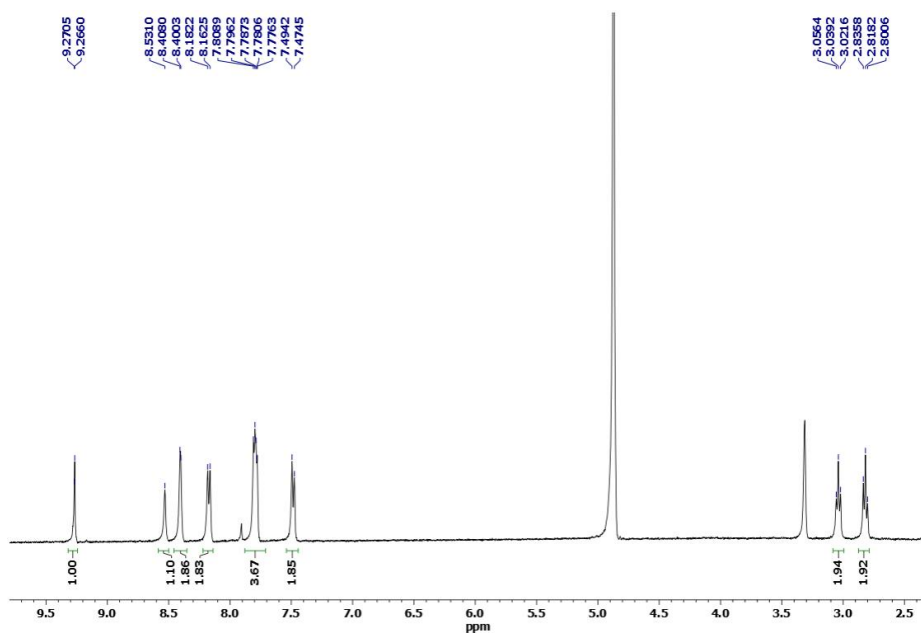

HPLC purity 99% ( $R_t = 7.63$  min)

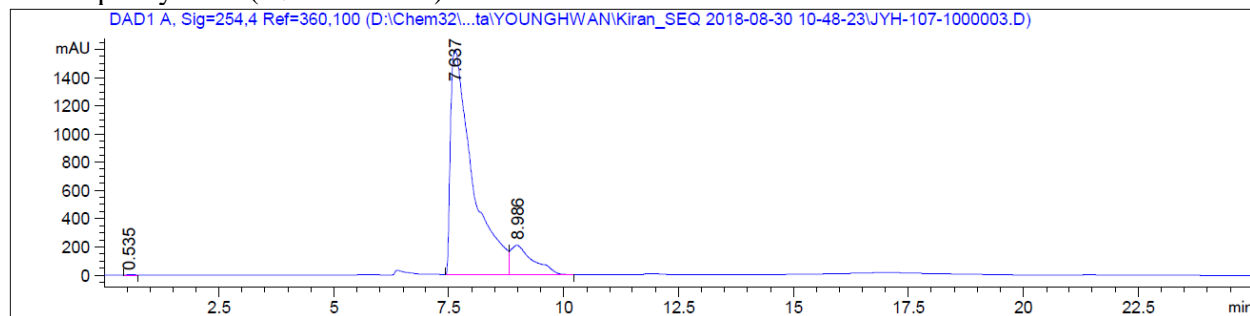

4'-(3-Aminopropyl)-5-(4-(4-(trifluoromethyl)phenyl)-1*H*-1,2,3-triazol-1-yl)-[1,1'-biphenyl]-3-carboxylic acid (**18**).

#### Elemental Composition Report

##### Single Mass Analysis

Tolerance = 10.0 mDa / DBE: min = -1.5, max = 100.0  
 Element prediction: Off  
 Number of isotope peaks used for i-FIT = 3

Monoisotopic Mass, Even Electron Ions  
 70 formula(e) evaluated with 3 results within limits (up to 50 closest results for each mass)  
 Elements Used:  
 C: 0-100 H: 0-250 N: 4-4 O: 0-60 F: 3-3

JYH-14MAY19-222 251 (4.263) AM2 (Ar:25000.0,0.00,0.00); ABS  
 TOF MS ES+

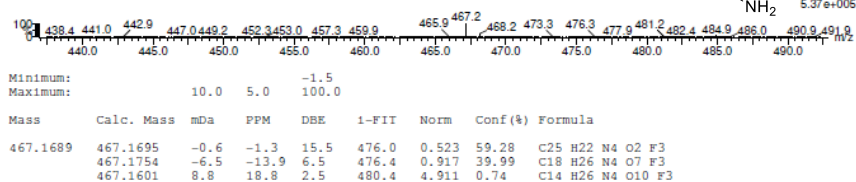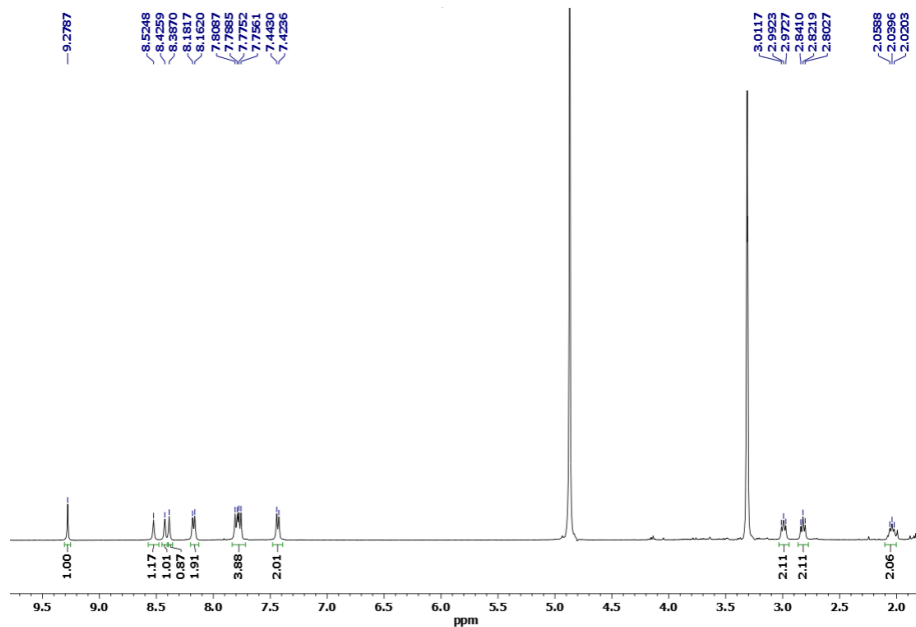

HPLC purity 98% ( $R_t = 8.14$  min)

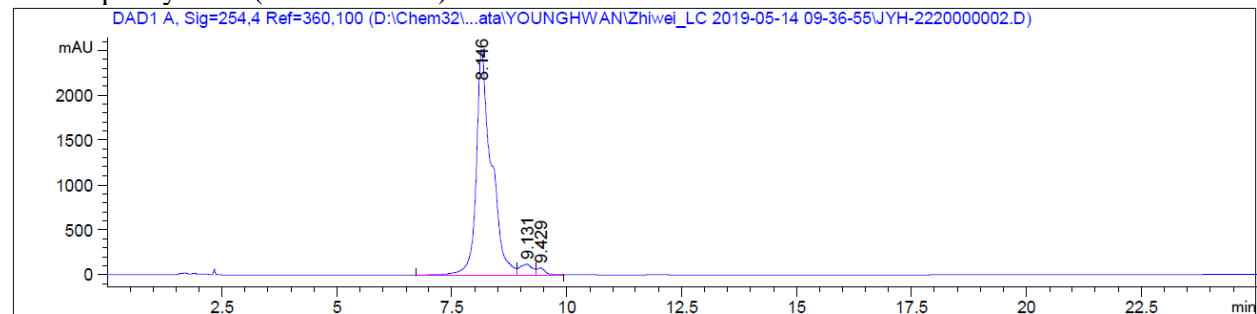

4'-(3-Aminoprop-1-yn-1-yl)-5-(4-(4-(trifluoromethyl)phenyl)-1*H*-1,2,3-triazol-1-yl)-[1,1'-biphenyl]-3-carboxylic acid (**19**)

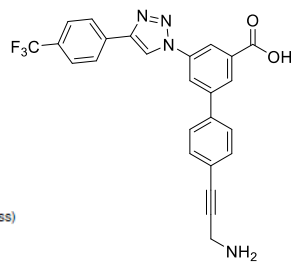

#### Elemental Composition Report

##### Single Mass Analysis

Tolerance = 5.0 mDa / DBE: min = -1.5, max = 100.0

Element prediction: Off

Number of isotope peaks used for i-FIT = 3

Monoisotopic Mass, Even Electron Ions

68 formula(e) evaluated with 1 results within limits (up to 50 closest results for each mass)

Elements Used:

C: 0-100 H: 0-250 N: 4-4 O: 0-60 F: 3-3

JYH-28OCT19-290-HPLC-2 143 (2.436) AM2 (Ar,25000.0,0.00,0.00); ABS

TOF MS ES+

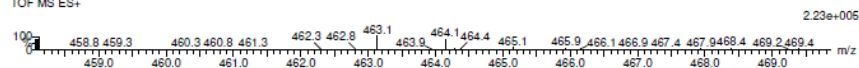

Minimum: -1.5  
Maximum: 5.0 5.0 100.0

| Mass     | Calc. Mass | mDa  | PPM  | DBE  | 1-FIT | Norm | Conf(%) | Formula          |
|----------|------------|------|------|------|-------|------|---------|------------------|
| 463.1380 | 463.1382   | -0.2 | -0.4 | 17.5 | 486.8 | n/a  | n/a     | C25 H18 N4 O2 F3 |

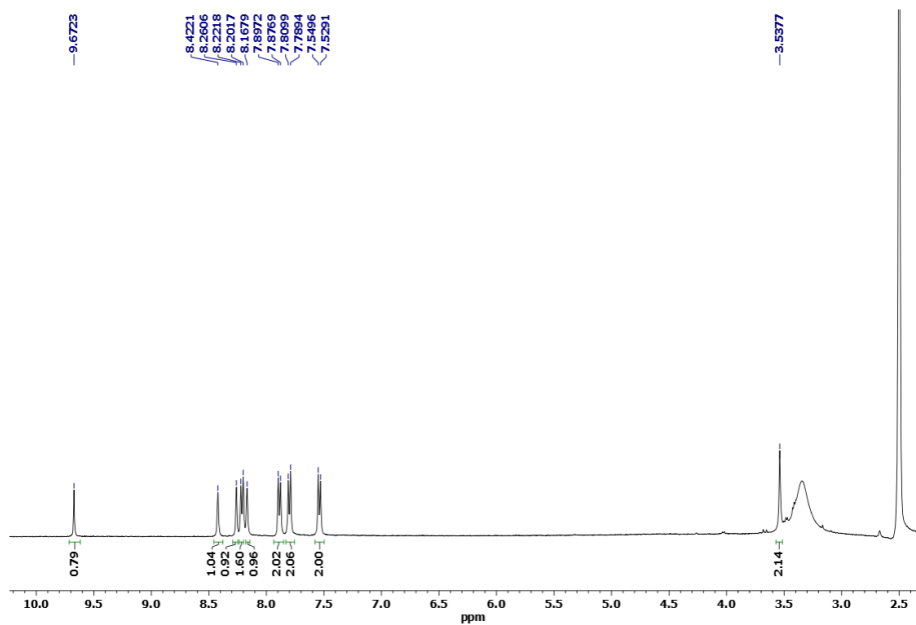

HPLC purity 97% ( $R_t = 10.49$  min)

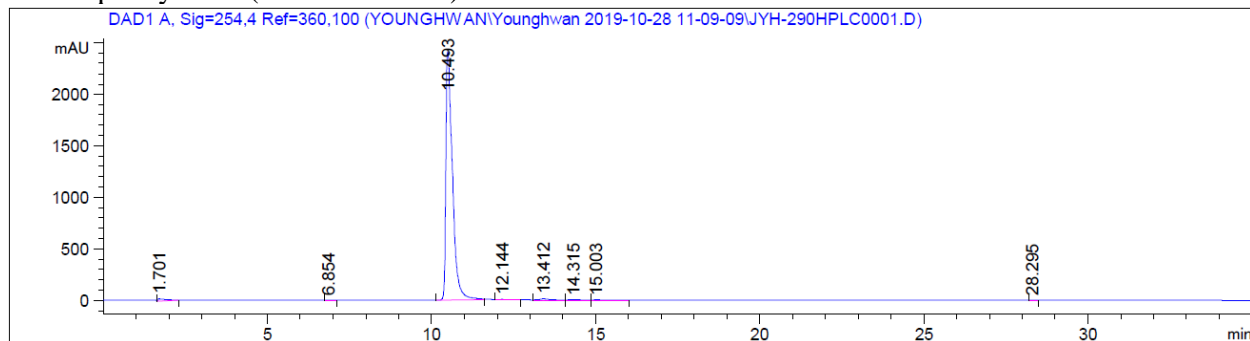

4'-((*tert*-Butoxycarbonyl)amino)propyl)-5-(4-(4-(trifluoromethyl)phenyl)-1*H*-1,2,3-triazol-1-yl)-[1,1'-biphenyl]-3-carboxylic acid (**20**).

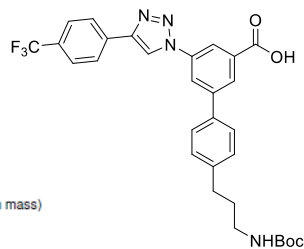

#### Elemental Composition Report

##### Single Mass Analysis

Tolerance = 5.0 mDa / DBE: min = -1.5, max = 100.0

Element prediction: Off

Number of isotope peaks used for i-FIT = 3

Monoisotopic Mass, Even Electron Ions

106 formula(e) evaluated with 1 results within limits (up to 50 closest results for each mass)

Elements Used:

C: 0-100 H: 0-250 N: 4-4 O: 0-60 F: 3-3 Na: 1-1

JYH-09MAY19-219 213 (3.620) AM2 (Ar,250000.0,0.00,0.00); ABS

TOF MS ES+

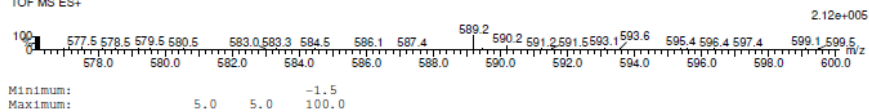

Minimum: -1.5  
Maximum: 5.0 5.0 100.0

| Mass     | Calc. Mass | mDa | PPM | DBE  | 1-FIT | Norm | Conf (%) | Formula             |
|----------|------------|-----|-----|------|-------|------|----------|---------------------|
| 589.2043 | 589.2039   | 0.4 | 0.7 | 16.5 | 408.2 | n/a  | n/a      | C30 H29 N4 O4 F3 Na |

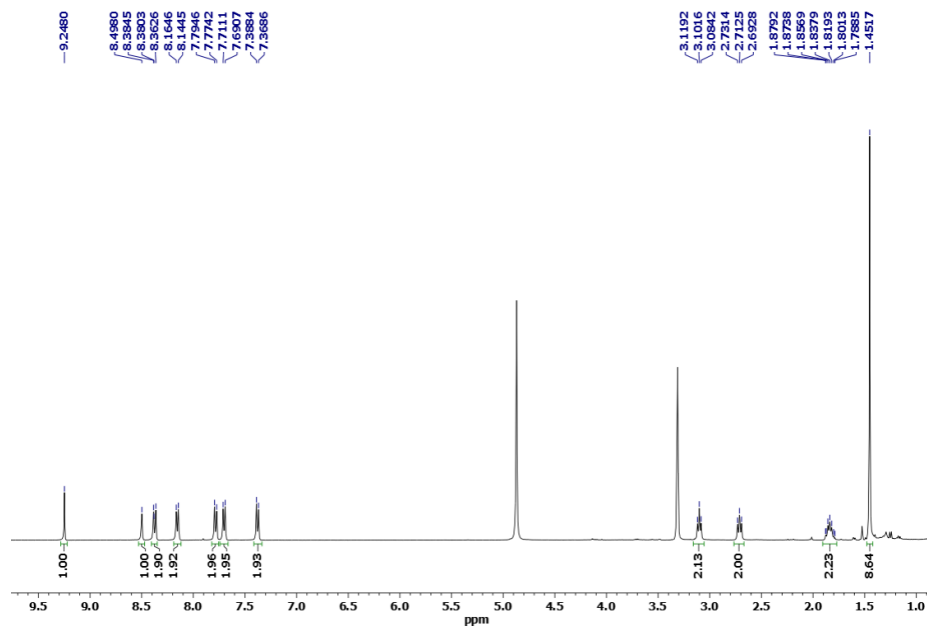

HPLC purity 99% ( $R_t = 10.56$  min)

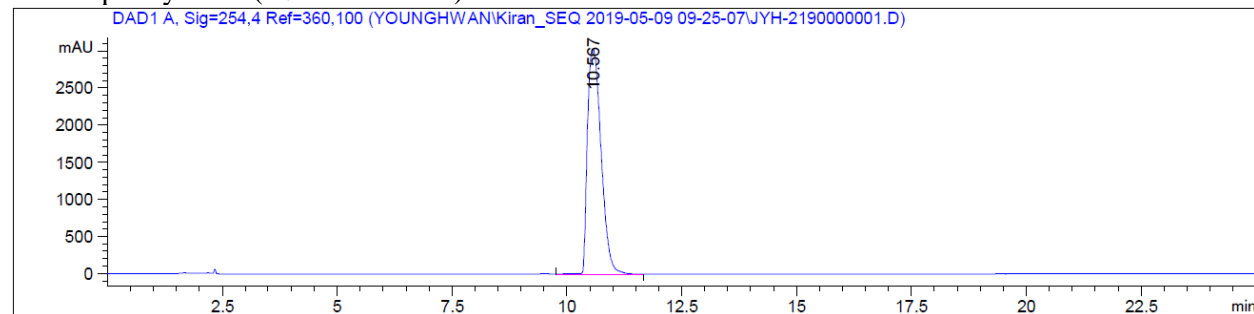

4'-(4-Hydroxybutyl)-5-(4-(4-(trifluoromethyl)phenyl)-1H-1,2,3-triazol-1-yl)-[1,1'-biphenyl]-3-carboxylic acid (**21**).

#### Elemental Composition Report

##### Single Mass Analysis

Tolerance = 20.0 mDa / DBE: min = -1.5, max = 100.0

Element prediction: Off

Number of isotope peaks used for i-FIT = 3

Monoisotopic Mass, Even Electron Ions

83 formula(e) evaluated with 5 results within limits (up to 50 closest results for each mass)

Elements Used:

C: 0-125 H: 0-200 N: 3-3 O: 0-30 F: 3-3

JYH-07OCT18-119 379 (6.428) AM2 (Ar,25000.0,0.00,0.00); ABS

TOF MS ES+

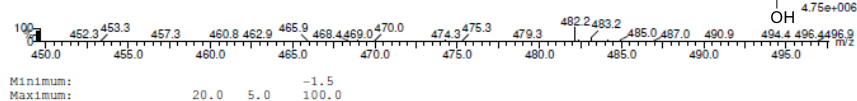

Minimum: -1.5  
Maximum: 20.0 5.0 100.0

| Mass     | Calc. Mass | mDa   | PPM   | DBE  | 1-FIT | Norm  | Conf(%) | Formula           |
|----------|------------|-------|-------|------|-------|-------|---------|-------------------|
| 482.1694 | 482.1692   | 0.2   | 0.4   | 15.5 | 491.6 | 0.154 | 85.69   | C26 H23 N3 O3 F3  |
|          | 482.1750   | -5.6  | -11.6 | 6.5  | 495.4 | 3.945 | 1.93    | C19 H27 N3 O8 F3  |
|          | 482.1598   | 9.6   | 19.9  | 2.5  | 499.3 | 7.810 | 0.04    | C15 H27 N3 O11 F3 |
|          | 482.1844   | -15.0 | -31.1 | 19.5 | 497.6 | 6.141 | 0.22    | C30 H23 N3 F3     |
|          | 482.1539   | 15.5  | 32.1  | 11.5 | 493.6 | 2.111 | 12.11   | C22 H23 N3 O6 F3  |

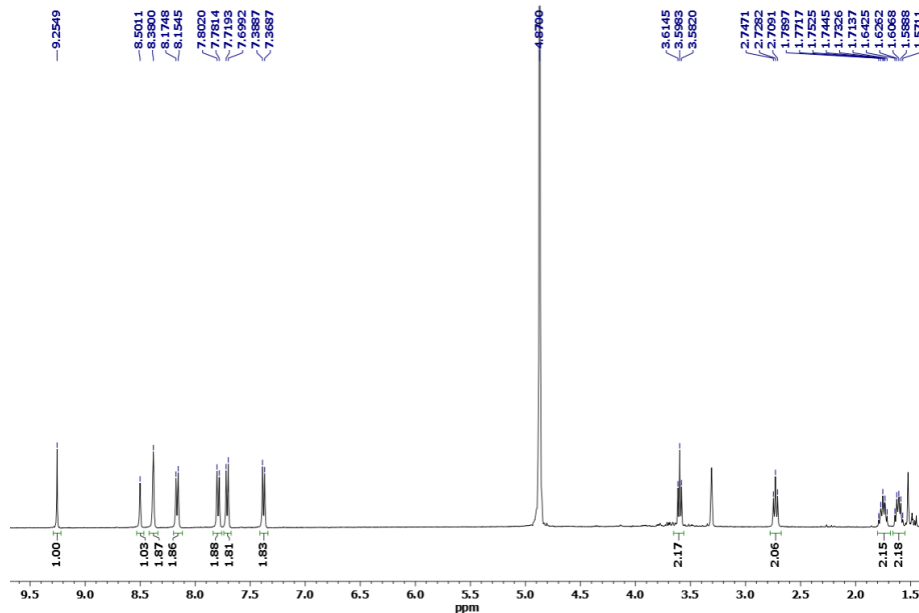

HPLC purity 99% ( $R_t = 7.40$  min)

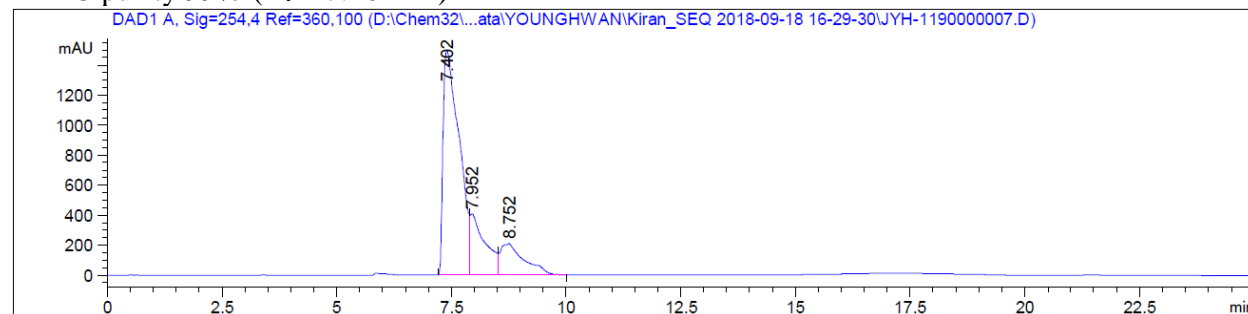

4'-(1-Aminocyclopropyl)-5-(4-(4-(trifluoromethyl)phenyl)-1*H*-1,2,3-triazol-1-yl)-[1,1'-biphenyl]-3-carboxylic acid (**22**).

#### Elemental Composition Report

##### Single Mass Analysis

Tolerance = 10.0 mDa / DBE: min = -1.5, max = 100.0

Element prediction: Off

Number of isotope peaks used for i-FIT = 3

Monoisotopic Mass, Even Electron Ions

73 formula(e) evaluated with 3 results within limits (up to 50 closest results for each mass)

Elements Used:

C: 0-125 H: 0-200 N: 4-4 O: 0-60 F: 3-3

JYH-14SEP18-117-2-1 205 (3.485) AM2 (Ar.42000.0.0.00.00); ABS

TOF MS ES+

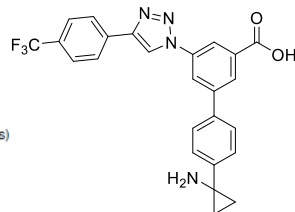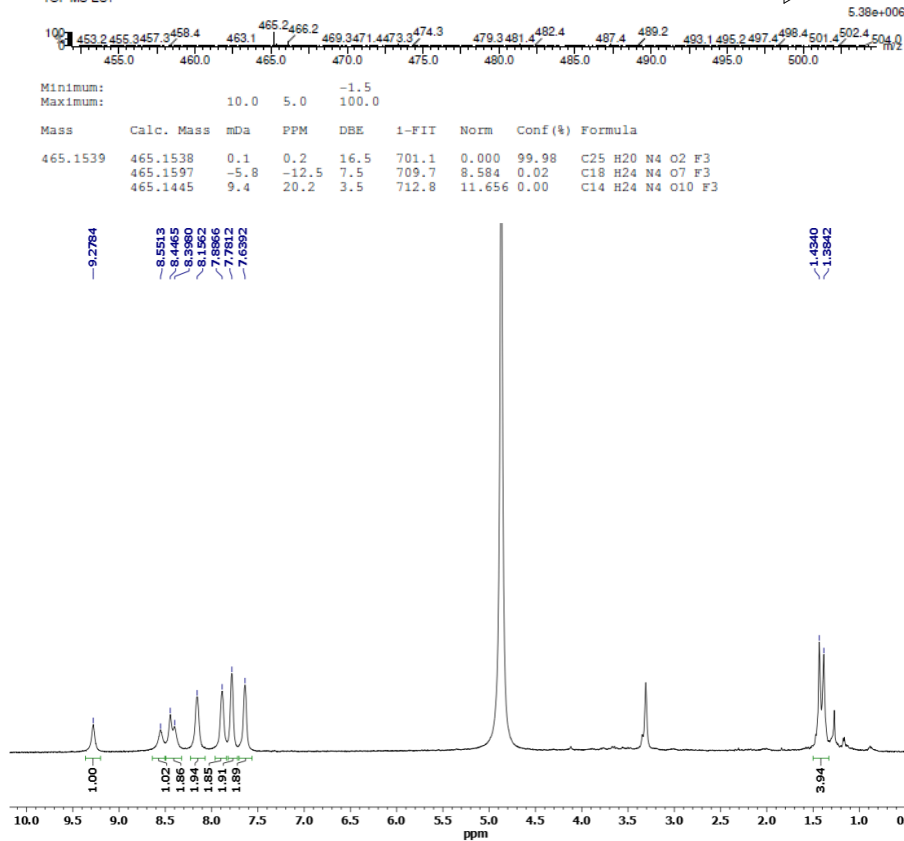

HPLC purity 98% ( $R_t = 6.80$  min)

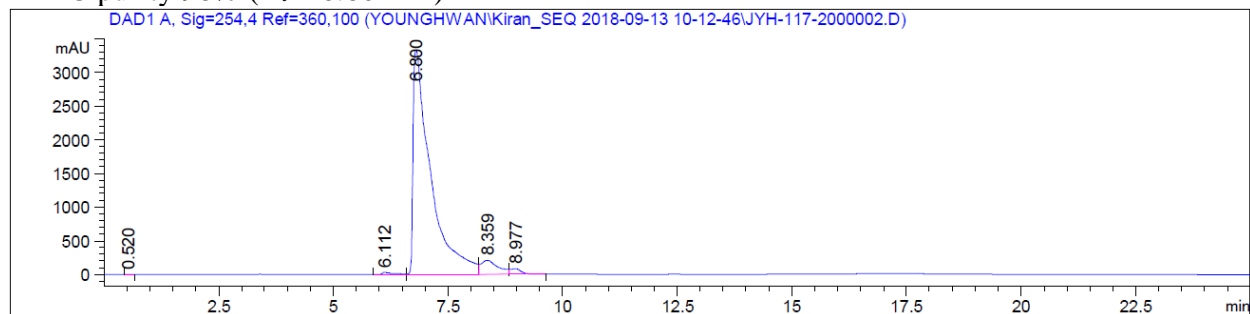

4'-(1-(Aminomethyl)cyclopropyl)-5-(4-(4-(trifluoromethyl)phenyl)-1*H*-1,2,3-triazol-1-yl)-[1,1'-biphenyl]-3-carboxylic acid (**23**).

#### Elemental Composition Report

##### Single Mass Analysis

Tolerance = 5.0 mDa / DBE: min = -1.5, max = 100.0

Element prediction: Off

Number of isotope peaks used for i-FIT = 3

Monoisotopic Mass, Even Electron Ions

73 formula(e) evaluated with 1 results within limits (up to 50 closest results for each mass)

Elements Used:

C: 0-200 H: 0-200 N: 4-4 O: 0-60 F: 3-3

JYH-11OCT18-131 239 (4.080) AM2 (Ar,25000.0,0.00,0.00); ABS

TOF MS ES+

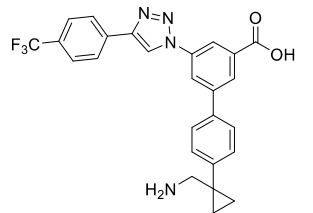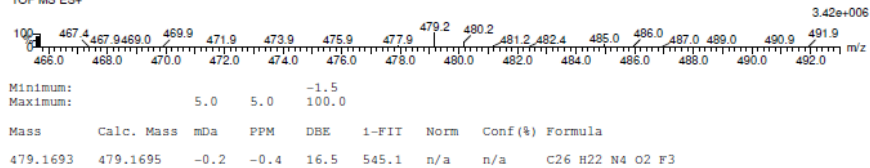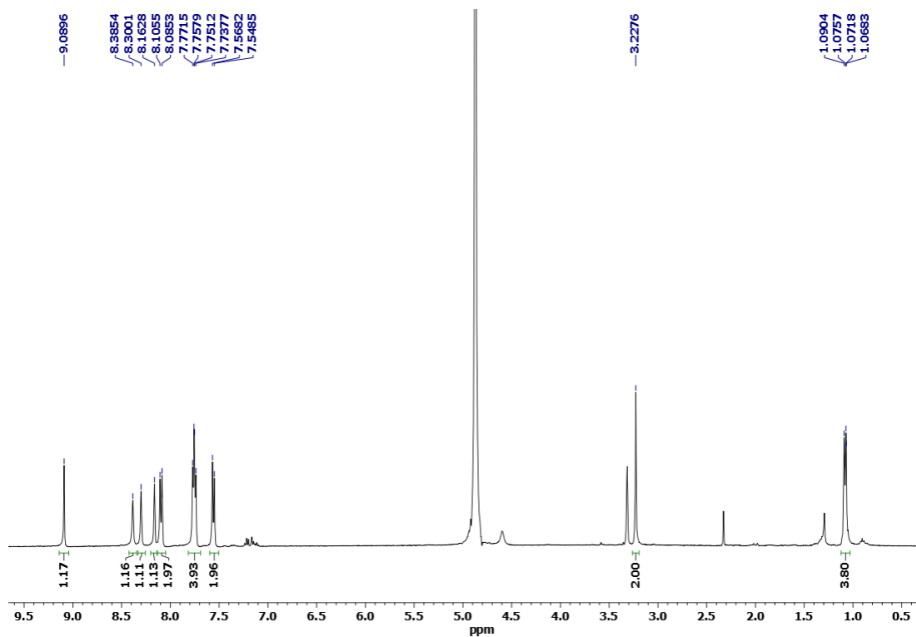

HPLC purity 97% ( $R_t = 10.85$  min)

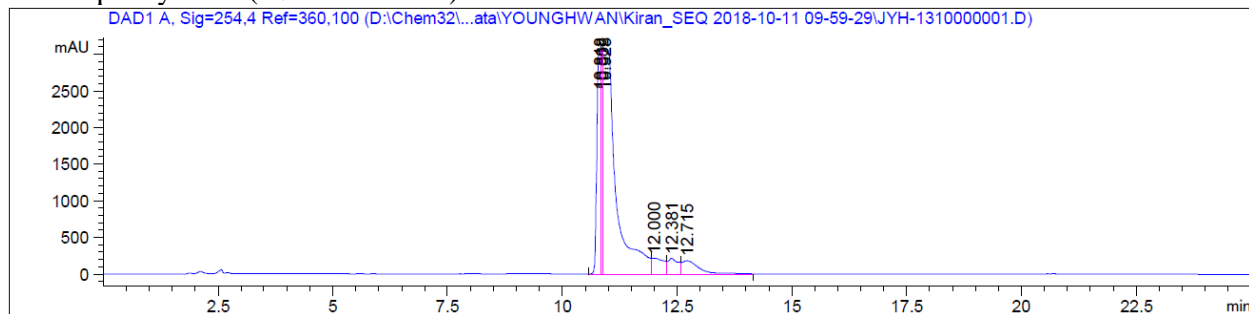

4'-((1-(((*tert*-Butoxycarbonyl)amino)methyl)cyclopropyl)-5-(4-(4-(trifluoromethyl)phenyl)-1*H*-1,2,3-triazol-1-yl)-[1,1'-biphenyl]-3-carboxylic acid (**24**).

#### Elemental Composition Report

##### Single Mass Analysis

Tolerance = 5.0 mDa / DBE: min = -1.5, max = 100.0

Element prediction: Off

Number of isotope peaks used for i-FIT = 3

Monoisotopic Mass, Even Electron Ions

111 formula(e) evaluated with 1 results within limits (up to 50 closest results for each mass)

Elements Used:

C: 0-100 H: 0-250 N: 4-4 O: 0-60 F: 3-3 Na: 1-1

JYH-0200CT19-128 142 (2.419) AM2 (Ar,25000.0,0.00,0.00); ABS

TOF MS ES+

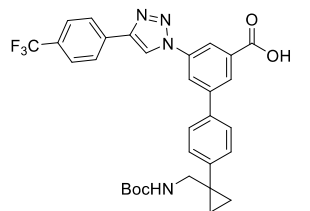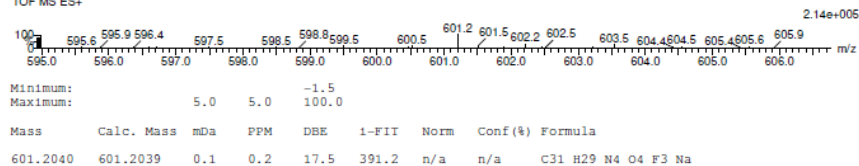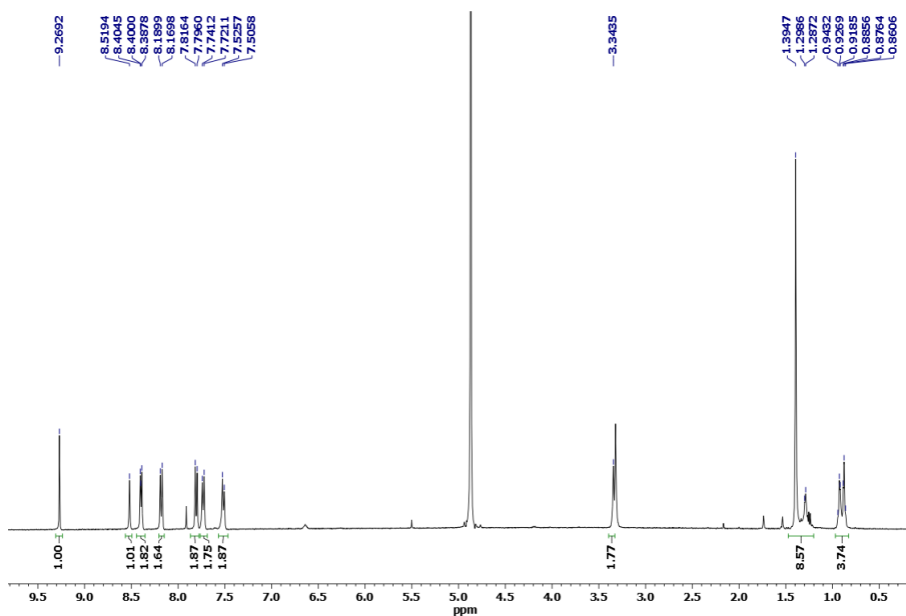

HPLC purity 99% ( $R_t = 21.57$  min)

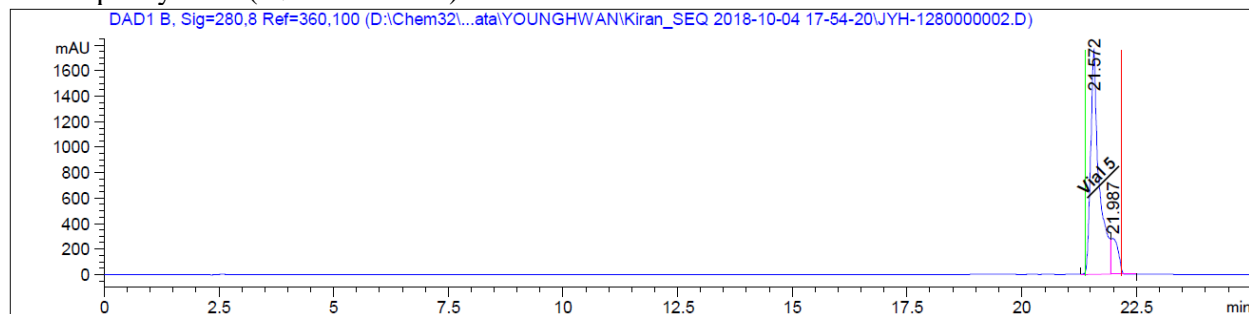

4'-(1-Aminocyclobutyl)-5-(4-(4-(trifluoromethyl)phenyl)-1*H*-1,2,3-triazol-1-yl)-[1,1'-biphenyl]-3-carboxylic acid (**25**).

#### Elemental Composition Report

##### Single Mass Analysis

Tolerance = 5.0 mDa / DBE: min = -1.5, max = 100.0

Element prediction: Off

Number of isotope peaks used for i-FIT = 3

Monoisotopic Mass, Even Electron Ions

73 formula(e) evaluated with 1 results within limits (up to 50 closest results for each mass)

Elements Used:

C: 0-100 H: 0-250 N: 4-4 O: 0-60 F: 3-3

JYH-28MAY19-230 103 (1.759) AM2 (Ar,25000.0,0.00,0.00); ABS

TOF MS ES+

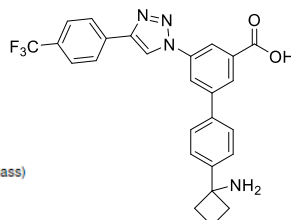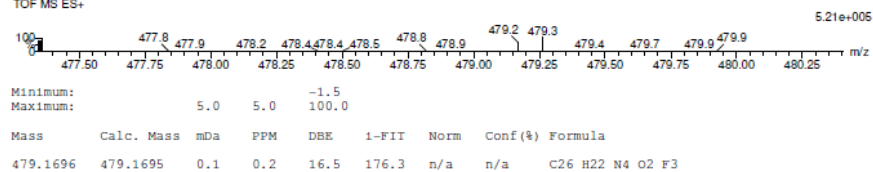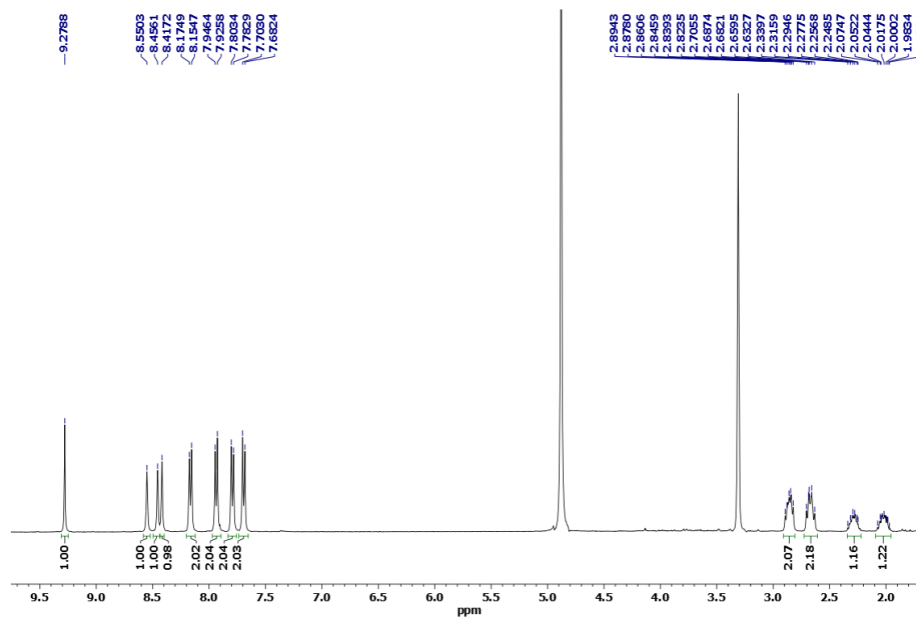

HPLC purity 99% ( $R_t = 8.69$  min)

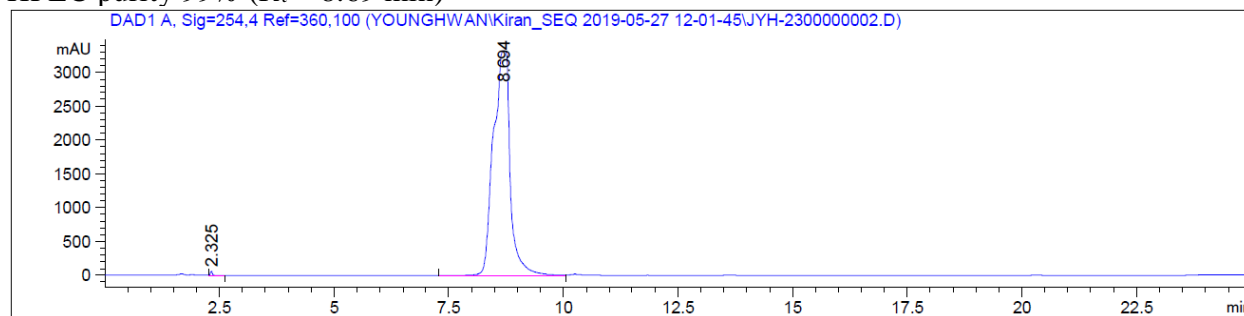

4'-((1-((*tert*-Butoxycarbonyl)amino)cyclobutyl)-5-(4-(4-(trifluoromethyl)phenyl)-1*H*-1,2,3-triazol-1-yl)-[1,1'-biphenyl]-3-carboxylic acid (**26**).

#### Elemental Composition Report

##### Single Mass Analysis

Tolerance = 5.0 mDa / DBE: min = -1.5, max = 100.0

Element prediction: Off

Number of isotope peaks used for i-FIT = 3

Monoisotopic Mass, Even Electron Ions

111 formula(e) evaluated with 1 results within limits (up to 50 closest results for each mass)

Elements Used:

C: 0-100 H: 0-250 N: 4-4 O: 0-60 F: 3-3

JYH-21MAY19-228 133 (2.267) AM2 (Ar,25000.0,0.00,0.00); ABS

TOF MS ES+

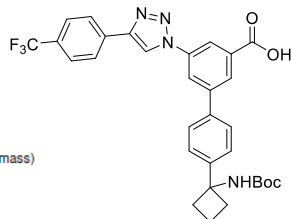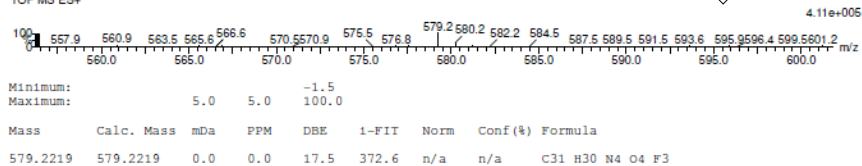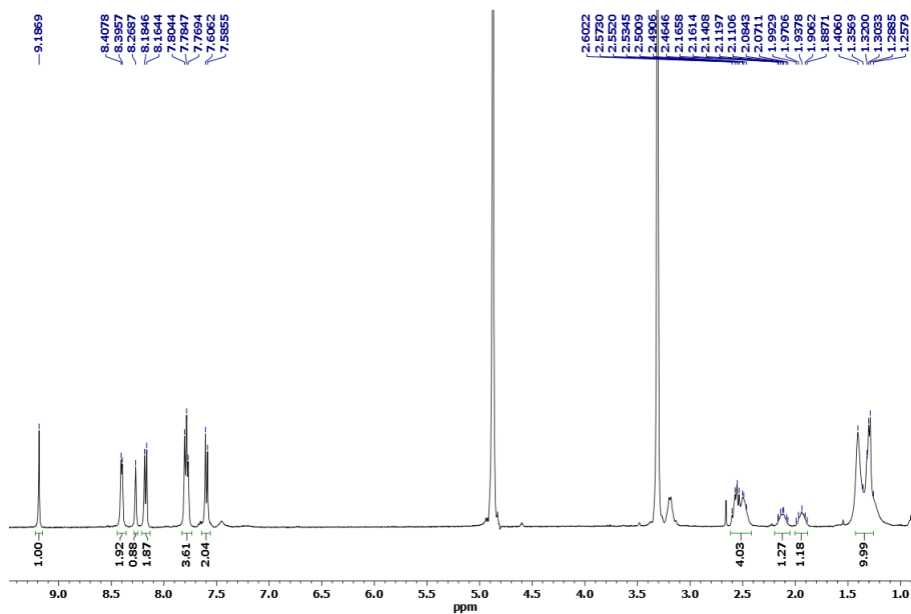

HPLC purity 99% ( $R_t = 10.76$  min)

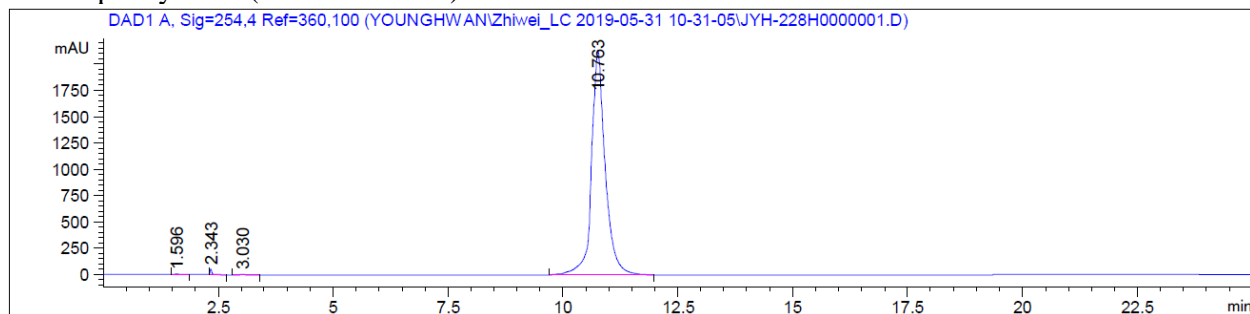

4'-(3-(Hydroxymethyl)oxetan-3-yl)-5-(4-(4-(trifluoromethyl)phenyl)-1*H*-1,2,3-triazol-1-yl)-[1,1'-biphenyl]-3-carboxylic acid (**27**).

#### Elemental Composition Report

##### Single Mass Analysis

Tolerance = 5.0 mDa / DBE: min = -1.5, max = 100.0

Element prediction: Off

Number of isotope peaks used for i-FIT = 3

Monoisotopic Mass, Even Electron Ions

84 formula(e) evaluated with 1 results within limits (up to 50 closest results for each mass)

Elements Used:

C: 0-150 H: 0-200 N: 3-3 O: 0-60 F: 3-3

JYH-02NOV18-138 114 (1.945) AM2 (Ar:25000.0,0.00,0.00); ABS

TOF MS ES+

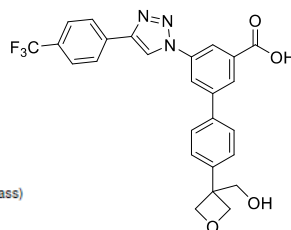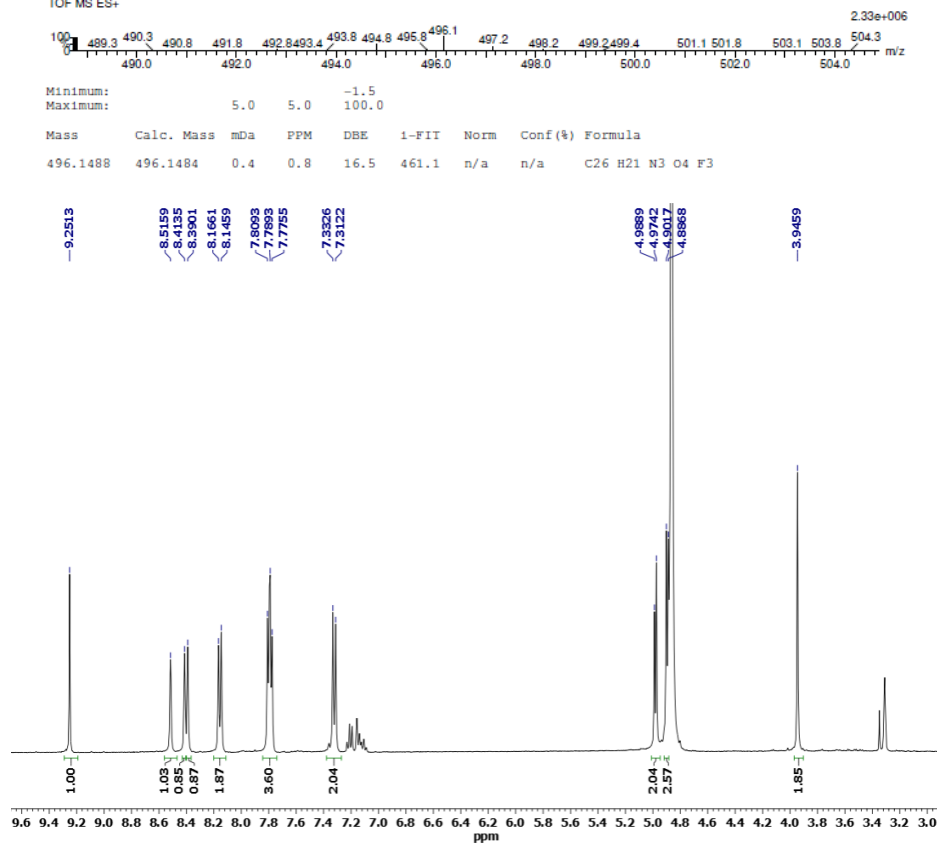

HPLC purity 99% ( $R_t = 8.71$  min)

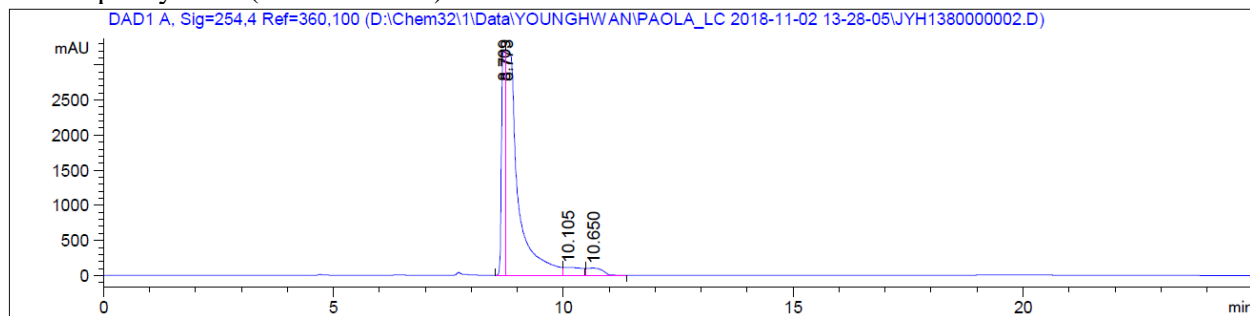

4'-(Isoxazol-3-yl)-5-(4-(4-(trifluoromethyl)phenyl)-1*H*-1,2,3-triazol-1-yl)-[1,1'-biphenyl]-3-carboxylic acid (**28**).

#### Elemental Composition Report

##### Single Mass Analysis

Tolerance = 5.0 mDa / DBE: min = -1.5, max = 100.0

Element prediction: Off

Number of isotope peaks used for i-FIT = 3

Monoisotopic Mass, Even Electron Ions

77 formula(e) evaluated with 1 results within limits (up to 50 closest results for each mass)

Elements Used:

C: 0-100 H: 0-250 N: 4-4 O: 0-60 F: 3-3

JYH-30OCT19-294 151 (2.571) AM2 (Ar,25000.0,0.00,0.00); ABS

TOF MS ES+

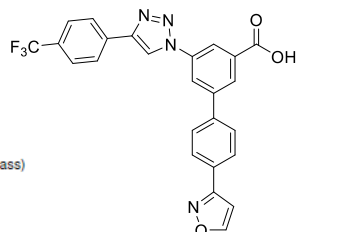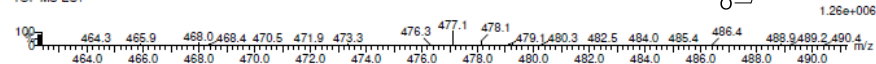

Minimum: -1.5  
Maximum: 100.0

| Mass     | Calc. Mass | mDa | PPM | DBE  | i-FIT | Norm | Conf(%) | Formula          |
|----------|------------|-----|-----|------|-------|------|---------|------------------|
| 477.1177 | 477.1175   | 0.2 | 0.4 | 18.5 | 368.5 | n/a  | n/a     | C25 H16 N4 O3 F3 |

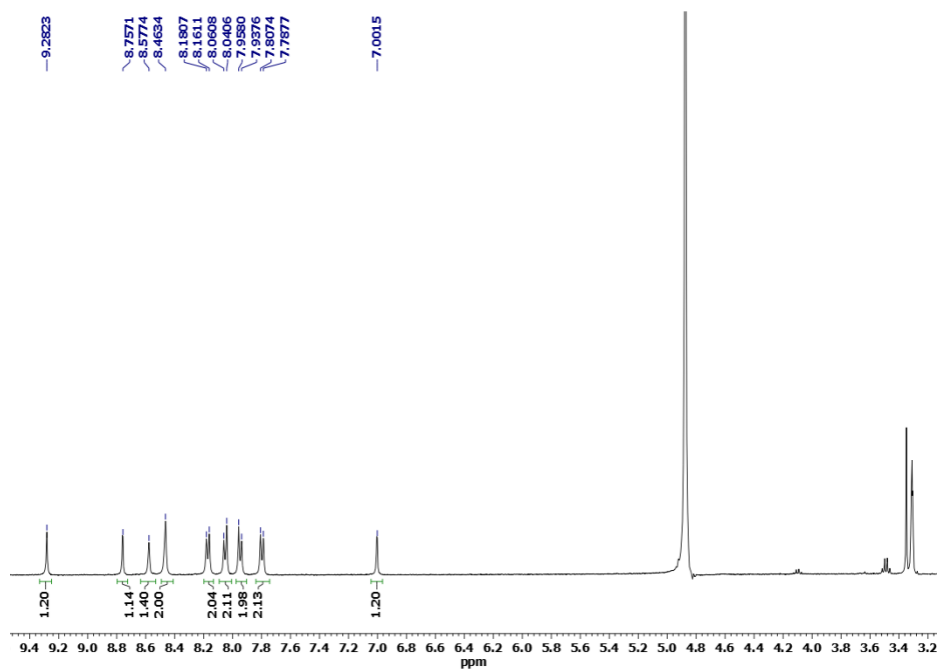

HPLC purity 98% ( $R_t = 11.86$  min)

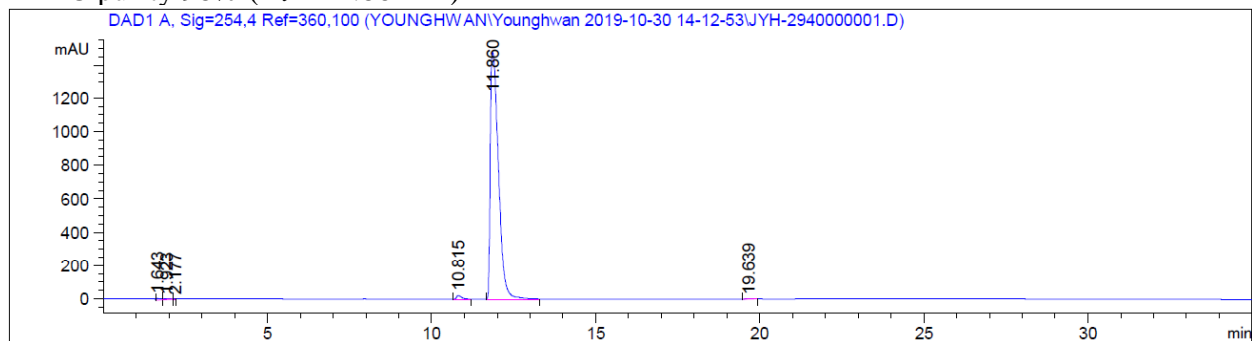

4'-(5-(Hydroxymethyl)isoxazol-3-yl)-5-(4-(4-(trifluoromethyl)phenyl)-1*H*-1,2,3-triazol-1-yl)-[1,1'-biphenyl]-3-carboxylic acid (**29**).

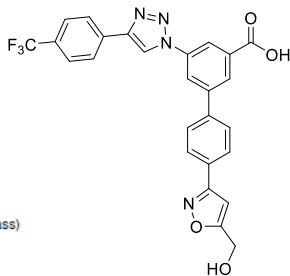

#### Elemental Composition Report

##### Single Mass Analysis

Tolerance = 5.0 mDa / DBE: min = -1.5, max = 100.0

Element prediction: Off

Number of isotope peaks used for i-FIT = 3

Monoisotopic Mass, Even Electron Ions

83 formula(e) evaluated with 1 results within limits (up to 50 closest results for each mass)

Elements Used:

C: 0-125 H: 0-200 N: 4-4 O: 0-60 F: 3-3

JYH-04OCT18-124 107 (1.827) AM2 (Ar,25000.0,0.00,0.00); ABS

TOF MS ES+

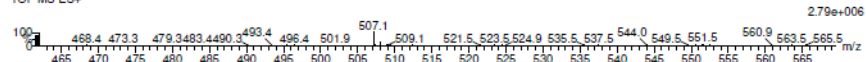

Minimum: 5.0 5.0 -1.5  
Maximum: 5.0 5.0 100.0

| Mass     | Calc. Mass | mDa  | PPM  | DBE  | 1-FIT | Norm | Conf(%) | Formula                                                                      |
|----------|------------|------|------|------|-------|------|---------|------------------------------------------------------------------------------|
| 507.1271 | 507.1280   | -0.9 | -1.8 | 18.5 | 551.2 | n/a  | n/a     | C <sub>26</sub> H <sub>18</sub> N <sub>4</sub> O <sub>4</sub> F <sub>3</sub> |

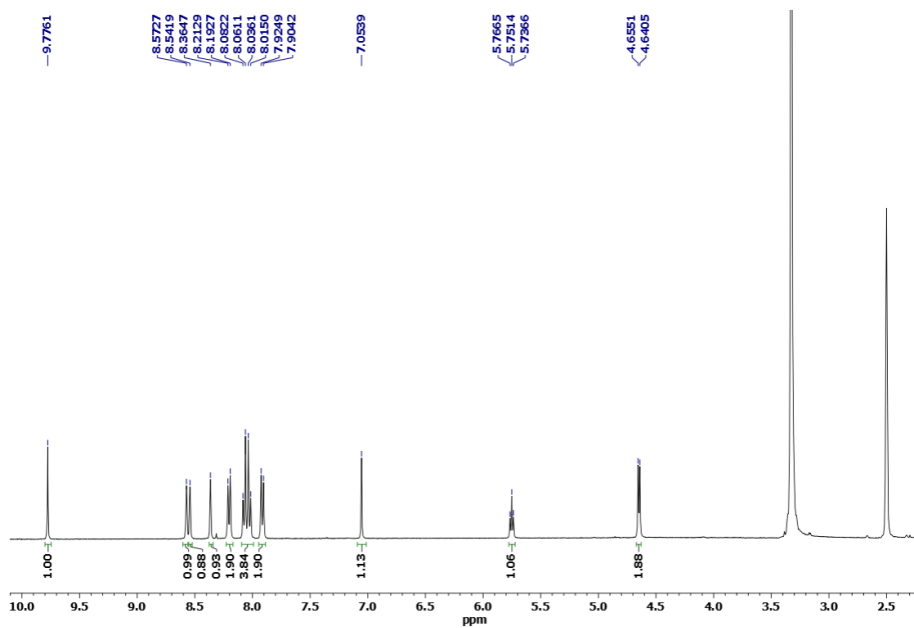

HPLC purity 98% ( $R_t = 20.10$  min)

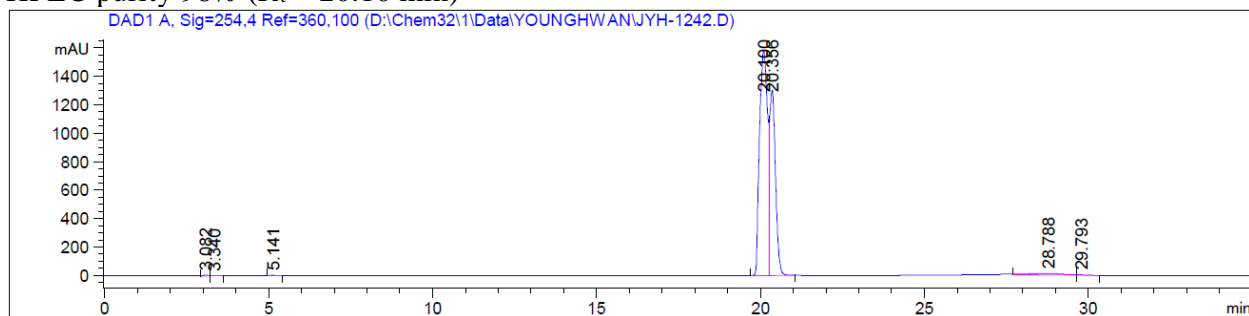

4'-(5-(2-Hydroxyethyl)isoxazol-3-yl)-5-(4-(4-(trifluoromethyl)phenyl)-1*H*-1,2,3-triazol-1-yl)-[1,1'-biphenyl]-3-carboxylic acid (**30**).

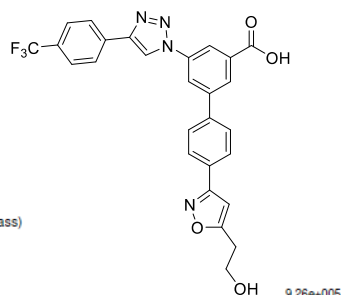

#### Elemental Composition Report

##### Single Mass Analysis

Tolerance = 5.0 mDa / DBE: min = -1.5, max = 100.0

Element prediction: Off

Number of isotope peaks used for i-FIT = 3

Monoisotopic Mass, Even Electron Ions

93 formula(e) evaluated with 1 results within limits (up to 50 closest results for each mass)

Elements Used:

C: 0-100 H: 0-250 N: 4-4 O: 0-60 F: 3-3

JYH-12NOV19-300 126 (2.148) AM2 (Ar:25000.0,0.00,0.00); ABS

TOF MS ES+

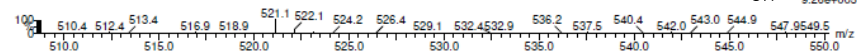

Minimum:

Maximum:

5.0 5.0 -1.5

100.0

| Mass     | Calc. Mass | mDa  | PPM  | DBE  | 1-FIT | Norm | Conf(%) | Formula          |
|----------|------------|------|------|------|-------|------|---------|------------------|
| 521.1435 | 521.1437   | -0.2 | -0.4 | 18.5 | 401.0 | n/a  | n/a     | C27 H20 N4 O4 F3 |

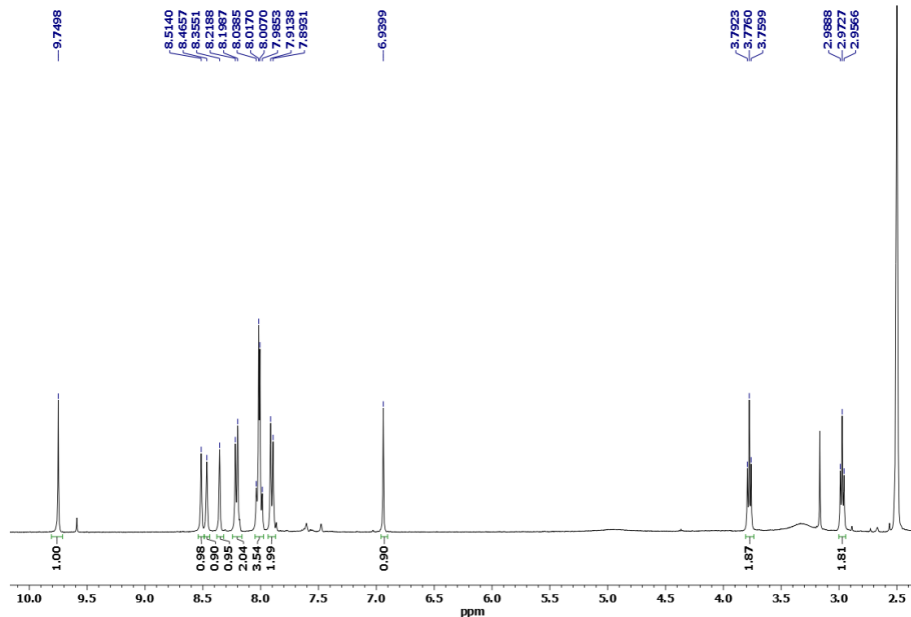

HPLC purity 95% ( $R_t = 10.69$  min)

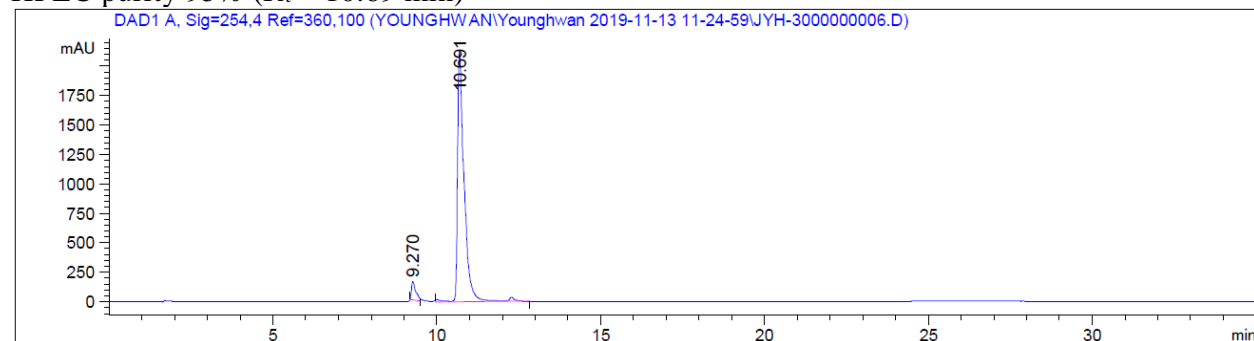

4'-(1*H*-Tetrazol-5-yl)-5-(4-(4-(trifluoromethyl)phenyl)-1*H*-1,2,3-triazol-1-yl)-[1,1'-biphenyl]-3-carboxylic acid (**31**).

#### Elemental Composition Report

##### Single Mass Analysis

Tolerance = 5.0 mDa / DBE: min = -1.5, max = 100.0

Element prediction: Off

Number of isotope peaks used for i-FIT = 3

Monoisotopic Mass, Even Electron Ions

70 formula(e) evaluated with 1 results within limits (up to 50 closest results for each mass)

Elements Used:

C: 0-100 H: 0-250 N: 7-7 O: 0-60 F: 3-3

JYH-13AUG19-258 222 (3.772) AM2 (Ar:25000.0.0.0.0.0.0); ABS

TOF MS ES+

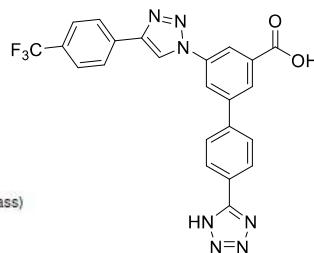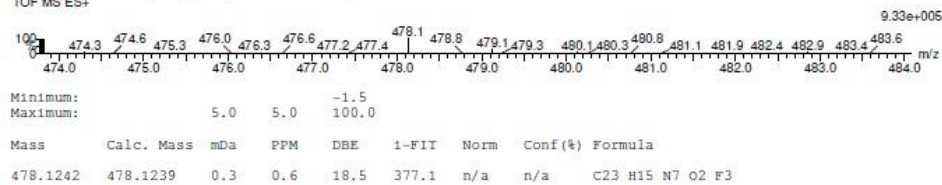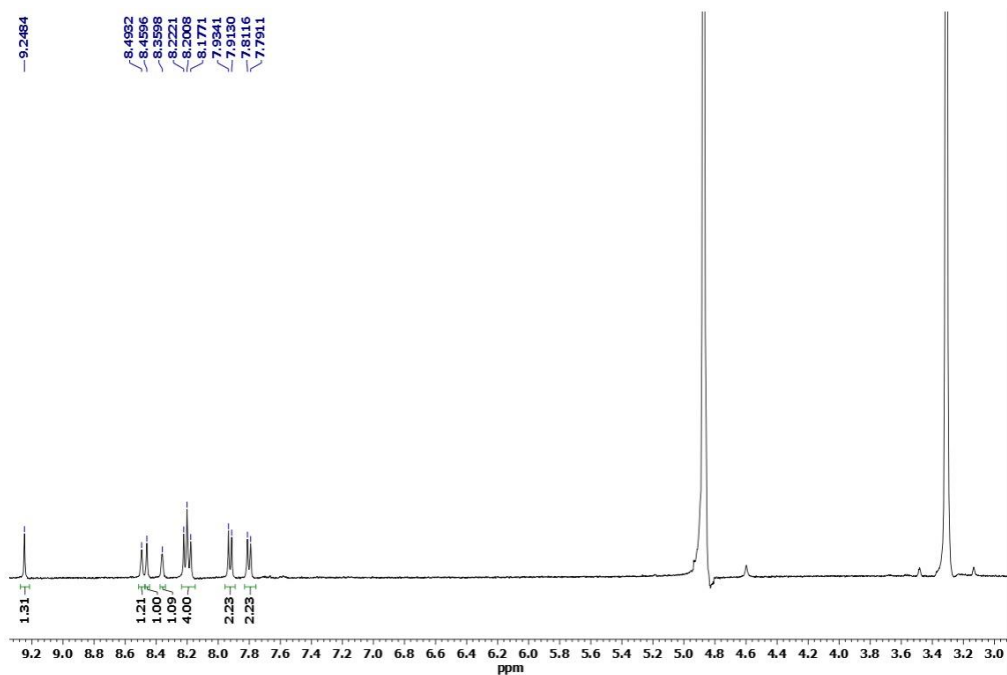

HPLC purity 98% ( $R_t = 15.95$  min)

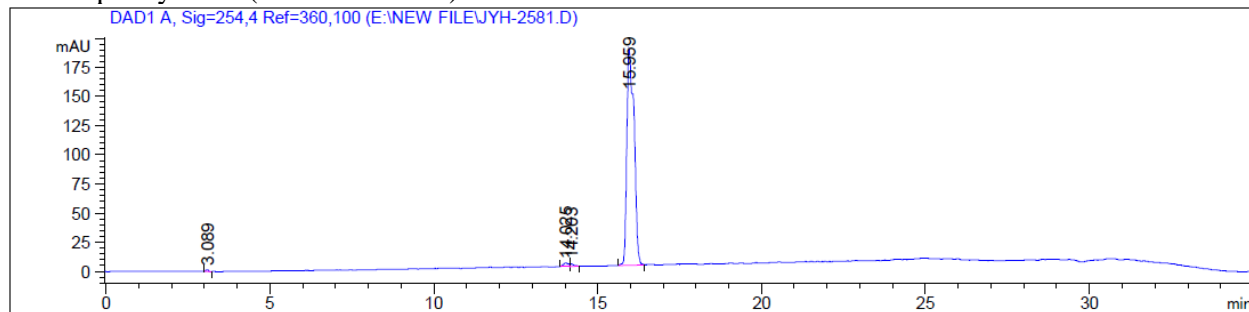

4-(4-(5-(Hydroxymethyl)isoxazol-3-yl)phenyl)-7-(4-(trifluoromethyl)phenyl)-2-naphthoic acid (**32**).

#### Elemental Composition Report

##### Single Mass Analysis

Tolerance = 5.0 mDa / DBE: min = -1.5, max = 100.0

Element prediction: Off

Number of isotope peaks used for i-FIT = 3

Monoisotopic Mass, Even Electron Ions

94 formula(e) evaluated with 1 results within limits (up to 50 closest results for each mass)

Elements Used:

C: 0-100 H: 0-250 N: 1-1 O: 0-60 F: 3-3

JYH-02JAN20-318 368 (6.242) AM2 (Ar:25000.0,0.00,0.00); ABS

TOF MS ES+

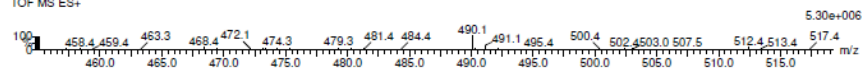

Minimum: -1.5  
Maximum: 5.0 5.0 100.0

| Mass     | Calc. Mass | mDa | PPM | DBE  | 1-FIT | Norm | Conf (%) | Formula         |
|----------|------------|-----|-----|------|-------|------|----------|-----------------|
| 490.1269 | 490.1266   | 0.3 | 0.6 | 18.5 | 657.9 | n/a  | n/a      | C28 H19 N O4 F3 |

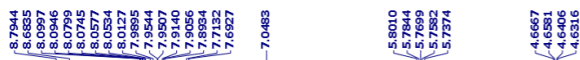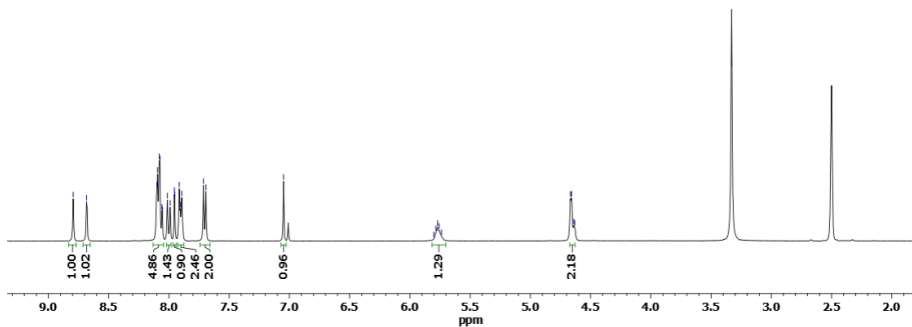

HPLC purity 98% ( $R_t = 12.07$  min)

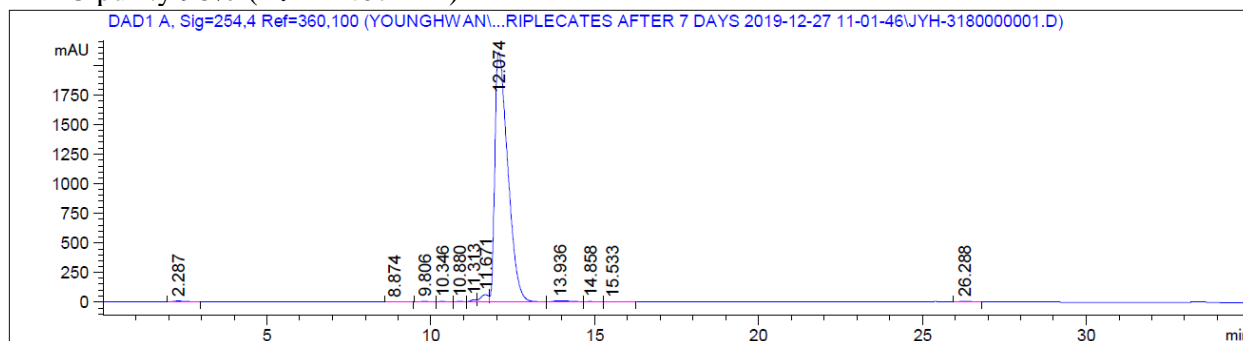

4'-(5-(Hydroxymethyl)isoxazol-3-yl)-5-(4-(trifluoromethyl)benzamido)-[1,1'-biphenyl]-3-carboxylic acid (**33**)

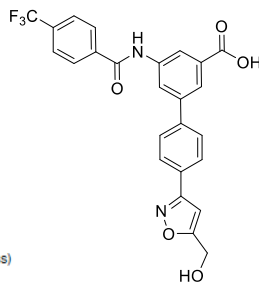

## Elemental Composition Report

## Single Mass Analysis

Tolerance = 5.0 mDa / DBE: min = -1.5, max = 100.0

Element prediction: Off

Number of isotope peaks used for i-FIT = 3

**Monoisotopic Mass, Even Electron Ions**

81 formula(e) evaluated with 1 results within limits (up to 50 closest results for each mass)

Elements Used:

C: 0-100   H: 0-250   N: 2-2   O: 0-60   F: 3-3

JYH-04FEB20-331-P 180 (3.062) AM2 (Ar,25000.0,0.00,0.00); ABS

TOF MS ES+

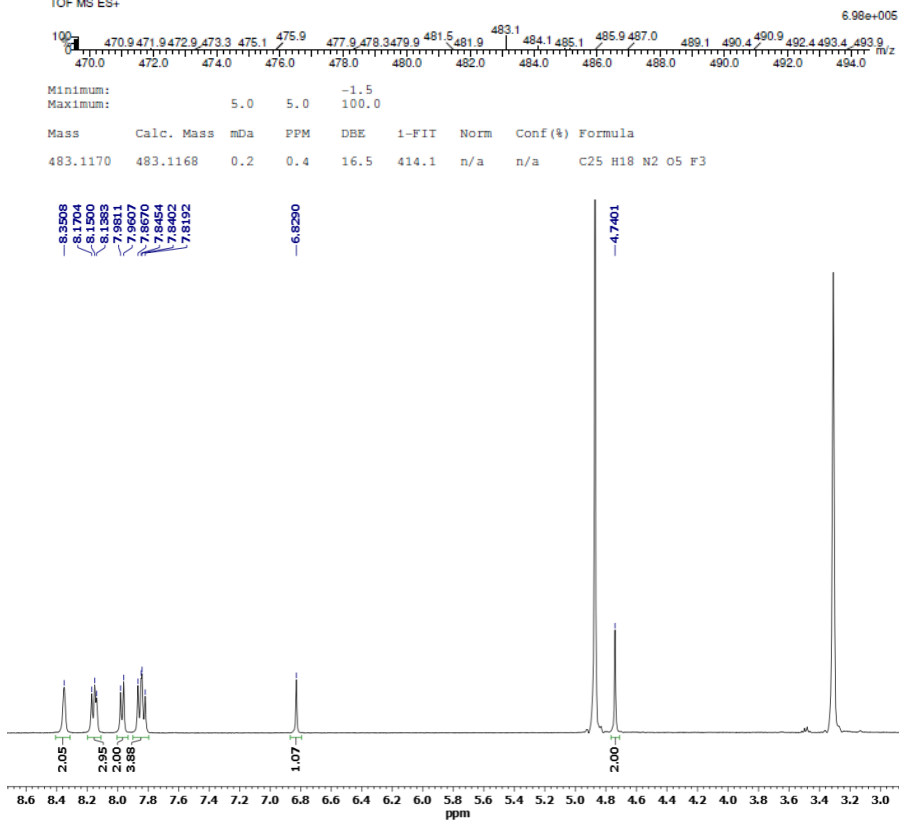

HPLC purity 99% ( $R_t = 10.29$  min)

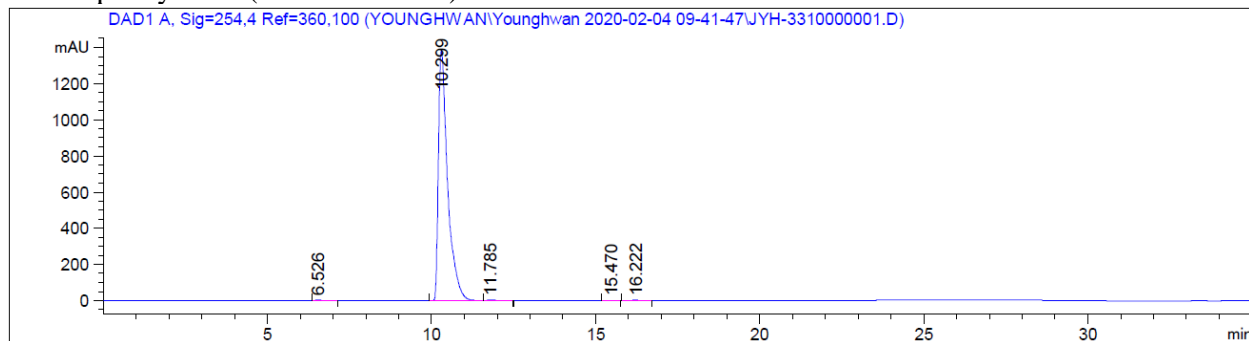

4-(4-(Piperidin-4-yl)phenyl)-6-(4-(4-(trifluoromethyl)phenyl)-1*H*-1,2,3-triazol-1-yl)picolinic acid (**34**).

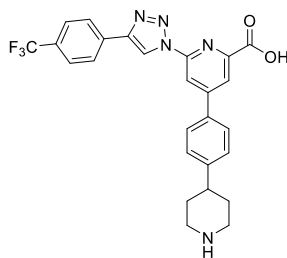

#### Elemental Composition Report

##### Single Mass Analysis

Tolerance = 5.0 mDa / DBE: min = -1.5, max = 100.0

Element prediction: Off

Number of isotope peaks used for i-FIT = 3

Monoisotopic Mass, Even Electron Ions

80 formula(e) evaluated with 1 results within limits (up to 50 closest results for each mass)

Elements Used:

C: 0-100 H: 0-250 N: 5-5 O: 0-60 F: 3-3

JYH-14JUN19-239-HPLC 108 (1.844) AM2 (Ar,25000.0,0.00,0.00); ABS

TOF MS ES+

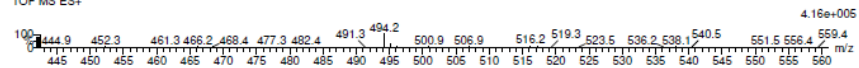

Minimum: -1.5  
Maximum: 5.0 5.0 100.0

| Mass     | Calc. Mass | mDa | PPM | DBE  | 1-FIT | Norm | Conf(%) | Formula                                                                      |
|----------|------------|-----|-----|------|-------|------|---------|------------------------------------------------------------------------------|
| 494.1805 | 494.1804   | 0.1 | 0.2 | 16.5 | 415.3 | n/a  | n/a     | C <sub>26</sub> H <sub>23</sub> N <sub>5</sub> O <sub>2</sub> F <sub>3</sub> |

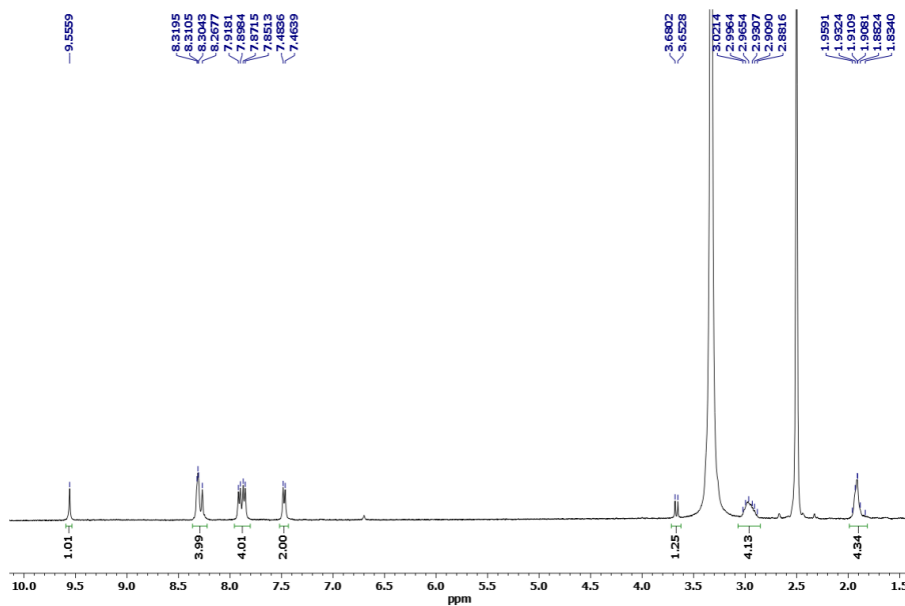

HPLC purity 99% ( $R_t = 7.87$  min)

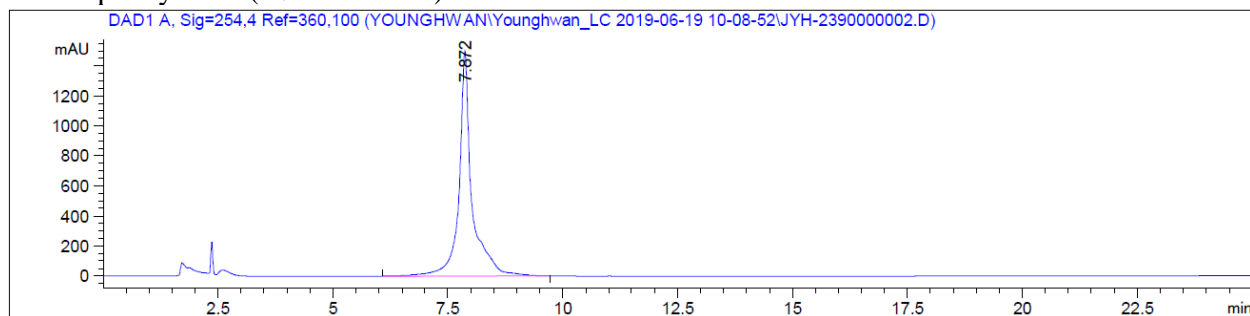



6-(4-(Piperidin-4-yl)phenyl)-4-(4-(4-(trifluoromethyl)phenyl)-1*H*-1,2,3-triazol-1-yl)picolinic acid (**36**).

#### Elemental Composition Report

##### Single Mass Analysis

Tolerance = 5.0 mDa / DBE: min = -1.5, max = 100.0

Element prediction: Off

Number of isotope peaks used for i-FIT = 3

Monoisotopic Mass, Even Electron Ions

80 formula(e) evaluated with 1 results within limits (up to 50 closest results for each mass)

Elements Used:

C: 0-100 H: 0-250 N: 5-5 O: 0-60 F: 3-3

JYH-05JUN20-363 208 (3.535) AM2 (Ar:25000.0,0.00,0.00); ABS

TOF MS ES+

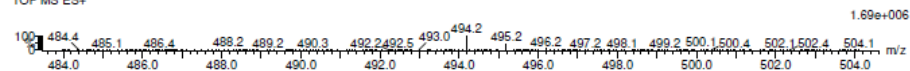

Minimum: -1.5  
Maximum: 100.0

| Mass     | Calc. Mass | mDa | PPM | DBE  | 1-FIT | Norm | Conf (%) | Formula          |
|----------|------------|-----|-----|------|-------|------|----------|------------------|
| 494.1808 | 494.1804   | 0.4 | 0.8 | 16.5 | 445.1 | n/a  | n/a      | C26 H23 N5 O2 F3 |

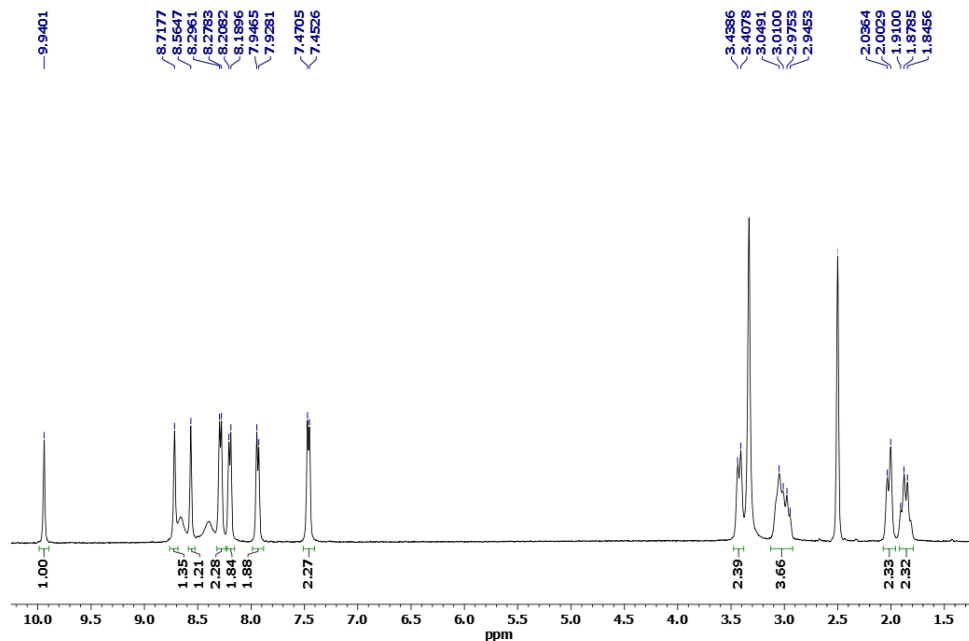

HPLC purity 99% ( $R_t = 11.24$  min)

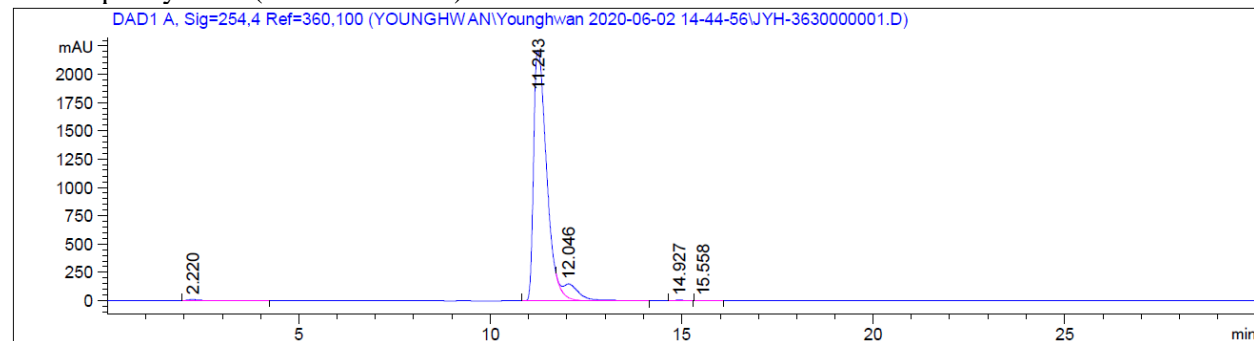

2-(Dimethylamino)-2-oxoethyl 4'-(piperidin-4-yl)-5-(4-(4-(trifluoromethyl)phenyl)-1H-1,2,3-triazol-1-yl)-[1,1'-biphenyl]-3-carboxylate (**37a**).

#### Elemental Composition Report

##### Single Mass Analysis

Tolerance = 5.0 mDa / DBE: min = -1.5, max = 100.0

Element prediction: Off

Number of isotope peaks used for i-FIT = 3

Monoisotopic Mass, Even Electron Ions

114 formula(e) evaluated with 2 results within limits (up to 50 closest results for each mass)

Elements Used:

C: 0-100 H: 0-200 N: 5-5 O: 0-40 F: 3-3

JYH-21JUN18-085 133 (2.266) AM2 (Ar,22000.0,0.00,0.00); ABS

TOF MS ES+

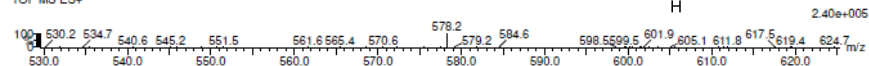

Minimum: -1.5  
Maximum: 5.0 5.0 100.0

| Mass     | Calc. Mass | mDa  | PPM  | DBE  | 1-FIT | Norm  | Conf(%) | Formula          |
|----------|------------|------|------|------|-------|-------|---------|------------------|
| 578.2390 | 578.2379   | 1.1  | 1.9  | 17.5 | 35.3  | 0.121 | 88.63   | C31 H31 N5 O3 F3 |
| 578.2438 |            | -4.8 | -8.3 | 8.5  | 37.3  | 2.174 | 11.37   | C24 H35 N5 O8 F3 |

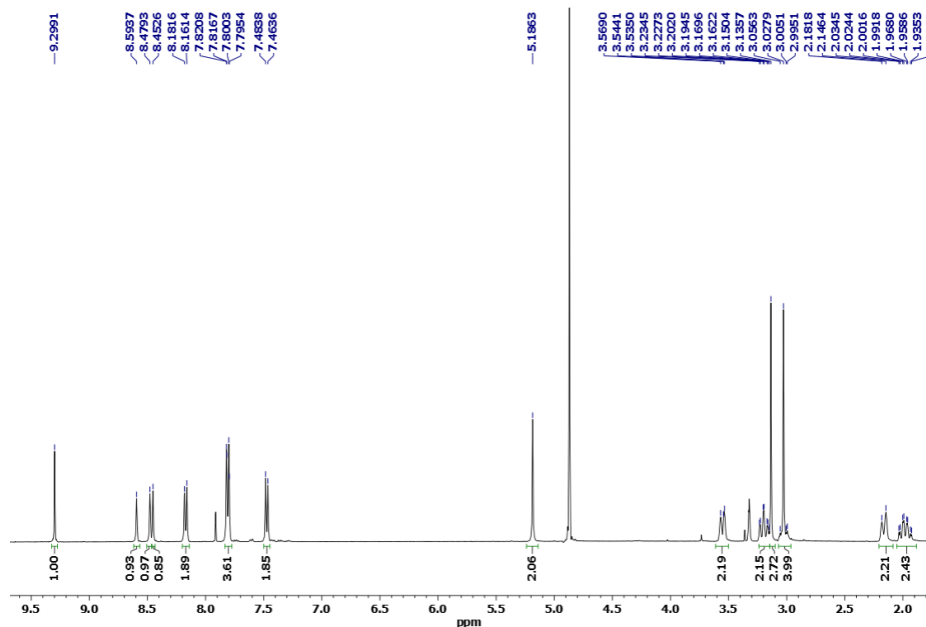

HPLC purity 97% ( $R_t = 20.45$  min)

DAD1 A, Sig=254,4 Ref=360,100 (F:\JYH06501.D)

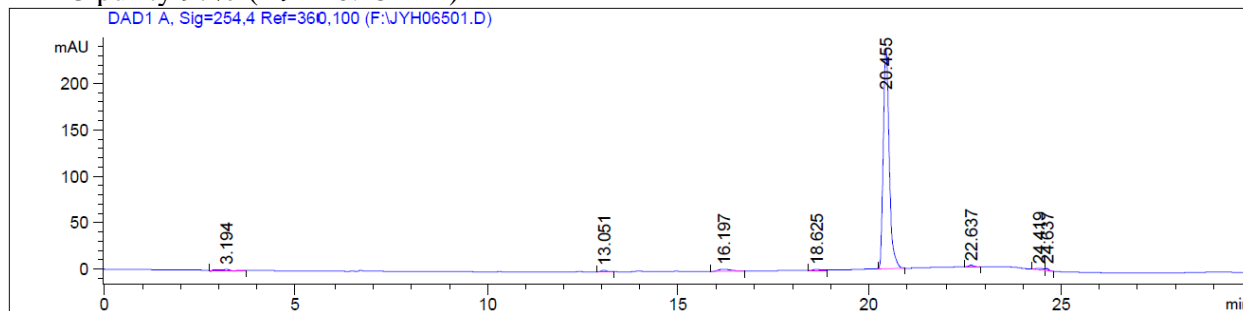

2-(Dimethylamino)-2-oxoethyl 4-(4-(5-(hydroxymethyl)isoxazol-3-yl)phenyl)-7-(4-(trifluoromethyl)phenyl)-2-naphthoate (**37b**).

#### Elemental Composition Report

##### Single Mass Analysis

Tolerance = 8.0 mDa / DBE: min = -1.5, max = 100.0

Element prediction: Off

Number of isotope peaks used for i-FIT = 3

Monoisotopic Mass, Even Electron Ions

116 formula(e) evaluated with 3 results within limits (up to 50 closest results for each mass)

Elements Used:

C: 0-100 H: 0-250 N: 2-2 O: 0-60 F: 3-3

JYH-23JAN20-328-1.91 (1.556) AM2 (Ar.25000.0,0.00,0.00); ABS

TOF MS ES+

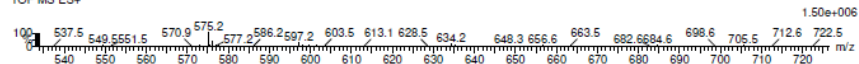

Minimum: -1.5  
Maximum: 100.0

| Mass     | Calc. Mass | mDa  | PPM   | DBE  | 1-FIT | Norm  | Conf(%) | Formula           |
|----------|------------|------|-------|------|-------|-------|---------|-------------------|
| 575.1786 | 575.1794   | -0.8 | -1.4  | 19.5 | 412.8 | 0.033 | 96.75   | C32 H26 N2 O5 F3  |
| 575.1735 | 575.1735   | 5.1  | 8.9   | 28.5 | 417.9 | 5.120 | 0.60    | C39 H22 N2 F3     |
| 575.1853 | 575.1853   | -6.7 | -11.6 | 10.5 | 416.4 | 3.631 | 2.65    | C25 H30 N2 O10 F3 |

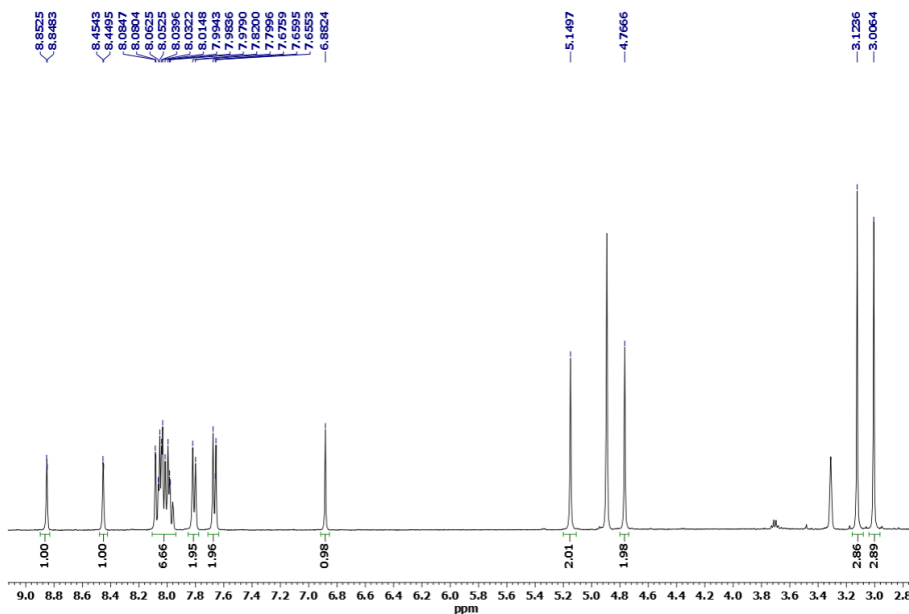

HPLC purity 99% ( $R_t = 17.73$  min)

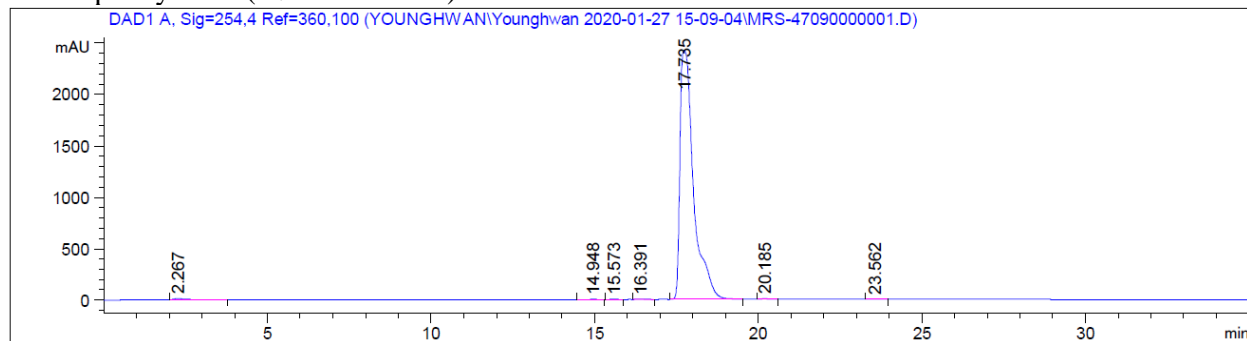

2-(Dimethylamino)-2-oxoethyl 4-(4-(1-acetypiperidin-4-yl)phenyl)-7-(4-(trifluoromethyl)phenyl)-2-naphthoate (**37c**).

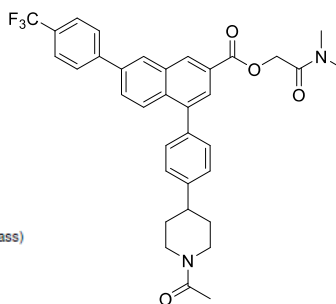

#### Elemental Composition Report

##### Single Mass Analysis

Tolerance = 5.0 mDa / DBE: min = -1.5, max = 100.0

Element prediction: Off

Number of isotope peaks used for i-FIT = 3

Monoisotopic Mass, Even Electron Ions

129 formula(e) evaluated with 1 results within limits (up to 50 closest results for each mass)

Elements Used:

C: 0-100 H: 0-250 N: 2-2 O: 0-60 F: 3-3

JYH-02JUN20-359 162 (2.757) AM2 (Ar:25000.0,0.0,0.00); ABS

TOF MS ES+

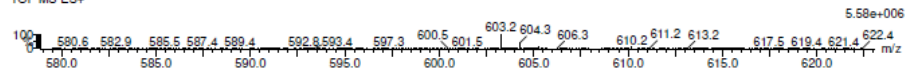

Minimum: 5.0 5.0 -1.5  
Maximum: 5.0 5.0 100.0

| Mass     | Calc. Mass | mDa | PPM | DBE  | 1-FIT | Norm | Conf(%) | Formula          |
|----------|------------|-----|-----|------|-------|------|---------|------------------|
| 603.2479 | 603.2471   | 0.8 | 1.3 | 18.5 | 547.9 | n/a  | n/a     | C35 H34 N2 O4 F3 |

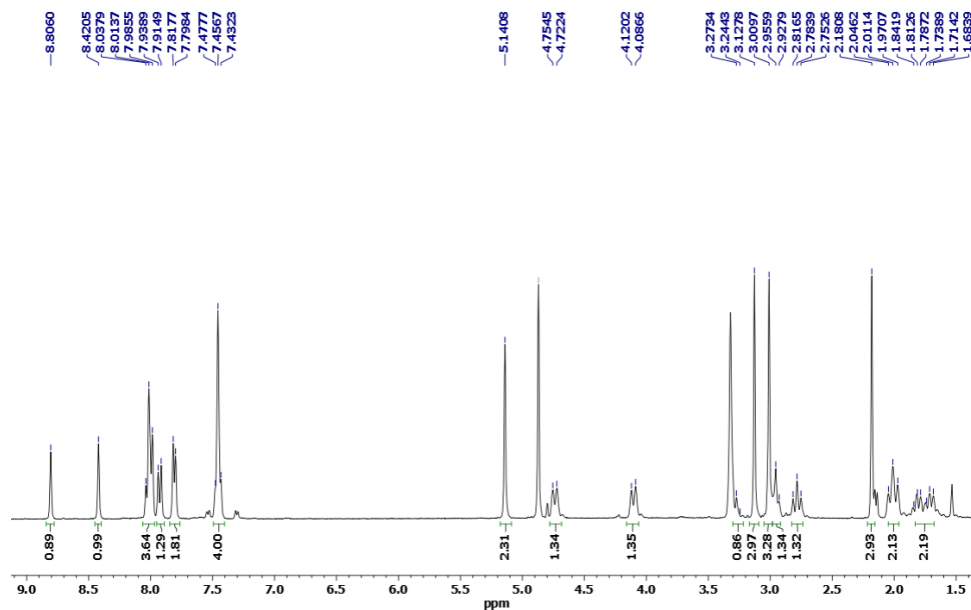

**HPLC purity 99% ( $R_t$  = 16.43 min)**

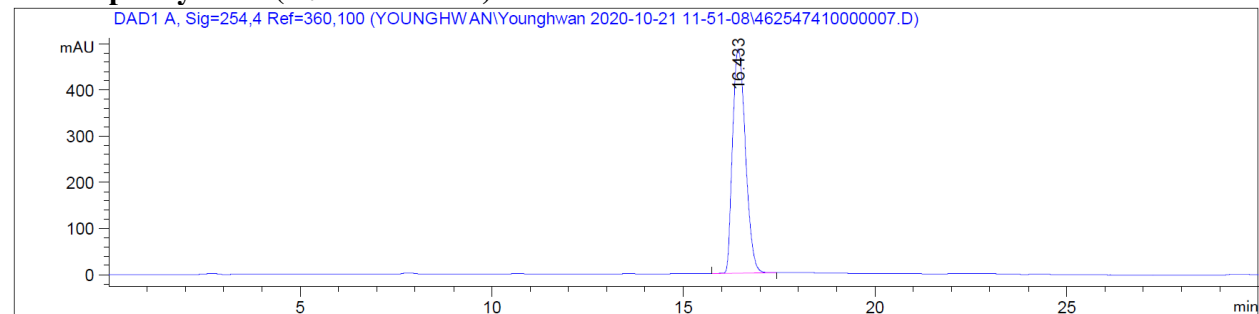

**ADMET properties of compound 32 (MRS4654).** Determined by Jai Research Foundation (JRF), Department of Toxicology, Valvada - 396 105, Dist. Valsad, Gujarat, India; Protocol RES 1-02-26140 (MRS4654).

Simulated gastric fluid (SGF)

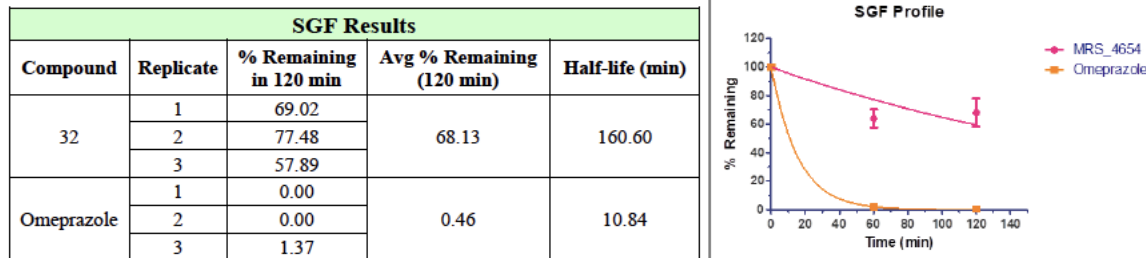

Simulated intestinal fluid (SIF)

| SIF Results |           |                        |                           |                 |
|-------------|-----------|------------------------|---------------------------|-----------------|
| Compound    | Replicate | % Remaining in 120 min | Avg % Remaining (120 min) | Half-life (min) |
| 32          | 1         | 130.73                 | 114.41                    | NA              |
|             | 2         | 107.29                 |                           |                 |
|             | 3         | 105.20                 |                           |                 |
| Verapamil   | 1         | 130.85                 | 125.65                    | NA              |
|             | 2         | 120.47                 |                           |                 |
|             | 3         | 125.62                 |                           |                 |

NA=Not Applicable

Liver microsome stability (human, rat, mouse)

| Microsomal stability Results HLM |                      |                 |                     |                                          |                                              |
|----------------------------------|----------------------|-----------------|---------------------|------------------------------------------|----------------------------------------------|
| Compound                         | % Remaining (60 min) | Half life (min) | Avg Half life (min) | CL <sub>int</sub> (μL/min/mg of protein) | Avg CL <sub>int</sub> (μL/min/mg of protein) |
| 32-Set 1                         | 112.60               | NA              | Stable              | NA                                       | NA                                           |
| 32-Set 2                         | 115.70               | NA              |                     | NA                                       |                                              |
| Testosterone-Set 1               | 9.12                 | 9.43            | 10.13               | 44.11                                    | 41.25                                        |
| Testosterone-Set 2               | 9.34                 | 10.83           |                     | 38.39                                    |                                              |

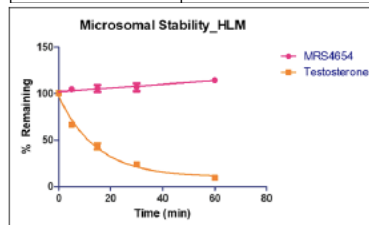

| Microsomal stability Results RLM |                      |                 |                     |                                          |                                              |
|----------------------------------|----------------------|-----------------|---------------------|------------------------------------------|----------------------------------------------|
| Compound                         | % Remaining (60 min) | Half-life (min) | Avg Half-life (min) | CL <sub>int</sub> (μL/min/mg of protein) | Avg CL <sub>int</sub> (μL/min/mg of protein) |
| 32-Set 1                         | 51.19                | 52.34           | 47.68               | 7.94                                     | 8.80                                         |
| 32-Set 2                         | 45.68                | 43.02           |                     | 9.67                                     |                                              |
| Testosterone-Set 1               | 3.65                 | 1.43            | 1.52                | 290.16                                   | 273.89                                       |
| Testosterone-Set 2               | 3.83                 | 1.61            |                     | 257.62                                   |                                              |

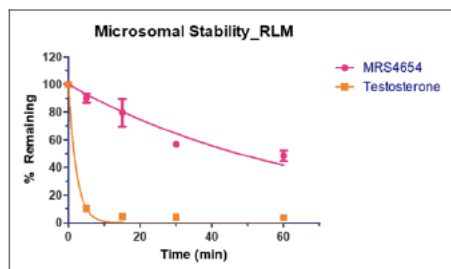

| Microsomal stability Results MLM |                      |                 |                     |                                          |                                              |
|----------------------------------|----------------------|-----------------|---------------------|------------------------------------------|----------------------------------------------|
| Compound                         | % Remaining (60 min) | Half life (min) | Avg Half life (min) | CL <sub>int</sub> (μL/min/mg of protein) | Avg CL <sub>int</sub> (μL/min/mg of protein) |
| 32-Set 1                         | 148.46               | NA              | Stable              | NA                                       | NA                                           |
| 32-Set 2                         | 116.07               | NA              |                     | NA                                       |                                              |
| Testosterone-Set 1               | 16.24                | 11.28           | 11.58               | 36.86                                    | 35.95                                        |
| Testosterone-Set 2               | 16.64                | 11.87           |                     | 35.03                                    |                                              |

NA= Not Applicable

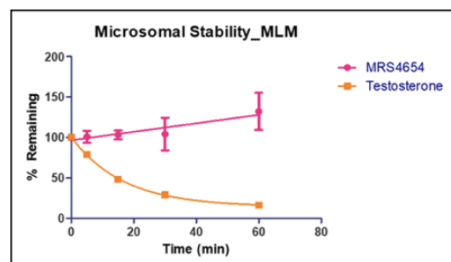

## Caco2 cell permeability

| Compound Name                                                | Average Values                 |                  |              |                   |                   |                |
|--------------------------------------------------------------|--------------------------------|------------------|--------------|-------------------|-------------------|----------------|
|                                                              | Papp (10 <sup>-6</sup> cm/sec) |                  | Efflux Ratio | A to B % Recovery | B to A % Recovery | Classification |
|                                                              | Apical to Basal                | Basal to Apical  |              |                   |                   |                |
| 32                                                           | 0.00                           | 1.32             | NC           | 10.39             | 58.12             | LOW            |
| Digoxin                                                      | 2.12                           | 11.77            | 6.38         | 91.00             | 96.23             | MEDIUM         |
| Propranolol                                                  | 25.07                          | 21.74            | 0.86         | 68.10             | 86.70             | HIGH           |
| Atenolol                                                     | 0.45                           | 0.30             | 0.66         | 83.58             | 86.95             | LOW            |
| NC: denotes Not calculated; as very low Papp in A-B and B-A. |                                |                  |              |                   |                   |                |
| Efflux ratio > 2 is Efflux indicated                         |                                |                  |              |                   |                   |                |
| Result of permeability Papp (10 <sup>-6</sup> cm/s)          |                                | Range            |              |                   |                   |                |
| <1.5                                                         |                                | Low permeable    |              |                   |                   |                |
| 1.5 to 10                                                    |                                | Medium permeable |              |                   |                   |                |
| >10                                                          |                                | High permeable   |              |                   |                   |                |

**Figure S10. Time (h) – mean plasma concentration (ng/mL) graph for compound 32.**

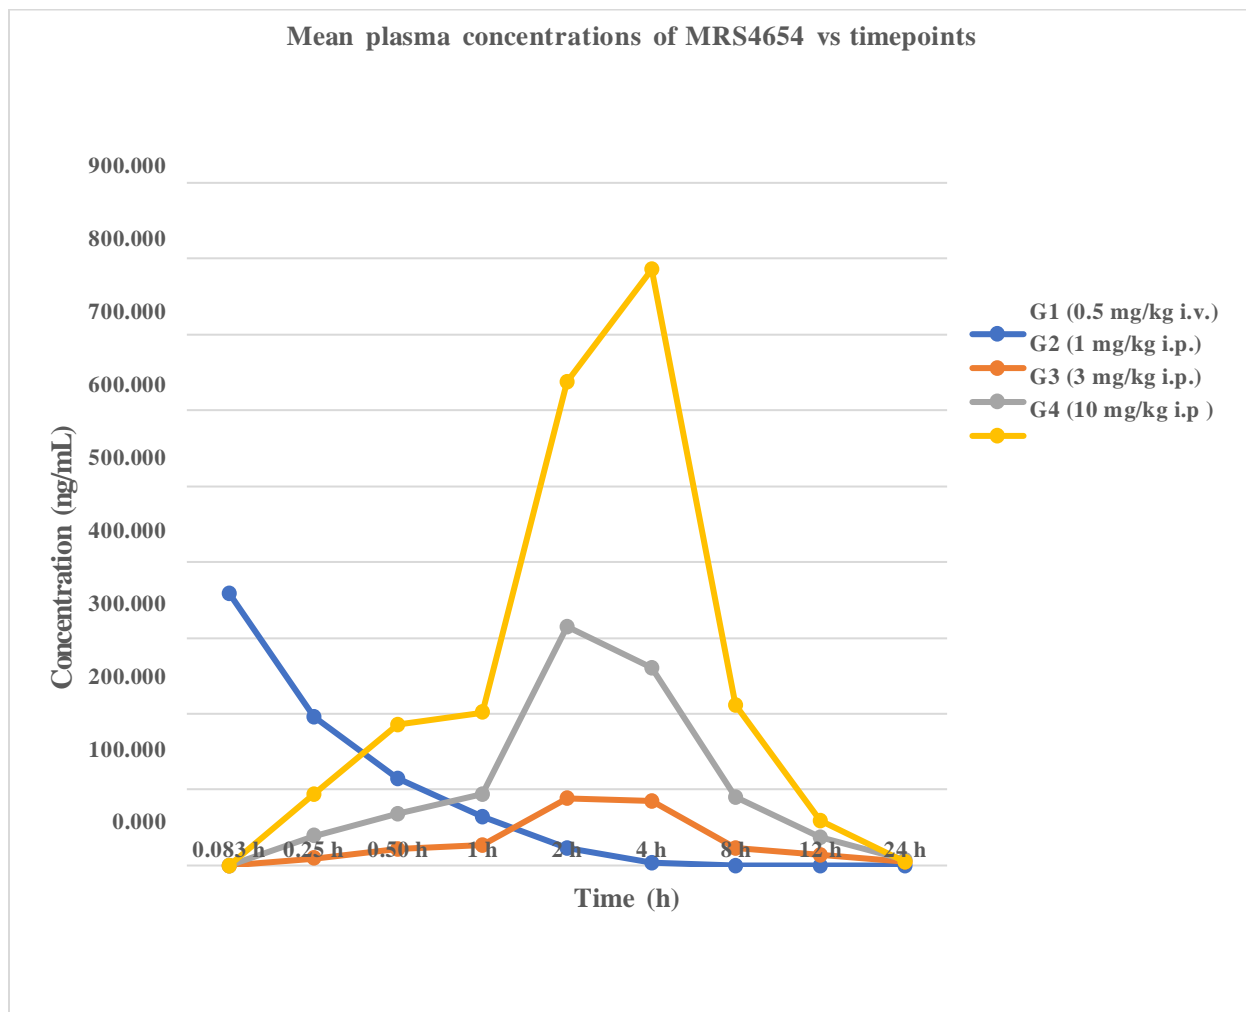

## Patch clamp hERG assay

ScreenPatch® Assay (SyncroPatch® 384PE Based Assay), performed by Charles River Cleveland, Inc., 14656 Neo Parkway, Cleveland, OH 44128 USA.

Procedure: Cells were cultured in Ham's F-12 supplemented with 10% fetal bovine serum, 100 U/mL penicillin G sodium, 100 µg/mL streptomycin sulfate and 400 µg/mL Zeocin. Before testing, cells in culture dishes were rinsed with Hank's Balanced Salt Solution, detached with Accutase. Immediately before use in the SyncroPatch® 384PE system, the cells were washed in HB-PS to remove the Accutase and re-suspended in 20 mL of HB-PS.

The test article effects were evaluated using SyncroPatch® 384PE systems (SP384PE; Nanion Technologies, Livingston, NJ). HEPES-buffered intracellular solution (Charles River proprietary) for whole cell recordings was loaded into the intracellular compartment of the SP384PE. Extracellular buffer (HB-PS) and Cell suspension (in HB-PS) were pipetted into the extracellular compartment of the SP384PE chip. After establishment of a whole-cell configuration, membrane currents were recorded using patch clamp amplifier in the SP384PE system. Test article (TA) concentrations were applied to naïve cells (n = 4, where n = replicates/ concentration). Each application consisted of addition of 40 µL of 2X concentrated test article solution to the total 80 µL of final volume of the extracellular well of the SP384PE chip. Duration of exposure to each compound concentration was five (5) minutes.

**hERG Test Voltage Protocol.** hERG current was measured using stimulus voltage patterns with fixed amplitudes: activation pre-pulse (TP1) to +40 mV for 2 s and test pulse (TP2) to -40 mV for 2 s from a holding potential of -80 mV. hERG current was measured as the outward peak current at TP2 (tail current). The stimulation was repeated with 0.1 Hz frequency during 2 min as baseline and 5 min after TA application. The control inhibitor Cisapride showed an IC<sub>50</sub> value of 0.019 µM.

| Test Article ID | Test Conc., µM | Mean, % | SEM | N | IC <sub>50</sub> /(EC <sub>50</sub> ), µM |                                                                                      |
|-----------------|----------------|---------|-----|---|-------------------------------------------|--------------------------------------------------------------------------------------|
| <b>1a</b>       | 0.01           | -0.4    | 1.0 | 4 | >30                                       | 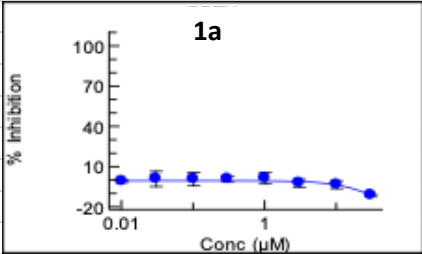 |
|                 | 0.03           | 1.4     | 5.7 | 4 |                                           |                                                                                      |
|                 | 0.1            | 1.1     | 5.0 | 4 |                                           |                                                                                      |
|                 | 0.3            | 1.2     | 2.2 | 4 |                                           |                                                                                      |
|                 | 1              | 1.8     | 4.3 | 4 |                                           |                                                                                      |
|                 | 3              | -1.8    | 2.9 | 3 |                                           |                                                                                      |
|                 | 10             | -3.0    | 2.8 | 4 |                                           |                                                                                      |
|                 | 30             | -10.8   | 0.7 | 3 |                                           |                                                                                      |
| <b>32</b>       | 0.01           | 4.0     | 5.7 | 4 | >30                                       | 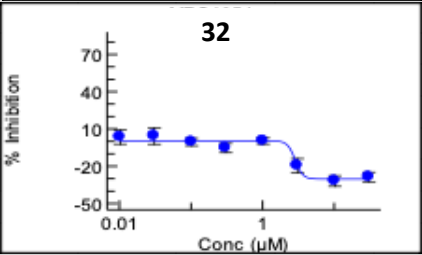 |
|                 | 0.03           | 4.9     | 6.7 | 4 |                                           |                                                                                      |
|                 | 0.1            | 0.0     | 3.0 | 4 |                                           |                                                                                      |
|                 | 0.3            | -4.8    | 3.7 | 4 |                                           |                                                                                      |
|                 | 1              | 0.9     | 2.5 | 4 |                                           |                                                                                      |
|                 | 3              | -19.0   | 5.6 | 4 |                                           |                                                                                      |
|                 | 10             | -31.4   | 4.3 | 4 |                                           |                                                                                      |
|                 | 30             | -28.1   | 3.8 | 4 |                                           |                                                                                      |
| <b>1b</b>       | 0.01           | 1.7     | 3.4 | 4 | (16.032)                                  | 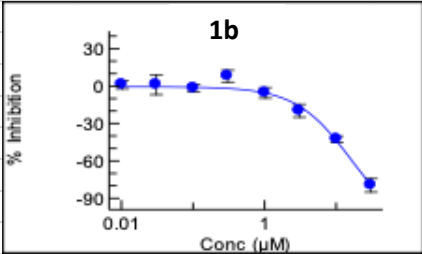 |
|                 | 0.03           | 1.6     | 8.0 | 4 |                                           |                                                                                      |
|                 | 0.1            | -1.3    | 2.9 | 4 |                                           |                                                                                      |
|                 | 0.3            | 8.5     | 4.7 | 4 |                                           |                                                                                      |
|                 | 1              | -5.0    | 4.3 | 4 |                                           |                                                                                      |
|                 | 3              | -19.3   | 5.2 | 4 |                                           |                                                                                      |
|                 | 10             | -42.1   | 2.5 | 4 |                                           |                                                                                      |
|                 | 30             | -79.0   | 5.4 | 4 |                                           |                                                                                      |
